# Supplementary material for: Divergent synthesis of α-functionalized amides through selective N–O/C–C or N–O/C–C/C–N cleavage of aza-cyclobutanone oxime esters
Source: Royal Society of Chemistry journal article supplement (doi:10.1039/d1cc03348d), 2021-01-01
Supplement: d1cc03348d1.pdf [file d1cc03348d1.pdf]

## Supporting Information

# **Divergent Synthesis of $\alpha$ -Functionalized Amides through Selective N-O/C-C or N-O/C-C/C-N Cleavage of Aza-Cyclobutanone Oxime Esters**

Hua-Wei Liu <sup>a</sup>, Dian-Liang Wang <sup>a</sup>, Nan-Quan Jiang <sup>a</sup>, Hai-Yan Li <sup>b</sup>, Zhong-Jian Cai, <sup>\*a</sup>  
Shun-Jun Ji<sup>\*a</sup>

<sup>a</sup> Key Laboratory of Organic Synthesis of Jiangsu Province, College of Chemistry, Chemical Engineering and Materials Science & Collaborative Innovation Center of Suzhou Nano Science and Technology, Soochow University, Suzhou 215123, People's Republic of China

<sup>b</sup> Analysis and Testing Center, Soochow University, Suzhou 215123, People's Republic of China

## Table of Contents

|                                                                                                                                           |    |
|-------------------------------------------------------------------------------------------------------------------------------------------|----|
| 1. General information .....                                                                                                              | 3  |
| 2. Preparation of aza-cyclobutanone oxime esters.....                                                                                     | 3  |
| 3. Experimental Procedure .....                                                                                                           | 6  |
| General procedure for the synthesis of $\alpha$ -cyanomethylaminoamides derivatives<br>(using <b>3a</b> as an illustrative example) ..... | 6  |
| General procedure for the synthesis of $\alpha$ -acyloxyamides derivatives (using <b>5a</b><br>as an illustrative example) .....          | 7  |
| Optimization of reaction conditions .....                                                                                                 | 7  |
| Control experiments.....                                                                                                                  | 8  |
| Synthetic application (using <b>13a</b> as an illustrative example) .....                                                                 | 11 |
| 4. References .....                                                                                                                       | 12 |
| 5. Analytic and characterization data for the products .....                                                                              | 12 |
| 6. $^1\text{H}$ , $^{13}\text{C}$ and $^{19}\text{F}$ NMR spectra of new substrates and all products .....                                | 25 |
| 7. Crystal data and structure refinement for <b>5a</b> and <b>13g</b> .....                                                               | 86 |

## 1. General information

Unless otherwise stated, all reagents were purchased from commercial suppliers and used without further purification. All reactions were carried out under an atmosphere of nitrogen and using anhydrous solvent unless otherwise noted. Fe (CAS 7439-59-6) was purchased from Macklin. Fe(OAc)<sub>2</sub> (CAS 3094-87-9) was purchased from Aladdin. <sup>4</sup>BuNC (CAS 7188-38-7) was purchased from Aladdin. Reactions were monitored by thin-layer chromatography (TLC) using UV light as the visualizing agent and an acid solution of p-Anisaldehyde (PA) with heat as the stains. Flash column chromatography was performed using Yantai Yinlong flash silica gel (200–300 mesh). Melting points were recorded on an Electrothermal digital melting point apparatus. <sup>1</sup>H, <sup>13</sup>C and <sup>19</sup>F NMR spectra were recorded on Bruker 400 MHz spectrometer in CDCl<sub>3</sub> or DMSO-*d*<sub>6</sub> with tetramethylsilane (TMS) as internal standard. The chemical shifts are expressed in ppm and coupling constants are given in Hz. Data for <sup>1</sup>H NMR are recorded as follows: chemical shift (δ, ppm), multiplicity (s = singlet; d = doublet; t = triplet; q = quarter; p = pentet; m = multiplet; br = broad), coupling constant (Hz), integration. Data for <sup>13</sup>C NMR are reported in terms of chemical shift (δ, ppm). High resolution mass spectroscopy (HRMS) analyses were obtained using a commercial apparatus (ESI or EI Source).

## 2. Preparation of aza-cyclobutanone oxime esters

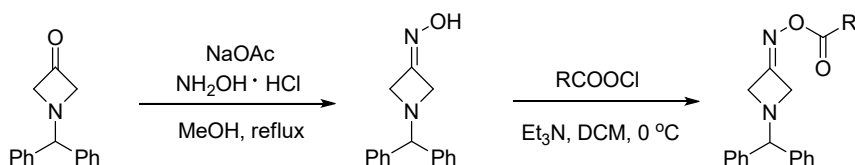

Aza-cyclobutanone oxime esters were prepared following the literature procedures.<sup>[1-2]</sup> To a mixture of 1-benzhydrylazetid-3-one (5 mmol, 1.0 equiv) and hydrazine monohydrate (6 mmol, 1.2 equiv) in MeOH (30 mL) was added NaOAc (11 mmol, 2.2 equiv). The mixture was heated to reflux until the reaction was judged to be complete by TLC analysis. Then it was filtered through celite, the organic layers were concentrated and the resulting residue purified by silica gel column chromatography to provide 1-benzhydrylazetid-3-one oxime. To a mixture of 1-benzhydrylazetid-3-one oxime (1.0 equiv), triethylamine (2.0 equiv) and DCM (0.5M) in a 30-mL two-necked flask was added acyl chloride (1.5 equiv) at 0 °C. After 6 h, water was added to the above solution, and the mixture was diluted with diethyl ether,

and then dried over  $\text{Na}_2\text{SO}_4$ . The organic layers were concentrated and the resulting residue was purified by silica gel column chromatography to obtain the aza-cyclobutanone oxime esters. The product **1a** is a known compound.

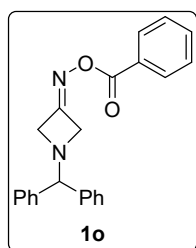

According to the general procedure, **1o** was obtained in 70% yield (0.3742 g). White solid, **mp**: 98.1 – 99.3 °C.  **$^1\text{H}$  NMR (400 MHz,  $\text{CDCl}_3$ )**:  $\delta$  7.98 – 7.95 (m, 2H), 7.56 – 7.49 (m, 1H), 7.49 – 7.42 (m, 4H), 7.39 (t,  $J = 7.7$  Hz, 2H), 7.32 – 7.29 (m, 4H), 7.24 – 7.18 (m, 2H), 4.56 (s, 1H), 4.13 – 4.10 (m, 4H).  **$^{13}\text{C}$  NMR (100 MHz,  $\text{CDCl}_3$ )**:  $\delta$  163.6, 161.8, 141.6, 133.5, 129.7, 128.8, 128.6, 128.5, 127.7, 127.3, 77.3, 60.7, 60.8. **FT-IR (ATR)**: 1745.3, 1450.6, 1253.4, 749.7, 701.8  $\text{cm}^{-1}$ . **HRMS (ESI,  $m/z$ )**: calcd for  $\text{C}_{23}\text{H}_{21}\text{N}_2\text{O}_2^+$ ,  $[\text{M}+\text{H}]^+$ : 357.1603, found: 357.1601.

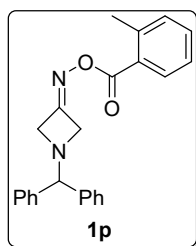

According to the general procedure, **1p** was obtained in 65% yield (0.3611 g). White solid, **mp**: 89.2 – 90.1 °C.  **$^1\text{H}$  NMR (400 MHz,  $\text{CDCl}_3$ )**:  $\delta$  7.76 (d,  $J = 7.8$  Hz, 1H), 7.47 – 7.43 (m, 4H), 7.41 – 7.37 (m, 1H), 7.33 – 7.28 (m, 4H), 7.25 – 7.18 (m, 4H), 4.56 (s, 1H), 4.13 – 4.06 (m, 4H), 2.57 (s, 3H).  **$^{13}\text{C}$  NMR (100 MHz,  $\text{CDCl}_3$ )**:  $\delta$  164.8, 161.5, 141.7, 140.4, 132.5, 131.9, 130.4, 128.9, 128.1, 127.8, 127.4, 125.8, 77.4, 61.1, 61.0, 21.7. **FT-IR (ATR)**: 1746.9, 1455.6, 1231.2, 738.3, 697.2  $\text{cm}^{-1}$ . **HRMS (ESI,  $m/z$ )**: calcd for  $\text{C}_{24}\text{H}_{22}\text{N}_2\text{NaO}_2^+$   $[\text{M}+\text{Na}]^+$ : 393.1579, found: 393.1579.

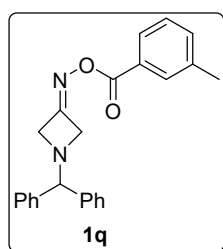

According to the general procedure, **1q** was obtained in 74% yield (0.4112 g). White solid, **mp**: 51.5 – 52.6 °C.  **$^1\text{H}$  NMR (400 MHz,  $\text{CDCl}_3$ )**:  $\delta$  7.81 – 7.74 (m, 2H), 7.48 – 7.43 (m, 4H), 7.35 – 7.24 (m, 6H), 7.23 – 7.18 (m, 2H), 4.56 (s, 1H), 4.15 – 4.06 (m, 4H), 2.34 (s, 3H).  **$^{13}\text{C}$  NMR (100 MHz,  $\text{CDCl}_3$ )**:  $\delta$  163.8, 161.6, 141.6, 138.4, 134.3, 130.2, 128.8, 128.4(1), 128.3(6), 127.6, 127.3, 126.8, 77.2, 60.9, 60.8, 21.3. **FT-IR (ATR)**: 1743.7, 1452.6, 1264.4, 873.0, 737.1, 703.8  $\text{cm}^{-1}$ . **HRMS (ESI,  $m/z$ )**: calcd for  $\text{C}_{24}\text{H}_{23}\text{N}_2\text{O}_2^+$   $[\text{M}+\text{H}]^+$ : 371.1760, found: 371.1744.

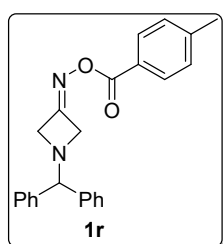

According to the general procedure, **1r** was obtained in 78% yield (0.4334 g). White solid, **mp**: 111.3 – 112.2 °C.  **$^1\text{H}$  NMR (400 MHz,  $\text{CDCl}_3$ )**:  $\delta$  7.86 (d,  $J = 7.9$  Hz, 2H), 7.45 (d,  $J = 7.6$  Hz, 4H), 7.31 – 7.29

(m, 4H), 7.22 – 7.17(m, 4H), 4.55 (s, 1H), 4.11 – 4.08 (m, 4H), 2.35 (s, 3H).  $^{13}\text{C}$  NMR (100 MHz,  $\text{CDCl}_3$ ):  $\delta$  163.6, 161.4, 144.3, 141.6, 129.7, 129.3, 128.8, 127.6, 127.3, 125.7, 77.2, 60.9, 60.8, 21.7. FT-IR (ATR): 1745.3, 1507.4, 1249.8, 742.5, 705.8  $\text{cm}^{-1}$ . HRMS (ESI, m/z): calcd for  $\text{C}_{24}\text{H}_{22}\text{N}_2\text{NaO}_2^+ [\text{M}+\text{Na}]^+$ : 393.1579, found: 393.1570.

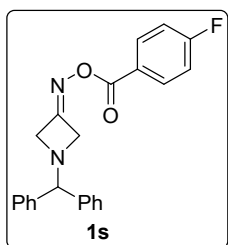

According to the general procedure, **1s** was obtained in 80% yield (0.4493 g). White solid, mp: 117.5 – 118.8 °C.  $^1\text{H}$  NMR (400 MHz,  $\text{CDCl}_3$ ):  $\delta$  8.01 – 7.94 (m, 2H), 7.50 – 7.43 (m, 4H), 7.31 – 7.28 (m, 4H), 7.23 – 7.19 (m, 2H), 7.08 – 7.04 (m, 2H), 4.57 (s, 1H), 4.12 – 4.10 (m, 4H).  $^{13}\text{C}$  NMR (100 MHz,  $\text{CDCl}_3$ ):  $\delta$  166.0 (d,  $J = 253.5$ ), 162.6, 161.9, 141.6, 132.3 (d,  $J = 9.4$  Hz), 128.8, 127.7, 127.3, 124.7 (d,  $J = 3.0$  Hz), 115.8 (d,  $J = 21.9$  Hz), 77.2, 60.9, 60.8. FT-IR (ATR): 1740.4, 1601.5, 1505.0, 1454.4, 1254.2, 847.6, 756.9, 699.3  $\text{cm}^{-1}$ . HRMS (ESI, m/z): calcd for  $\text{C}_{23}\text{H}_{20}\text{N}_2\text{O}_2^+ [\text{M}+\text{H}]^+$ : 375.1509, found: 375.1506.

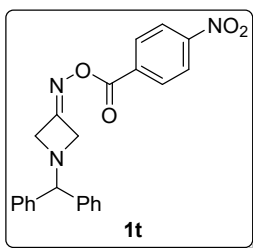

According to the general procedure, **1t** was obtained in 83% yield (0.4998 g). White solid, mp: 126.8 – 127.6 °C.  $^1\text{H}$  NMR (400 MHz,  $\text{CDCl}_3$ ):  $\delta$  8.24 (d,  $J = 8.6$  Hz, 2H), 8.13 (d,  $J = 8.6$  Hz, 2H), 7.49 – 7.43 (m, 4H), 7.35 – 7.28 (m, 4H), 7.25 – 7.20 (m, 2H), 4.59 (s, 1H), 4.17 – 4.10 (m, 4H).  $^{13}\text{C}$  NMR (100 MHz,  $\text{CDCl}_3$ ):  $\delta$  163.1, 161.8, 150.8, 141.4, 134.0, 130.8, 128.9, 127.8, 127.3, 123.7, 77.3, 60.9, 60.8. FT-IR (ATR): 1750.0, 1526.1, 1453.2, 1239.2, 853.4, 747.6, 706.8  $\text{cm}^{-1}$ . HRMS (ESI, m/z): calcd for  $\text{C}_{23}\text{H}_{20}\text{N}_3\text{O}_4^+ [\text{M}+\text{H}]^+$ : 402.1454, found: 402.1445.

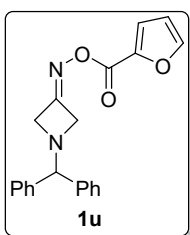

According to the general procedure, **1u** was obtained in 67% yield (0.3479 g) (*E/Z* mixture). White solid, mp: 70.0 – 71.2 °C.  $^1\text{H}$  NMR (400 MHz,  $\text{CDCl}_3$ ):  $\delta$  7.69 (s, 0.41H), 7.57 (s, 1H), 7.45 (d,  $J = 7.4$  Hz, 4H), 7.41 (d,  $J = 3.6$  Hz, 0.49H), 7.34 – 7.26 (m, 4H), 7.25 – 7.20 (m, 2H), 7.18 (d,  $J = 3.6$  Hz, 1H), 6.62 – 6.57 (m, 0.45H), 6.52 – 6.46 (m, 1H), 4.56 (s, 1H), 4.14 – 4.07 (m, 4H).  $^{13}\text{C}$  NMR (100 MHz,  $\text{CDCl}_3$ ):  $\delta$  162.1, 156.1, 153.0, 148.6, 147.0, 143.1, 142.6, 141.6, 128.9, 127.7, 127.4, 121.8, 119.1, 112.8, 112.1, 77.3, 60.9. FT-IR (ATR): 1733.7, 1572.7, 1471.8, 1274.0, 883.4, 771.7, 743.1, 704.9  $\text{cm}^{-1}$ . HRMS (ESI, m/z): calcd for  $\text{C}_{21}\text{H}_{29}\text{N}_2\text{O}_3^+ [\text{M}+\text{H}]^+$ : 347.1396, found: 347.1400.

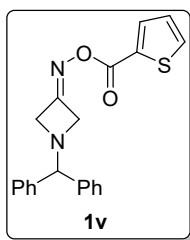

According to the general procedure, **1v** was obtained in 63% yield (0.3425 g). White solid, **mp**: 100.5 – 101.7 °C. **<sup>1</sup>H NMR (400 MHz, CDCl<sub>3</sub>)**: δ 7.83 – 7.77 (m, 1H), 7.57 – 7.51 (m, 1H), 7.49 – 7.42 (m, 4H), 7.34 – 7.27 (m, 4H), 7.25 – 7.19 (m, 2H), 7.12 – 7.03 (m, 1H), 4.56 (s, 1H), 4.13 – 4.06 (m, 4H). **<sup>13</sup>C NMR (100 MHz, CDCl<sub>3</sub>)**: δ 161.8, 159.4, 141.6, 134.4, 133.2, 131.0, 128.9, 128.0, 127.7, 127.3, 77.3, 60.9, 60.8. **FT-IR (ATR)**: 1736.4, 1245.7, 860.0, 734.0, 708.7 cm<sup>-1</sup>. **HRMS (ESI, m/z)**: calcd for C<sub>21</sub>H<sub>19</sub>N<sub>2</sub>O<sub>2</sub>S<sup>+</sup> [M+H]<sup>+</sup>: 363.1167, found: 363.1153.

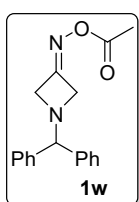

According to the general procedure, **1w** was obtained in 61% yield (0.2693 g). White solid, **mp**: 81.3 – 82.5 °C. **<sup>1</sup>H NMR (400 MHz, CDCl<sub>3</sub>)**: δ 7.47 – 7.41 (m, 4H), 7.34 – 7.26 (m, 4H), 7.26 – 7.17 (m, 2H), 4.53 (s, 1H), 4.06 – 3.98 (m, 4H), 2.08 (s, 3H). **<sup>13</sup>C NMR (100 MHz, CDCl<sub>3</sub>)**: δ 168.1, 161.0, 141.6, 128.8, 127.7, 127.3, 77.3, 60.9, 60.8, 19.3. **FT-IR (ATR)**: 1757.5, 1228.2, 734.3, 703.7 cm<sup>-1</sup>. **HRMS (ESI, m/z)**: calcd for C<sub>18</sub>H<sub>18</sub>N<sub>2</sub>NaO<sub>2</sub><sup>+</sup> [M+Na]<sup>+</sup>: 317.1266, found: 317.1273.

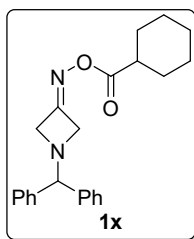

According to the general procedure, **1x** was obtained in 74% yield (0.4023 g). White solid, **mp**: 77.3 – 78.2 °C. **<sup>1</sup>H NMR (400 MHz, CDCl<sub>3</sub>)**: δ 7.43 (d, *J* = 7.7 Hz, 4H), 7.31 – 7.25 (m, 4H), 7.23 – 7.15 (m, 2H), 4.52 (s, 1H), 4.05 – 3.96 (m, 4H), 2.37 – 2.25 (m, 1H), 1.91 – 1.83 (m, 2H), 1.77 – 1.67 (m, 2H), 1.64 – 1.56 (m, 1H), 1.54 – 1.39 (m, 2H), 1.30 – 1.14 (m, 3H). **<sup>13</sup>C NMR (75 MHz, CDCl<sub>3</sub>)**: δ 172.6, 160.8, 141.6, 128.7, 127.5, 127.2, 77.2, 60.8, 60.7, 41.9, 28.9, 25.5, 25.3. **FT-IR (ATR)**: 1755.8, 1490.1, 1449.6, 1238.9, 745.1, 695.2 cm<sup>-1</sup>. **HRMS (ESI, m/z)**: calcd for C<sub>23</sub>H<sub>27</sub>N<sub>2</sub>O<sub>2</sub><sup>+</sup> [M+H]<sup>+</sup>: 363.2073, found: 363.2075.

### 3. Experimental Procedure

#### General procedure for the synthesis of α-cyanomethylaminoamides derivatives (using **3a** as an illustrative example)

In a 5 mL test tube was equipped with a rubber septum and magnetic stir and was charged with **1a** (0.2 mmol, 1.0 equiv), **2a** (0.3 mmol, 1.5 equiv), Fe (0.04 mmol, 0.2 equiv). The flask was evacuated and backfilled with N<sub>2</sub> three times. Dioxane (1 mL) and 20 μL HCl (1 M) was then added with syringe under N<sub>2</sub>. The system was stirred in an oil bath at 90 °C. After 12 h, it was removed from the oil bath, concentrated and the resulting residue was

purified by silica gel column chromatography (eluent:  $V_{PE}/V_{EtOAc} = 5/1$ ) to give the desired product **3a** as a colorless oil (0.0631 g, 94% yield).

### General procedure for the synthesis of $\alpha$ -acyloxyamides derivatives (using **5a** as an illustrative example)

In a 5 mL test tube was equipped with a rubber septum and magnetic stir and was charged with **1a** (0.2 mmol, 1.0 equiv), **2a** (0.5 mmol, 2.5 equiv),  $Fe(OAc)_2$  (0.04 mmol, 0.2 equiv). The flask was evacuated and backfilled with  $N_2$  three times. Dioxane (1 mL) and 20  $\mu$ L HCl (1 M) was then added with syringe under  $N_2$ . The system was stirred in an oil bath at 90 °C. After 48 h, it was removed from the oil bath, concentrated and the resulting residue was purified by silica gel column chromatography (eluent:  $V_{PE}/V_{EtOAc} = 5/1$ ) to give the desired product **5a** as a white solid (0.0425g, 70% yield) with the formation of **4** as a white solid (0.0373g, 84% yield).

### Optimization of reaction conditions

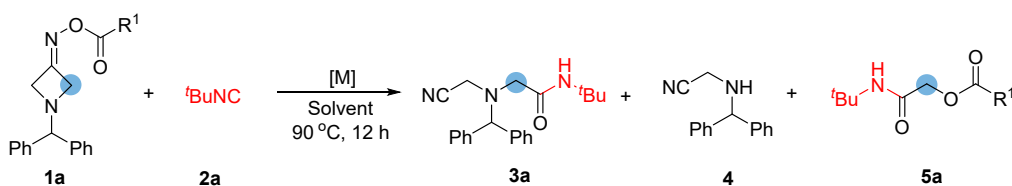

| entry     | catalyst                             | solvent        | <b>3a</b> (%) <sup>b</sup> | <b>4</b> (%) <sup>b</sup> | <b>5a</b> (%) <sup>b</sup> |
|-----------|--------------------------------------|----------------|----------------------------|---------------------------|----------------------------|
| 1         | NiBr <sub>2</sub>                    | Dioxane        | 42                         | 44                        | trace                      |
| 2         | NiBr <sub>2</sub>                    | DMSO           | trace                      | trace                     | trace                      |
| 3         | NiBr <sub>2</sub>                    | DMF            | trace                      | trace                     | trace                      |
| 4         | NiBr <sub>2</sub>                    | Toluene        | 35                         | 62                        | trace                      |
| 5         | NiBr <sub>2</sub>                    | DCM            | trace                      | 34                        | trace                      |
| 6         | NiBr <sub>2</sub>                    | EtOH           | 37                         | trace                     | trace                      |
| 7         | Ni(COD) <sub>2</sub>                 | Dioxane        | 6                          | 70                        | 43                         |
| 8         | FeCl <sub>3</sub>                    | Dioxane        | 52                         | 40                        | 4                          |
| 9         | FeCl <sub>2</sub>                    | Dioxane        | 47                         | 13                        | 10                         |
| 10        | FeBr <sub>2</sub>                    | Dioxane        | 45                         | 15                        | 15                         |
| 11        | FeSO <sub>4</sub> ·7H <sub>2</sub> O | Dioxane        | 80                         | 11                        | trace                      |
| 12        | Fe(OAc) <sub>2</sub>                 | Dioxane        | trace                      | 87                        | 51                         |
| <b>13</b> | <b>Fe</b>                            | <b>Dioxane</b> | <b>94</b>                  | <b>trace</b>              | <b>6</b>                   |
| 14        | CoCl <sub>2</sub>                    | Dioxane        | trace                      | trace                     | trace                      |
| 15        | Pd(OAc) <sub>2</sub>                 | Dioxane        | trace                      | 31                        | trace                      |
| 16        | Pd(dba) <sub>3</sub>                 | Dioxane        | trace                      | trace                     | trace                      |
| 17        | Cu                                   | Dioxane        | 18                         | 59                        | 45                         |
| 18        | CuBr                                 | Dioxane        | 50                         | 26                        | 5                          |
| 19        | CuBr <sub>2</sub>                    | Dioxane        | 40                         | 39                        | trace                      |
| 20        | RuCl <sub>3</sub>                    | Dioxane        | 45                         | 31                        | trace                      |
| 21        | CeCl <sub>3</sub>                    | Dioxane        | 25                         | trace                     | trace                      |

|                       |                            |                |              |           |           |
|-----------------------|----------------------------|----------------|--------------|-----------|-----------|
| 22                    | CrCl <sub>3</sub>          | Dioxane        | 19           | trace     | trace     |
| 23 <sup>c</sup>       | Fe(OAc) <sub>2</sub>       | Dioxane        | trace        | 79        | 62        |
| 24 <sup>d</sup>       | Fe(OAc) <sub>2</sub>       | Dioxane        | trace        | 51        | 65        |
| <b>25<sup>e</sup></b> | <b>Fe(OAc)<sub>2</sub></b> | <b>Dioxane</b> | <b>trace</b> | <b>84</b> | <b>70</b> |
| 26 <sup>f</sup>       | Fe(OAc) <sub>2</sub>       | Dioxane        | 12           | 72        | 60        |
| 27 <sup>g</sup>       | Fe(OAc) <sub>2</sub>       | Dioxane        | 25           | 46        | 41        |

<sup>a</sup>Reaction conditions: **1a** (0.2 mmol), **2a** (0.3 mmol), catalyst (20 mol %), 1 M HCl (20 μL), Dioxane (1 mL), 90 °C, under N<sub>2</sub>. <sup>b</sup>Yield of isolated product. <sup>c</sup>24 h. <sup>d</sup>48 h. <sup>e</sup>**2a** (0.5 mmol), 48 h. <sup>f</sup>Fe(OAc)<sub>2</sub> (10 mol %), 48 h. <sup>g</sup>Fe(OAc)<sub>2</sub> (5 mol %), 48 h.

### Control experiments

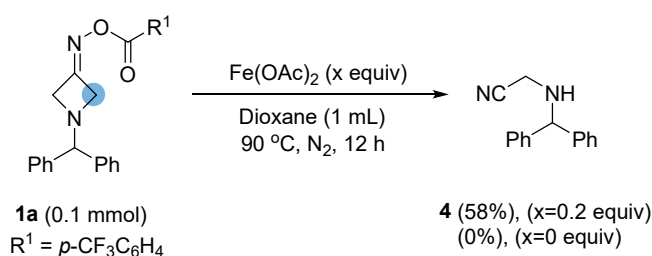

In a 5 mL test tube was equipped with a rubber septum and magnetic stir and was charged with **1a** (0.1 mmol, 1.0 equiv), Fe(OAc)<sub>2</sub> (0.02 mmol, 0.2 equiv). The flask was evacuated and backfilled with N<sub>2</sub> three times. Dioxane (1 mL) was then added with syringe under N<sub>2</sub>. The system was stirred in an oil bath at 90 °C. After 12 h, it was removed from the oil bath, concentrated and the resulting residue was purified by silica gel column chromatography (eluent: V<sub>PE</sub>/V<sub>EtOAc</sub> = 10/1) to give the desired product **4** as a white solid in 58% yield.

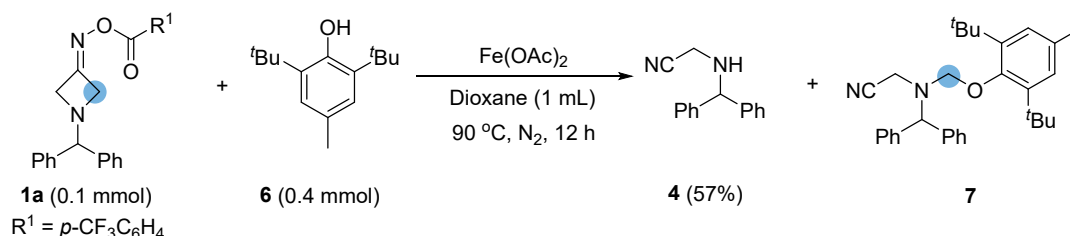

In a 5 mL test tube was equipped with a rubber septum and magnetic stir and was charged with **1a** (0.1 mmol, 1.0 equiv), **6** (0.4 mmol, 4.0 equiv), Fe(OAc)<sub>2</sub> (0.02 mmol, 0.2 equiv). The flask was evacuated and backfilled with N<sub>2</sub> three times. Dioxane (1 mL) was then added with syringe under N<sub>2</sub>. The system was stirred in an oil bath at 90 °C. After 12 h, it was removed from the oil bath, concentrated and the resulting residue was purified by silica gel column chromatography (eluent: V<sub>PE</sub>/V<sub>EtOAc</sub> = 10/1) to give the desired product **4** as a white solid in 57% yield with the formation of **7** identified by HRMS (**HRMS (ESI, m/z)**: calcd for C<sub>31</sub>H<sub>38</sub>N<sub>2</sub>NaO<sup>+</sup> [M+Na]<sup>+</sup>: 477.2882, found: 477.2890).



### Display Report

|                      |                                                      |                  |                             |  |
|----------------------|------------------------------------------------------|------------------|-----------------------------|--|
| <b>Analysis Info</b> |                                                      | Acquisition Date | 5/7/2021 4:20:36 PM         |  |
| Analysis Name        | D:\Data\zyw\sttu-sam\20180116\LHW-112_RB7_01_19127.d | Operator         | bruker                      |  |
| Method               | 0919-MS-low-METHODS.m                                | Instrument       | micrOTOF-Q III 822888.20487 |  |
| Sample Name          | LHW-112                                              | Comment          |                             |  |

|                              |            |                       |           |                  |           |
|------------------------------|------------|-----------------------|-----------|------------------|-----------|
| <b>Acquisition Parameter</b> |            |                       |           |                  |           |
| Source Type                  | ESI        | Ion Polarity          | Positive  | Set Nebulizer    | 1.0 Bar   |
| Focus                        | Not active | Set Capillary         | 4500 V    | Set Dry Heater   | 180 °C    |
| Scan Begin                   | 50 m/z     | Set End Plate Offset  | -500 V    | Set Dry Gas      | 4.0 l/min |
| Scan End                     | 3000 m/z   | Set Collision Cell RF | 300.0 Vpp | Set Divert Valve | Waste     |

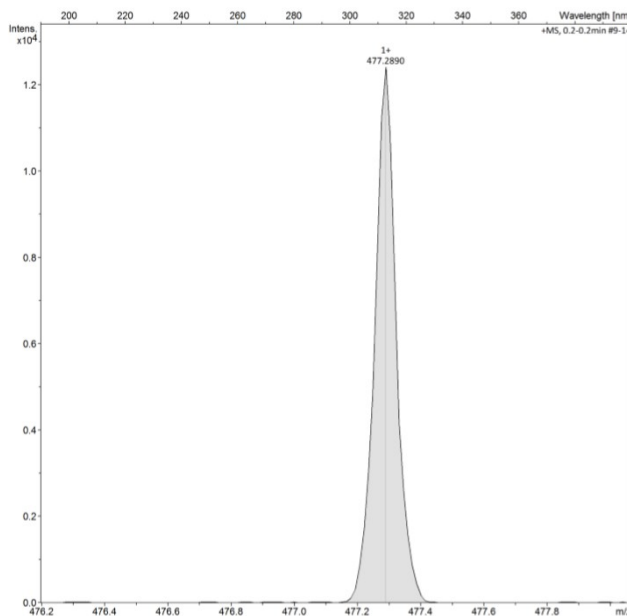

Bruker Compass DataAnalysis 4.2    printed: 5/10/2021 1:22:58 PM    by: bruker    Page 1 of 1

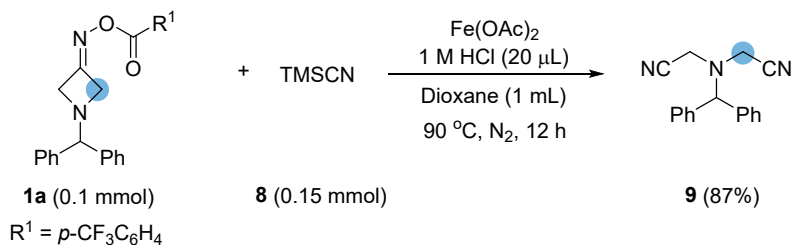

In a 5 mL test tube was equipped with a rubber septum and magnetic stir and was charged with **1a** (0.1 mmol, 1.0 equiv), **8** (0.15 mmol, 1.5 equiv), Fe(OAc)<sub>2</sub> (0.02 mmol, 0.2 equiv). The flask was evacuated and backfilled with N<sub>2</sub> three times. Dioxane (1 mL) and 20 μL HCl (1 M) was then added with syringe under N<sub>2</sub>. The system was stirred in an oil bath at 90 °C. After 12 h, it was removed from the oil bath, concentrated and the resulting residue was purified by silica gel column chromatography (eluent: V<sub>PE</sub>/V<sub>EtOAc</sub> = 10/1) to give the desired product **9** as a white solid in 87% yield.

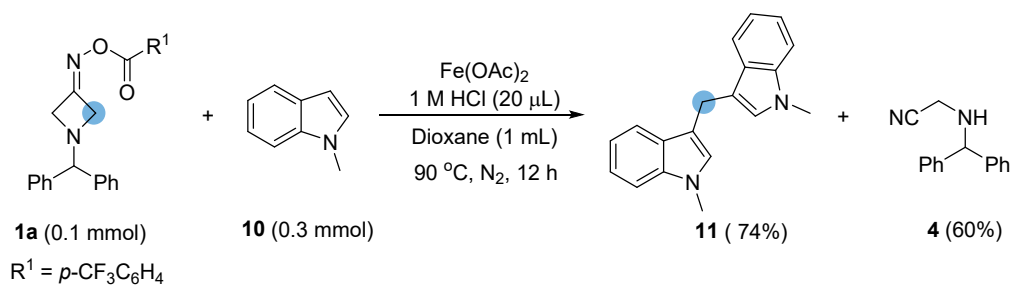

In a 5 mL test tube was equipped with a rubber septum and magnetic stir and was charged with **1a** (0.1 mmol, 1.0 equiv), **10** (0.3 mmol, 3.0 equiv),  $\text{Fe}(\text{OAc})_2$  (0.02 mmol, 0.2 equiv). The flask was evacuated and backfilled with  $\text{N}_2$  three times. Dioxane (1 mL) 20  $\mu\text{L}$  HCl (1 M) was then added with syringe under  $\text{N}_2$ . The system was stirred in an oil bath at 90  $^\circ\text{C}$ . After 12 h, it was removed from the oil bath, concentrated and the resulting residue was purified by silica gel column chromatography (eluent:  $V_{\text{PE}}/V_{\text{EtOAc}} = 10/1$ ) to give the desired product **11** and **4** in 74% and 60% yield respectively.

## Synthetic application (using 13a as an illustrative example)

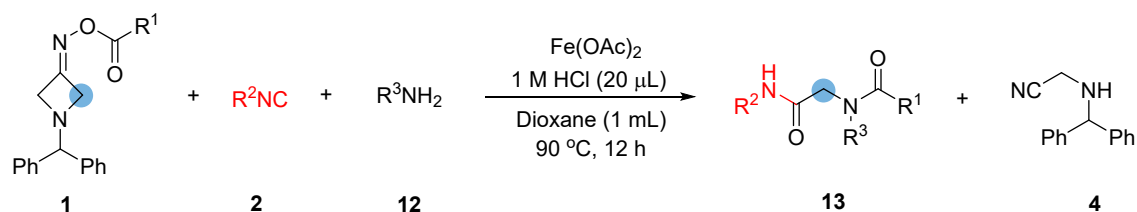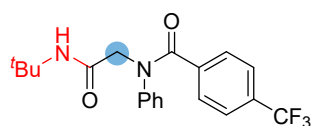

**13a**, 74% (97%)

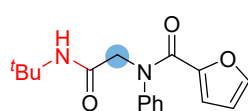

**13b**, 60% (74%)

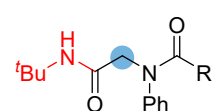

**13c**,  $\text{R}^1 = \text{Ph}$ , 85% (91%)

**13d**,  $\text{R}^1 = \text{Cy}$ , 31% (88%)

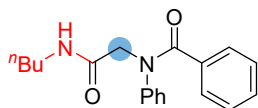

**13e**, 70% (92%)

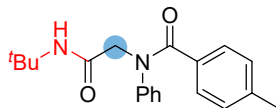

**13f**, 64% (94%)

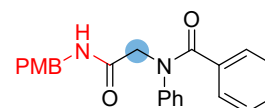

**13g**, 36% (93%)

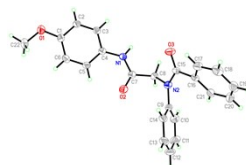

crystal of **13g**  
CCDC 2082920

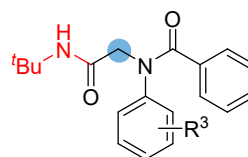

**13h**,  $\text{R}^3 = o\text{-Me}$ , 62% (90%)

**13i**,  $\text{R}^3 = p\text{-F}$ , 61% (88%)

**13j**,  $\text{R}^3 = p\text{-Cl}$ , 65% (90%)

<sup>a</sup>Reaction conditions: **1** (0.2 mmol), **2** (0.5 mmol), **3** (0.3 mmol),  $\text{Fe}(\text{OAc})_2$  (20 mol %), 1 M HCl (20  $\mu\text{L}$ ), Dioxane (1 mL), 90  $^\circ\text{C}$ , 12 h,  $\text{N}_2$ . The numbers in parentheses are the yields of **4**.

In a 5 mL test tube was equipped with a rubber septum and magnetic stir and was charged with **1a** (0.2 mmol, 1.0 equiv), **2a** (0.5 mmol, 2.5 equiv), **12a** (0.3 mmol, 1.5 equiv),  $\text{Fe}(\text{OAc})_2$  (0.04 mmol, 0.2 equiv). The flask was evacuated and backfilled with  $\text{N}_2$  three times. Dioxane (1 mL) and 20  $\mu\text{L}$  HCl (1 M) was then added with syringe under  $\text{N}_2$ . The system was stirred in an oil bath at 90  $^\circ\text{C}$ . After 12 h, it was removed from the oil bath, concentrated and the resulting residue was purified by silica gel column chromatography (eluent:  $V_{\text{PE}}/V_{\text{EtOAc}} = 5/1$ ) to give the desired product **13a** as a white solid (0.0560g, 74% yield) with the formation of **4** as a white solid (0.0431g, 97% yield).

## 4. References

- [1] Xia, P.-J.; Ye, Z.-P.; Hu, Y.-Z.; Song, D.; Xiang, H.-Y.; Chen, X.-Q.; Yang, H. Photocatalytic, Phosphoranyl Radical-Mediated N-O Cleavage of Strained Cycloketone Oximes. *Org. Lett.* **2019**, *21*, 2658.
- [2] Li, J.; Wang, S.-Y.; Ji, S.-J. Nickel-Catalyzed Thiolation and Selenylation of Cycloketone Oxime Esters with Thiosulfonate or Seleniumsulfonate. *J. Org. Chem.* **2019**, *84*, 16147.

## 5. Analytic and characterization data for the products

### 2-(benzhydryl(cyanomethyl)amino)-*N*-(*tert*-butyl)acetamide (**3a**)

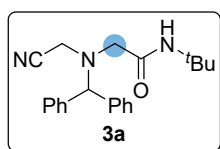

According to the general procedure, **3a** was obtained in 94% yield (63 mg). colorless oil.  $^1\text{H NMR}$  (400 MHz,  $\text{CDCl}_3$ ):  $\delta$  7.47 – 7.40 (m, 4H), 7.36 – 7.29 (m, 4H), 7.28 – 7.22 (m, 2H), 6.51 (s, 1H), 4.82 (s, 1H), 3.58 (s, 2H), 3.20 (s, 2H), 1.39 (s, 9H).  $^{13}\text{C NMR}$  (100 MHz,  $\text{CDCl}_3$ ):  $\delta$  168.3, 140.3, 129.3, 128.3, 127.7, 114.9, 72.3, 55.9, 51.2, 41.6, 28.9. FT-IR (ATR): 3366.8, 2360.6, 1670.0, 1514.1, 1454.2, 1240.9, 747.3  $\text{cm}^{-1}$ . HRMS (ESI,  $m/z$ ): calcd for  $\text{C}_{21}\text{H}_{26}\text{N}_3\text{O}^+$   $[\text{M}+\text{H}]^+$ : 336.2076, found: 336.2082.

### *N*-((3*s*,5*s*,7*s*)-adamantan-1-yl)-2-(benzhydryl(cyanomethyl)amino)acetamide (**3b**)

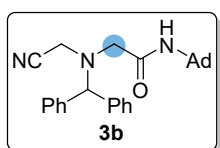

According to the general procedure, **3b** was obtained in 95% yield (79 mg). White solid, mp: 129.1 – 130.2 °C.  $^1\text{H NMR}$  (400 MHz,  $\text{CDCl}_3$ ):  $\delta$  7.47 – 7.40 (m, 4H), 7.37 – 7.30 (m, 4H), 7.28 – 7.23 (m, 2H), 6.38 (s, 1H), 4.82 (s, 1H), 3.57 (s, 2H), 3.17 (s, 2H), 2.14 – 2.08 (m, 3H), 2.05 – 2.00 (m, 6H), 1.74 – 1.68 (m, 6H).  $^{13}\text{C NMR}$  (100 MHz,  $\text{CDCl}_3$ ):  $\delta$  167.8, 140.4, 129.3, 128.3, 127.7, 114.9, 72.2, 55.9, 51.9, 41.9, 41.6, 36.4, 29.5. FT-IR (ATR): 3376.4, 2366.0, 1731.4, 1514.8, 739.6, 702.6  $\text{cm}^{-1}$ . HRMS (ESI,  $m/z$ ): calcd for  $\text{C}_{27}\text{H}_{31}\text{N}_3\text{NaO}^+$   $[\text{M}+\text{Na}]^+$ : 436.2365, found: 436.2368.

### 2-(benzhydryl(cyanomethyl)amino)-*N*-cyclohexylacetamide (**3c**)

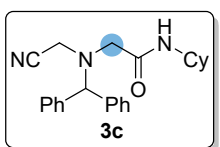

According to the general procedure, **3c** was obtained in 89% yield (64 mg). White solid, mp: 126.5 – 127.6 °C.  $^1\text{H NMR}$  (400 MHz,  $\text{CDCl}_3$ )  $\delta$  7.49 – 7.40 (m, 4H), 7.37 – 7.28 (m, 4H), 7.28 – 7.22 (m, 2H), 6.54 (d,  $J$  = 8.5 Hz, 1H), 4.82 (s, 1H), 3.88 – 3.74 (m, 1H), 3.57 (s, 2H), 3.26 (s, 2H), 1.97 – 1.87 (m, 2H), 1.77 – 1.71 (m, 2H), 1.68 – 1.59 (m, 1H), 1.49 – 1.34 (m, 2H), 1.31 – 1.16 (m, 3H).  $^{13}\text{C}$

**NMR (100 MHz, CDCl<sub>3</sub>)**  $\delta$  167.9, 140.3, 129.3, 128.3, 127.7, 114.8, 72.3, 55.4, 47.9, 41.6, 33.2, 25.6, 24.8. **FT-IR (ATR):** 3358.3, 2358.5, 1665.4, 1511.3, 743.1, 703.5 cm<sup>-1</sup>. **HRMS (ESI, m/z):** calcd for C<sub>23</sub>H<sub>27</sub>N<sub>3</sub>NaO<sup>+</sup> [M+Na]<sup>+</sup>: 384.2052, found: 384.2044.

### 2-(benzhydryl(cyanomethyl)amino)-*N*-butylacetamide (3d)

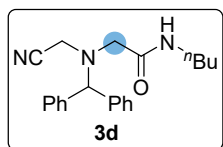

According to the general procedure, **3d** was obtained in 64% yield (43 mg). White solid, **mp**: 94.3 – 95.5 °C. **<sup>1</sup>H NMR (400 MHz, CDCl<sub>3</sub>)**  $\delta$  7.49 – 7.42 (m, 4H), 7.36 – 7.28 (m, 4H), 7.28 – 7.22 (m, 2H), 6.65 (t, *J* = 6.0 Hz, 1H), 4.81 (s, 1H), 3.57 (s, 2H), 3.36 – 3.26 (m, 4H), 1.60 – 1.48 (m, 2H), 1.45 – 1.32 (m, 2H), 0.96 (t, *J* = 7.3 Hz, 3H). **<sup>13</sup>C NMR (100 MHz, CDCl<sub>3</sub>)**  $\delta$  168.8, 140.3, 129.3, 128.3, 127.7, 114.7, 72.3, 55.3, 41.7, 39.0, 31.8, 20.2, 13.9. **FT-IR (ATR):** 3338.6, 1648.4, 1523.3, 745.1, 701.3 cm<sup>-1</sup>. **HRMS (ESI, m/z):** calcd for C<sub>21</sub>H<sub>25</sub>N<sub>3</sub>NaO<sup>+</sup> [M+Na]<sup>+</sup>: 358.1895, found: 358.1907.

### 2-(benzhydryl(cyanomethyl)amino)-*N*-benzylacetamide (3e)

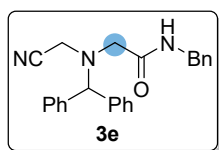

According to the general procedure, **3e** was obtained in 60% yield (44 mg). White solid, **mp**: 112.4 – 113.5 °C. **<sup>1</sup>H NMR (400 MHz, CDCl<sub>3</sub>)**  $\delta$  7.44 – 7.39 (m, 4H), 7.39 – 7.35 (m, 2H), 7.33 – 7.22 (m, 9H), 6.95 (t, *J* = 6.2 Hz, 1H), 4.81 (s, 1H), 4.50 (d, *J* = 5.9 Hz, 2H), 3.56 (s, 2H), 3.36 (s, 2H). **<sup>13</sup>C NMR (100 MHz, CDCl<sub>3</sub>)**  $\delta$  168.9, 140.2, 138.2, 129.3, 129.0, 128.4, 127.8(4), 127.7(5), 127.6(5), 114.7, 72.4, 55.4, 43.3, 41.8. **FT-IR (ATR):** 3287.5, 2365.5, 1649.6, 1520.8, 733.6, 695.5 cm<sup>-1</sup>. **HRMS (ESI, m/z):** calcd for C<sub>24</sub>H<sub>23</sub>N<sub>3</sub>NaO<sup>+</sup> [M+Na]<sup>+</sup>: 392.1739, found: 392.1749.

### 2-(benzhydryl(cyanomethyl)amino)-*N*-(2,6-dimethylphenyl)acetamide (3f)

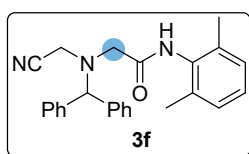

According to the general procedure, **3f** was obtained in 70% yield (54 mg). White solid, **mp**: 89.1 – 90.2 °C. **<sup>1</sup>H NMR (400 MHz, DMSO-*d*<sub>6</sub>)**  $\delta$  9.56 (s, 1H), 7.76 – 7.70 (m, 4H), 7.36 – 7.31 (m, 4H), 7.28 – 7.23 (m, 2H), 7.11 (s, 3H), 4.84 (s, 1H), 3.79 (s, 2H), 3.27 (s, 2H), 2.15 (s, 6H). **<sup>13</sup>C NMR (100 MHz, DMSO-*d*<sub>6</sub>)**  $\delta$  167.0, 141.6, 135.6, 134.9, 128.9, 127.7(3), 127.7(1), 127.6(8), 126.7, 115.5, 71.8, 54.8, 41.5, 18.2. **FT-IR (ATR):** 3262.7, 2367.8, 1670.3, 1494.6, 771.7, 705.4 cm<sup>-1</sup>. **HRMS (ESI, m/z):** calcd for C<sub>25</sub>H<sub>25</sub>N<sub>3</sub>NaO<sup>+</sup> [M+Na]<sup>+</sup>: 406.1895, found: 406.1902.

### 2-(benzhydryl(cyanomethyl)amino)-*N*-(4-chlorophenyl)acetamide (3g)

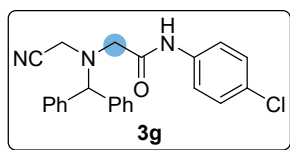

According to the general procedure, **3g** was obtained in 64% yield (51 mg). White solid, mp: 158.9 – 159.8 °C.  $^1\text{H NMR}$  (400 MHz,  $\text{CDCl}_3$ )  $\delta$  8.43 (s, 1H), 7.52 – 7.47 (m, 5H), 7.39 – 7.25 (m, 9H), 4.89 (s, 1H), 3.65 (s, 2H), 3.44 (s, 2H).  $^{13}\text{C NMR}$  (100 MHz,  $\text{CDCl}_3$ )  $\delta$  167.1, 139.9, 135.8, 130.0, 129.5, 129.4, 128.6, 127.8, 121.1, 114.5, 72.5, 56.1, 42.0. FT-IR (ATR): 3044.2, 2366.0, 1667.5, 1491.9, 746.2, 703.9  $\text{cm}^{-1}$ . HRMS (ESI, m/z): calcd for  $\text{C}_{23}\text{H}_{20}\text{N}_3\text{NaO}^+$  [M+Na] $^+$ : 412.1193, found: 412.1194.

#### ethyl 4-(2-(benzhydryl(cyanomethyl)amino)acetamido)benzoate (3h)

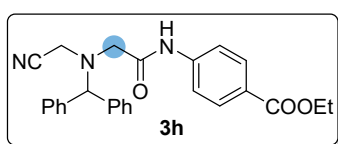

According to the general procedure, **3h** was obtained in 28% yield (24 mg). Yellow oil.  $^1\text{H NMR}$  (400 MHz,  $\text{CDCl}_3$ )  $\delta$  8.70 (s, 1H), 8.07 – 8.00 (m, 2H), 7.68 – 7.61 (m, 2H), 7.52 – 7.46 (m, 4H), 7.37 – 7.30 (m, 4H), 7.28 – 7.23 (m, 2H), 4.87 (s, 1H), 4.36 (q,  $J = 7.1$  Hz, 2H), 3.68 (s, 2H), 3.47 (s, 2H), 1.39 (t,  $J = 7.1$  Hz, 3H).  $^{13}\text{C NMR}$  (100 MHz,  $\text{CDCl}_3$ )  $\delta$  167.4, 166.1, 141.2, 139.8, 131.0, 129.5, 128.6, 127.8, 126.6, 119.0, 114.6, 72.4, 61.1, 56.1, 41.9, 14.4. FT-IR (ATR): 3333.1, 1703.9, 1598.5, 1517.5, 746.7, 697.0  $\text{cm}^{-1}$ . HRMS (ESI, m/z): calcd for  $\text{C}_{26}\text{H}_{25}\text{N}_3\text{NaO}_3^+$  [M+Na] $^+$ : 450.1794, found: 450.1800.

#### 2-(benzhydryl(cyanomethyl)amino)-N-(3-nitrophenyl)acetamide (3i)

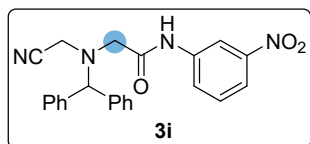

According to the general procedure, **3i** was obtained in 27% yield (22 mg). Yellow oil.  $^1\text{H NMR}$  (400 MHz,  $\text{CDCl}_3$ )  $\delta$  8.74 (s, 1H), 8.37 (t,  $J = 2.2$  Hz, 1H), 8.05 – 7.94 (m, 2H), 7.56 – 7.48 (m, 5H), 7.38 – 7.33 (m, 4H), 7.30 – 7.25 (m, 2H), 4.89 (s, 1H), 3.70 (s, 2H), 3.51 (s, 2H).  $^{13}\text{C NMR}$  (100 MHz,  $\text{CDCl}_3$ )  $\delta$  167.7, 148.7, 148.6, 139.8, 138.3, 130.2, 129.5, 128.6, 127.8, 125.7, 119.4, 114.6, 72.5, 56.0, 42.0. FT-IR (ATR): 3326.8, 1697.5, 1525.8, 1517.5, 737.3, 705.1  $\text{cm}^{-1}$ . HRMS (ESI, m/z): calcd for  $\text{C}_{23}\text{H}_{20}\text{N}_4\text{NaO}_3^+$  [M+Na] $^+$ : 423.1433, found: 423.1439.

#### 2-(tert-butylamino)-2-oxoethyl 4-(trifluoromethyl)benzoate (5a)

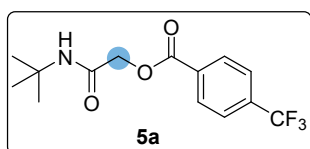

According to the general procedure, **5a** was obtained in 70% yield (43 mg). White solid, mp: 134.9 – 135.8 °C.  $^1\text{H NMR}$  (400 MHz,  $\text{CDCl}_3$ ):  $\delta$  8.17 (d,  $J = 8.1$  Hz, 2H), 7.74 (d,  $J = 8.1$  Hz, 2H), 5.85 (s, 1H), 4.73 (s, 2H), 1.39 (s, 9H).  $^{13}\text{C NMR}$  (100 MHz,  $\text{CDCl}_3$ ):  $\delta$  165.8, 164.3, 135.2 (q,  $J = 32.8$  Hz), 132.5, 130.3, 125.8 (q,  $J = 3.7$  Hz), 123.6 (q,  $J = 272.8$  Hz), 64.1, 51.8, 28.9.  $^{19}\text{F NMR}$  (376 MHz,  $\text{CDCl}_3$ )  $\delta$  -63.24. FT-IR (ATR): 3334.0, 1719.8, 1654.3, 1507.4,

1423.7, 1125.8, 868.2  $\text{cm}^{-1}$ . **HRMS (ESI, m/z):** calcd for  $\text{C}_{14}\text{H}_{17}\text{F}_3\text{NO}_3^+$   $[\text{M}+\text{H}]^+$ : 304.1161, found: 304.1165.

### 2-(adamantan-1-ylamino)-2-oxoethyl 4-(trifluoromethyl)benzoate (**5b**)

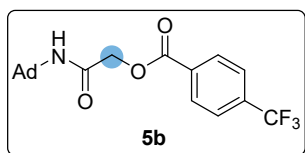

According to the general procedure, **5b** was obtained in 60% yield (46 mg). White solid, **mp**: 130.2 – 131.4 °C.  **$^1\text{H}$  NMR (400 MHz,  $\text{CDCl}_3$ ):**  $\delta$  8.18 (d,  $J$  = 8.0 Hz, 2H), 7.76 (d,  $J$  = 8.0 Hz, 2H), 5.69 (s, 1H), 4.73 (s, 2H), 2.12 – 2.07 (m, 3H), 2.06 – 2.01 (m, 6H), 1.71 – 1.66 (m, 6H).  **$^{13}\text{C}$  NMR (100 MHz,  $\text{CDCl}_3$ ):**  $\delta$  165.4, 164.2, 135.2 (q,  $J$  = 32.4 Hz), 132.5, 130.3, 125.8 (q,  $J$  = 3.7 Hz), 123.6 (q,  $J$  = 273.1 Hz), 64.1, 52.4, 41.7, 36.4, 29.5.  **$^{19}\text{F}$  NMR (376 MHz,  $\text{CDCl}_3$ )**  $\delta$  -63.22. **FT-IR (ATR):** 3331.2, 1725.3, 1666.0, 1507.4, 1420.4, 1129.4, 866.6  $\text{cm}^{-1}$ . **HRMS (ESI, m/z):** calcd for  $\text{C}_{20}\text{H}_{22}\text{F}_3\text{NNaO}_3^+$   $[\text{M}+\text{Na}]^+$ : 404.1449, found: 404.1449.

### 2-(cyclohexylamino)-2-oxoethyl 4-(trifluoromethyl)benzoate (**5c**)

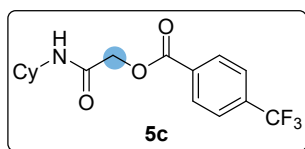

According to the general procedure, **5c** was obtained in 51% yield (34 mg). White solid, **mp**: 135.7 – 136.6 °C.  **$^1\text{H}$  NMR (400 MHz,  $\text{CDCl}_3$ ):**  $\delta$  8.18 (d,  $J$  = 8.1 Hz, 2H), 7.77 (d,  $J$  = 8.2 Hz, 2H), 5.91 (d,  $J$  = 8.0 Hz, 1H), 4.82 (s, 2H), 3.93 – 3.80 (m, 1H), 2.00 – 1.91 (m, 2H), 1.74 – 1.61 (m, 3H), 1.46 – 1.34 (m, 2H), 1.24 – 1.12 (m, 3H).  **$^{13}\text{C}$  NMR (100 MHz,  $\text{CDCl}_3$ ):**  $\delta$  165.7, 164.3, 135.3 (q,  $J$  = 32.9 Hz), 132.5, 130.3, 125.9 (q,  $J$  = 3.6 Hz), 123.6 (q,  $J$  = 272.8 Hz), 64.0, 48.3, 33.1, 25.5, 24.9.  **$^{19}\text{F}$  NMR (376 MHz,  $\text{CDCl}_3$ )**  $\delta$  -63.24. **FT-IR (ATR):** 3282.3, 1724.7, 1653.7, 1420.0, 1123.8, 866.3  $\text{cm}^{-1}$ . **HRMS (ESI, m/z):** calcd for  $\text{C}_{16}\text{H}_{19}\text{F}_3\text{NO}_3^+$   $[\text{M}+\text{H}]^+$ : 330.1317, found: 330.1324.

### 2-(butylamino)-2-oxoethyl 4-(trifluoromethyl)benzoate (**5d**)

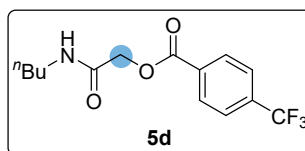

According to the general procedure, **5d** was obtained in 61% yield (37 mg). White solid, **mp**: 124.1 – 125.3 °C.  **$^1\text{H}$  NMR (400 MHz,  $\text{CDCl}_3$ ):**  $\delta$  8.19 (d,  $J$  = 8.1 Hz, 2H), 7.76 (d,  $J$  = 8.2 Hz, 2H), 6.08 (s, 1H), 4.84 (s, 2H), 3.39 – 3.30 (m, 2H), 1.59 – 1.47 (m, 2H), 1.43 – 1.29 (m, 2H), 0.93 (t,  $J$  = 7.3 Hz, 3H).  **$^{13}\text{C}$  NMR (100 MHz,  $\text{CDCl}_3$ ):**  $\delta$  166.6, 164.3, 135.3 (q,  $J$  = 32.8 Hz), 132.4 (q,  $J$  = 0.7 Hz), 130.3, 125.9 (q,  $J$  = 3.7 Hz), 123.6 (q,  $J$  = 273.1 Hz), 64.0, 39.2, 31.7, 20.2, 13.8.  **$^{19}\text{F}$  NMR (376 MHz,  $\text{CDCl}_3$ )**  $\delta$  -63.24. **FT-IR (ATR):** 3288.7, 1732.5, 1653.7, 1507.3, 1457.1, 1418.7, 1124.1, 862.4  $\text{cm}^{-1}$ . **HRMS (ESI, m/z):** calcd for  $\text{C}_{14}\text{H}_{17}\text{F}_3\text{NO}_3^+$   $[\text{M}+\text{H}]^+$ : 304.1161, found: 304.1157.

### 2-(benzylamino)-2-oxoethyl 4-(trifluoromethyl)benzoate (5e)

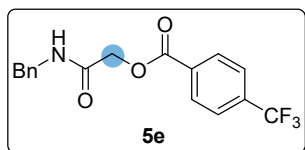

According to the general procedure, **5e** was obtained in 61% yield (41 mg). White solid, **mp**: 128.5 – 129.7 °C. **<sup>1</sup>H NMR (400 MHz, CDCl<sub>3</sub>)**: δ 8.16 (d, *J* = 8.2 Hz, 2H), 7.73 (d, *J* = 8.2 Hz, 2H), 7.37 – 7.28 (m, 5H), 6.36 (s, 1H), 4.89 (s, 2H), 4.54 (d, *J* = 5.9 Hz, 2H). **<sup>13</sup>C NMR (100 MHz, CDCl<sub>3</sub>)**: δ 166.7, 164.4, 137.7, 135.3 (q, *J* = 32.9 Hz), 132.3, 130.4, 129.0, 128.0, 127.9, 125.9 (q, *J* = 3.9 Hz), 123.6 (q, *J* = 272.9 Hz), 63.9, 43.4. **<sup>19</sup>F NMR (376 MHz, CDCl<sub>3</sub>)** δ -63.24. **FT-IR (ATR)**: 3285.0, 1716.9, 1653.5, 1457.0, 1123.6, 861.1 cm<sup>-1</sup>. **HRMS (ESI, m/z)**: calcd for C<sub>17</sub>H<sub>15</sub>F<sub>3</sub>NO<sub>3</sub><sup>+</sup> [M+H]<sup>+</sup>: 338.1004, found: 338.0992.

### 2-((2-(1-methyl-1*H*-indol-3-yl)ethyl)amino)-2-oxoethyl 4-(trifluoromethyl)benzoate (5f)

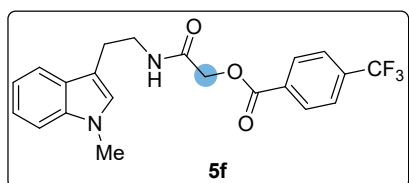

According to the general procedure, **5f** was obtained in 58% yield (47 mg). White solid, **mp**: 102.7 – 103.8 °C. **<sup>1</sup>H NMR (400 MHz, CDCl<sub>3</sub>)**: δ 7.89 (d, *J* = 8.2 Hz, 2H), 7.63 (d, *J* = 8.2 Hz, 2H), 7.57 (d, *J* = 7.9 Hz, 1H), 7.27 (s, 1H), 7.23 – 7.17 (m, 1H), 7.10 – 7.02 (m, 1H), 6.84 (s, 1H), 6.20 (s, 1H), 4.79 (s, 2H), 3.68 (q, *J* = 6.3 Hz, 2H), 3.64 (s, 3H), 3.00 (t, *J* = 6.5 Hz, 2H). **<sup>13</sup>C NMR (100 MHz, CDCl<sub>3</sub>)**: δ 166.7, 164.1, 137.2, 135.0 (q, *J* = 32.8 Hz), 132.2 (q, *J* = 1.6 Hz), 130.2, 127.8, 127.1, 125.7 (q, *J* = 3.7 Hz), 123.6 (q, *J* = 272.6 Hz), 122.1, 119.3, 118.8, 111.0, 109.5, 63.7, 39.7, 32.7, 25.0. **<sup>19</sup>F NMR (376 MHz, CDCl<sub>3</sub>)** δ -63.22. **FT-IR (ATR)**: 3284.5, 1733.1, 1652.0, 1507.3, 1420.6, 1120.3, 866.2 cm<sup>-1</sup>. **HRMS (ESI, m/z)**: calcd for C<sub>21</sub>H<sub>19</sub>F<sub>3</sub>N<sub>2</sub>NaO<sub>3</sub><sup>+</sup> [M+Na]<sup>+</sup>: 427.1245, found: 427.1246.

### 2-((2-(1-benzyl-1*H*-indol-3-yl)ethyl)amino)-2-oxoethyl 4-(trifluoromethyl)benzoate (5g)

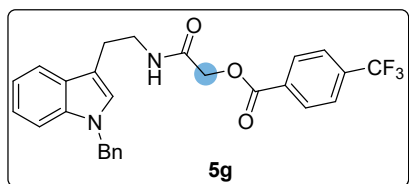

According to the general procedure, **5g** was obtained in 42% yield (42 mg). White solid, **mp**: 115.3 – 116.5 °C. **<sup>1</sup>H NMR (400 MHz, CDCl<sub>3</sub>)**: δ 7.84 (d, *J* = 8.1 Hz, 2H), 7.62 – 7.53 (m, 3H), 7.25 – 7.21 (m, 4H), 7.13 (t, *J* = 7.5 Hz, 1H), 7.09 – 7.02 (m, 3H), 6.95 (s, 1H), 6.20 – 6.13 (m, 1H), 5.18 (s, 2H), 4.77 (s, 2H), 3.69 (q, *J* = 6.4 Hz, 2H), 3.02 (t, *J* = 6.6 Hz, 2H). **<sup>13</sup>C NMR (100 MHz, CDCl<sub>3</sub>)**: δ 166.6, 164.1, 137.4, 136.8, 135.0 (q, *J* = 32.7 Hz), 132.2 (q, *J* = 1.0 Hz), 130.1, 128.9, 128.2, 127.8, 126.8, 126.4, 125.7 (q, *J* = 3.8 Hz), 123.6 (q, *J* = 271.1 Hz), 122.3, 119.6, 118.9, 111.8, 110.0, 63.8, 50.1, 39.8, 25.1. **<sup>19</sup>F NMR (376 MHz, CDCl<sub>3</sub>)** δ -63.18. **FT-IR (ATR)**: 3329.5,



1733.8, 1688.1, 1507.3, 1456.8, 1280.7, 1126.0, 867.0  $\text{cm}^{-1}$ . **HRMS (ESI, m/z):** calcd for  $\text{C}_{27}\text{H}_{23}\text{F}_3\text{N}_2\text{NaO}_3^+$   $[\text{M}+\text{Na}]^+$ : 503.1558, found: 503.1545.

### 2-((4-methoxyphenyl)amino)-2-oxoethyl 4-(trifluoromethyl)benzoate (5h)

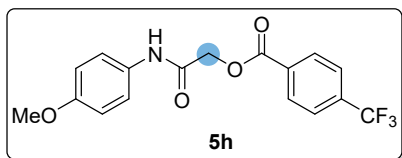

According to the general procedure, **5h** was obtained in 61% yield (43 mg). Yellow solid, **mp**: 130.9 – 132.0 °C.  **$^1\text{H}$  NMR (400 MHz,  $\text{CDCl}_3$ ):**  $\delta$  8.22 (d,  $J = 8.1$  Hz, 2H), 7.80 – 7.72 (m, 3H), 7.44 – 7.39 (m, 2H), 6.89 – 6.84 (m, 2H), 4.95 (s, 2H), 3.79 (s, 3H);  **$^{13}\text{C}$  NMR (100 MHz,  $\text{CDCl}_3$ ):**  $\delta$  164.9, 164.4, 157.1, 135.3 (q,  $J = 32.7$  Hz), 132.3, 130.4, 129.7, 125.8 (q,  $J = 3.5$  Hz), 123.6 (q,  $J = 271.3$  Hz), 122.4, 114.3, 64.0, 55.6;  **$^{19}\text{F}$  NMR (376 MHz,  $\text{CDCl}_3$ )**  $\delta$  -63.22; **FT-IR (ATR):** 3314.6, 1733.1, 1667.9, 1508.4, 1130.0, 866.2  $\text{cm}^{-1}$ . **HRMS (ESI, m/z):** calcd for  $\text{C}_{17}\text{H}_{14}\text{F}_3\text{NNaO}_4$   $[\text{M}+\text{Na}]^+$ : 346.0773, found: 346.0777.

### 2-((4-ethoxyphenyl)amino)-2-oxoethyl 4-(trifluoromethyl)benzoate (5i)

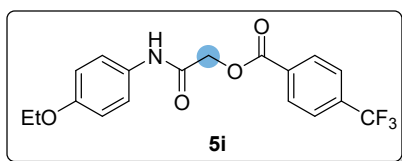

According to the general procedure, **5i** was obtained in 51% yield (37.5 mg). Yellow solid, **mp**: 130.1 – 131.3 °C.  **$^1\text{H}$  NMR (400 MHz,  $\text{CDCl}_3$ ):**  $\delta$  8.22 (d,  $J = 8.1$  Hz, 2H), 7.77 (d,  $J = 8.2$  Hz, 2H), 7.72 (s, 1H), 7.45 – 7.36 (m, 2H), 6.90 – 6.81 (m, 2H), 4.96 (s, 2H), 4.01 (q,  $J = 7.0$  Hz, 2H), 1.40 (t,  $J = 7.0$  Hz, 3H).  **$^{13}\text{C}$  NMR (100 MHz,  $\text{CDCl}_3$ ):**  $\delta$  164.7, 164.4, 156.6, 135.4 (q,  $J = 32.7$  Hz), 132.3, 130.4, 129.5, 125.9 (q,  $J = 3.6$  Hz), 123.6 (q,  $J = 32.7$  Hz), 122.4, 115.0, 64.1, 63.9, 14.9.  **$^{19}\text{F}$  NMR (376 MHz,  $\text{CDCl}_3$ )**  $\delta$  -63.22. **FT-IR (ATR):** 3312.7, 1728.5, 1670.7, 1498.0, 1112.3, 864.8  $\text{cm}^{-1}$ . **HRMS (ESI, m/z):** calcd for  $\text{C}_{17}\text{H}_{14}\text{F}_3\text{NNaO}_4^+$   $[\text{M}+\text{Na}]^+$ : 346.0773, found: 346.0777.

### 2-((4-ethoxyphenyl)amino)-2-oxoethyl 4-(trifluoromethyl)benzoate (5j)

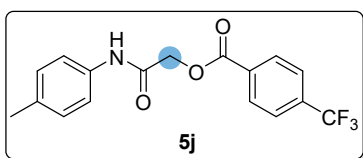

According to the general procedure, **5j** was obtained in 56% yield (38 mg). Yellow solid, **mp**: 133.5 – 134.7 °C.  **$^1\text{H}$  NMR (400 MHz,  $\text{CDCl}_3$ ):**  $\delta$  8.22 (d,  $J = 8.1$  Hz, 2H), 7.80 – 7.72 (m, 3H), 7.40 (d,  $J = 8.2$  Hz, 2H), 7.14 (d,  $J = 8.1$  Hz, 2H), 4.96 (s, 2H), 2.32 (s, 3H).  **$^{13}\text{C}$  NMR (100 MHz,  $\text{CDCl}_3$ ):**  $\delta$  164.7, 164.4, 135.4 (q,  $J = 33.0$  Hz), 135.1, 134.1, 132.3, 130.4, 129.8, 125.9 (q,  $J = 3.7$  Hz), 123.6 (q,  $J = 272.6$  Hz), 120.5, 64.1, 21.0.  **$^{19}\text{F}$  NMR (376 MHz,  $\text{CDCl}_3$ )**  $\delta$  -63.23. **FT-IR (ATR):** 3312.7, 1731.2, 1670.7,

1498.0, 1112.3, 864.8  $\text{cm}^{-1}$ . **HRMS (ESI, m/z):** calcd for  $\text{C}_{17}\text{H}_{14}\text{F}_3\text{NNaO}_3^+$   $[\text{M}+\text{Na}]^+$ : 360.0823, found: 360.0819.

### 2-oxo-2-(o-tolylamino)ethyl 4-(trifluoromethyl)benzoate (**5k**)

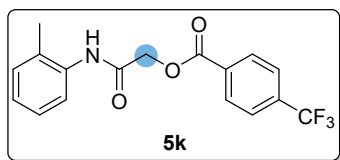

According to the general procedure, **5k** was obtained in 60% yield (41 mg). White solid, **mp**: 150.2 – 151.4 °C.  **$^1\text{H}$  NMR (400 MHz,  $\text{CDCl}_3$ ):**  $\delta$  8.23 (d,  $J = 8.1$  Hz, 2H), 7.88 (d,  $J = 8.0$  Hz, 1H), 7.81 – 7.72 (m, 3H), 7.26 – 7.18 (m, 2H), 7.14 – 7.08 (m, 1H), 5.01 (s, 2H), 2.25 (s, 3H).  **$^{13}\text{C}$  NMR (100 MHz,  $\text{CDCl}_3$ ):**  $\delta$  164.8, 164.3, 135.5 (q,  $J = 32.1$  Hz), 134.7, 132.2, 130.8, 130.3, 128.9, 127.2, 126.0 (q,  $J = 3.7$  Hz), 125.9, 123.6 (q,  $J = 273.9$  Hz), 123.0, 64.4, 17.7.  **$^{19}\text{F}$  NMR (376 MHz,  $\text{CDCl}_3$ )**  $\delta$  -63.23. **FT-IR (ATR):** 3274.6, 1735.4, 1663.9, 1507.3, 1457.3, 1130.5, 860.6  $\text{cm}^{-1}$ . **HRMS (ESI, m/z):** calcd for  $\text{C}_{17}\text{H}_{14}\text{F}_3\text{NNaO}_3^+$   $[\text{M}+\text{Na}]^+$ : 360.0823, found: 360.0819.

### 2-((2,6-dimethylphenyl)amino)-2-oxoethyl 4-(trifluoromethyl)benzoate (**5l**)

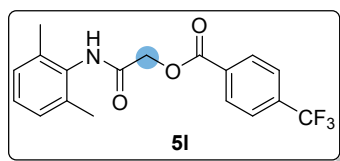

According to the general procedure, **5l** was obtained in 64% yield (45 mg). White solid, **mp**: 155.8 – 156.9 °C.  **$^1\text{H}$  NMR (400 MHz,  $\text{DMSO-}d_6$ ):**  $\delta$  9.57 (s, 1H), 8.27 (d,  $J = 8.1$  Hz, 2H), 7.95 (d,  $J = 8.1$  Hz, 2H), 7.08 (s, 3H), 5.02 (s, 2H), 2.17 (s, 6H);  **$^{13}\text{C}$  NMR (100 MHz,  $\text{DMSO-}d_6$ ):**  $\delta$  165.1, 164.5, 135.4, 134.2, 133.0(4) (q,  $J = 0.7$  Hz), 133.0(3) (q,  $J = 31.7$  Hz), 130.4, 127.7, 126.7, 125.8 (q,  $J = 3.8$  Hz), 123.7 (q,  $J = 272.7$  Hz), 63.5, 18.0.  **$^{19}\text{F}$  NMR (376 MHz,  $\text{DMSO-}d_6$ )**  $\delta$  -61.68. **FT-IR (ATR):** 3257.9, 1733.3, 1670.2, 1415.0, 1125.9, 864.5  $\text{cm}^{-1}$ . **HRMS (ESI, m/z):** calcd for  $\text{C}_{18}\text{H}_{16}\text{F}_3\text{NNaO}_3^+$   $[\text{M}+\text{Na}]^+$ : 374.0980, found: 374.0969.

### 2-((4-chlorophenyl)amino)-2-oxoethyl 4-(trifluoromethyl)benzoate (**5m**)

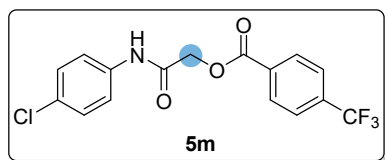

According to the general procedure, **5m** was obtained in 24% yield (17 mg). Yellow solid, **mp**: 147.3 – 148.5 °C.  **$^1\text{H}$  NMR (400 MHz,  $\text{DMSO-}d_6$ ):**  $\delta$  10.40 (s, 1H), 8.23 (d,  $J = 8.1$  Hz, 2H), 7.94 (d,  $J = 8.2$  Hz, 2H), 7.65 – 7.59 (m, 2H), 7.41 – 7.34 (m, 2H), 4.99 (s, 2H).  **$^{13}\text{C}$  NMR (100 MHz,  $\text{DMSO-}d_6$ ):**  $\delta$  165.2, 164.4, 137.3, 133.1 (q,  $J = 32.2$  Hz), 132.9, 130.3, 128.7, 127.2, 125.8 (q,  $J = 3.8$  Hz), 123.7 (q,  $J = 272.6$  Hz), 120.9, 63.5.  **$^{19}\text{F}$  NMR (376 MHz,  $\text{DMSO-}d_6$ )**  $\delta$  -61.73. **FT-IR (ATR):** 3312.6, 1720.7,

1672.5, 1490.4, 1117.4, 867.2  $\text{cm}^{-1}$ . **HRMS (ESI, m/z):** calcd for  $\text{C}_{16}\text{H}_{11}\text{ClF}_3\text{NNaO}_3^+$   $[\text{M}+\text{Na}]^+$ : 380.0277, found: 380.0276.

### 2-(*tert*-butylamino)-2-oxoethyl benzoate (**5o**)

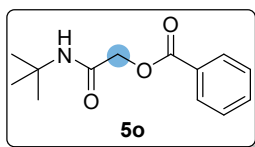

According to the general procedure, **5o** was obtained in 70% yield (33 mg). White solid, **mp**: 96.4 – 97.5 °C.  **$^1\text{H}$  NMR (400 MHz,  $\text{CDCl}_3$ ):**  $\delta$  8.09 – 8.03 (m, 2H), 7.65 – 7.59 (m, 1H), 7.53 – 7.46 (m, 2H), 5.95 (s, 1H), 4.71 (s, 2H), 1.40 (s, 9H).  **$^{13}\text{C}$  NMR (100 MHz,  $\text{CDCl}_3$ ):**  $\delta$  166.3, 165.3, 133.8, 129.8, 129.2, 128.8, 63.8, 51.6, 28.9. **FT-IR (ATR):** 3312.8, 1718.0, 1653.5, 1507.3, 1456.8, 1419.4, 1118.6, 704.5  $\text{cm}^{-1}$ . **HRMS (ESI, m/z):** calcd for  $\text{C}_{13}\text{H}_{17}\text{NNaO}_3^+$   $[\text{M}+\text{Na}]^+$ : 258.1106, found: 258.1104.

### 2-(*tert*-butylamino)-2-oxoethyl 2-methylbenzoate (**5p**)

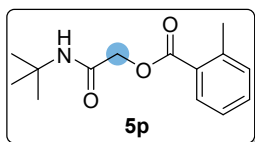

According to the general procedure, **5p** was obtained in 58% yield (29 mg). White solid, **mp**: 98.7 – 99.9 °C.  **$^1\text{H}$  NMR (400 MHz,  $\text{CDCl}_3$ ):**  $\delta$  7.95 – 7.89 (m, 1H), 7.50 – 7.42 (m, 1H), 7.32 – 7.27 (m, 2H), 5.96 (s, 1H), 4.68 (s, 2H), 2.63 (s, 3H), 1.40 (s, 9H).  **$^{13}\text{C}$  NMR (100 MHz,  $\text{CDCl}_3$ ):**  $\delta$  166.4, 166.0, 140.8, 132.8, 132.1, 130.6, 128.6, 126.1, 63.8, 51.6, 28.9, 21.9. **FT-IR (ATR):** 3305.2, 1635.8, 1558.1, 1507.3, 1457.0, 1247.4, 1099.3, 738.2  $\text{cm}^{-1}$ . **HRMS (ESI, m/z):** calcd for  $\text{C}_{14}\text{H}_{19}\text{NNaO}_3^+$   $[\text{M}+\text{Na}]^+$ : 272.1263, found: 272.1268.

### 2-(*tert*-butylamino)-2-oxoethyl 3-methylbenzoate (**5q**)

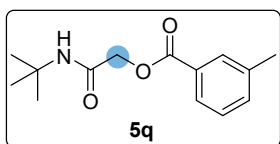

According to the general procedure, **5q** was obtained in 73% yield (36 mg). White solid, **mp**: 93.2 – 94.5 °C.  **$^1\text{H}$  NMR (400 MHz,  $\text{CDCl}_3$ ):**  $\delta$  7.90 – 7.81 (m, 2H), 7.46 – 7.40 (m, 1H), 7.40 – 7.33 (m, 1H), 5.93 (s, 1H), 4.70 (s, 2H), 2.43 (s, 3H), 1.40 (s, 9H).  **$^{13}\text{C}$  NMR (100 MHz,  $\text{CDCl}_3$ ):**  $\delta$  166.4, 165.5, 138.7, 134.6, 130.4, 129.2, 128.7, 126.9, 63.8, 51.6, 28.9, 21.4. **FT-IR (ATR):** 3295.2, 1733.3, 1661.3, 1419.2, 1196.5, 944.9, 747.0  $\text{cm}^{-1}$ . **HRMS (ESI, m/z):** calcd for  $\text{C}_{14}\text{H}_{19}\text{NNaO}_3^+$   $[\text{M}+\text{Na}]^+$ : 272.1263, found: 272.1262.

### 2-(*tert*-butylamino)-2-oxoethyl 4-methylbenzoate (**5r**)

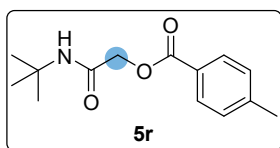

According to the general procedure, **5r** was obtained in 68% yield (34 mg). White solid, **mp**: 104.2 – 105.5 °C.  **$^1\text{H}$  NMR (400 MHz,  $\text{CDCl}_3$ ):**  $\delta$  7.94 (d,  $J$  = 8.3 Hz, 2H), 7.29 (d,  $J$  = 8.0 Hz, 2H), 5.93 (s, 1H), 4.69 (s, 2H), 2.44 (s, 3H), 1.39 (s, 9H).  **$^{13}\text{C}$  NMR (100 MHz,  $\text{CDCl}_3$ ):**  $\delta$  166.4,

165.3, 144.7, 129.8, 129.6, 126.5, 63.7, 51.6, 28.9, 21.9. **FT-IR (ATR):** 3314.6, 1717.4, 1654.7, 1507.4, 1456.9, 1114.9, 756.5  $\text{cm}^{-1}$ . **HRMS (ESI, m/z):** calcd for  $\text{C}_{14}\text{H}_{19}\text{NNaO}_3^+$   $[\text{M}+\text{Na}]^+$ : 272.1263, found: 272.1257.

### 2-(*tert*-butylamino)-2-oxoethyl 4-fluorobenzoate (**5s**)

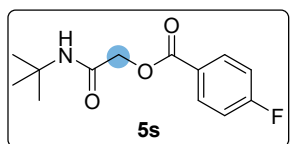

According to the general procedure, **5s** was obtained in 70% yield (36 mg). White solid, **mp**: 99.8-100.9 °C.  **$^1\text{H}$  NMR (400 MHz,  $\text{CDCl}_3$ ):**  $\delta$  8.11 – 8.05 (m, 2H), 7.19 – 7.13 (m, 2H), 5.88 (s, 1H), 4.70 (s, 2H), 1.40 (s, 9H).  **$^{13}\text{C}$  NMR (100 MHz,  $\text{CDCl}_3$ ):**  $\delta$  166.3 (d,  $J = 256.3$  Hz), 166.1, 164.4, 132.4 (d,  $J = 9.5$  Hz), 125.5 (d,  $J = 3.2$  Hz), 116.0 (d,  $J = 22.2$  Hz), 63.9, 51.7, 28.9.  **$^{19}\text{F}$  NMR (376 MHz,  $\text{CDCl}_3$ )**  $\delta$  -104.21. **FT-IR (ATR):** 3314.35, 1720.3, 1661.3, 1507.8, 1394.2, 1116.2, 859.5  $\text{cm}^{-1}$ . **HRMS (ESI, m/z):** calcd for  $\text{C}_{13}\text{H}_{16}\text{FNNaO}_3^+$   $[\text{M}+\text{Na}]^+$ : 276.1012, found: 276.1016.

### 2-(*tert*-butylamino)-2-oxoethyl 4-nitrobenzoate (**5t**)

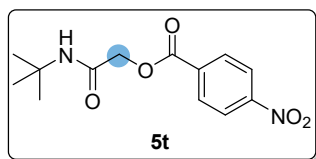

According to the general procedure, **5t** was obtained in 82% yield (46 mg). White solid, **mp**: 109.1 – 110.3 °C.  **$^1\text{H}$  NMR (400 MHz,  $\text{CDCl}_3$ ):**  $\delta$  8.32 – 8.29 (m, 2H), 8.24 – 8.20 (m, 2H), 5.82 (s, 1H), 4.73 (s, 2H), 1.38 (s, 9H).  **$^{13}\text{C}$  NMR (100 MHz,  $\text{CDCl}_3$ ):**  $\delta$  165.4, 163.7, 151.0, 134.7, 131.0, 123.9, 64.3, 51.9, 28.9. **FT-IR (ATR):** 3329.2, 1719.5, 1654.3, 1420.1, 1123.8, 879.3  $\text{cm}^{-1}$ . **HRMS (ESI, m/z):** calcd for  $\text{C}_{13}\text{H}_{16}\text{N}_2\text{NaO}_5^+$   $[\text{M}+\text{Na}]^+$ : 303.0957, found: 303.0957.

### 2-(*tert*-butylamino)-2-oxoethyl furan-2-carboxylate (**5u**)

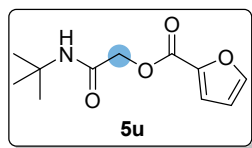

According to the general procedure, **5u** was obtained in 65% yield (29 mg). White solid, **mp**: 60.8 – 61.9 °C.  **$^1\text{H}$  NMR (400 MHz,  $\text{CDCl}_3$ ):**  $\delta$  7.63 (d,  $J = 1.5$  Hz, 1H), 7.28 (d,  $J = 3.6$  Hz, 1H), 6.59 – 6.55 (m, 1H), 5.99 (s, 1H), 4.66 (s, 2H), 1.39 (s, 9H).  **$^{13}\text{C}$  NMR (100 MHz,  $\text{CDCl}_3$ ):**  $\delta$  165.9, 157.1, 147.1, 143.8, 119.3, 112.4, 63.4, 51.6, 28.9. **FT-IR (ATR):** 3312.9, 1732.8, 1670.4, 1457.1, 1127.8, 795.8, 762.7  $\text{cm}^{-1}$ . **HRMS (ESI, m/z):** calcd for  $\text{C}_{11}\text{H}_{15}\text{NNaO}_4^+$   $[\text{M}+\text{Na}]^+$ : 248.0899, found: 248.0900.

### 2-(*tert*-butylamino)-2-oxoethyl thiophene-2-carboxylate (**5v**)

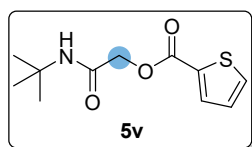

According to the general procedure, **5v** was obtained in 71% yield (34 mg). White solid, **mp**: 86.2 – 87.5 °C.  **$^1\text{H}$  NMR (400 MHz,  $\text{CDCl}_3$ ):**  $\delta$  7.91 – 7.85 (m, 1H), 7.69 – 7.61 (m, 1H), 7.20 – 7.13 (m, 1H), 5.99

(s, 1H), 4.67 (s, 2H), 1.40 (s, 9H).  $^{13}\text{C}$  NMR (100 MHz,  $\text{CDCl}_3$ ):  $\delta$  166.0, 160.6, 134.5, 133.4, 132.3, 128.3, 63.6, 51.6, 28.8. FT-IR (ATR): 3284.5, 1716.2, 1653.8, 1507.3, 1457.1, 1086.2, 750.8, 668.5  $\text{cm}^{-1}$ . HRMS (ESI,  $m/z$ ): calcd for  $\text{C}_{11}\text{H}_{15}\text{NNaO}_3\text{S}^+$   $[\text{M}+\text{Na}]^+$ : 264.0670, found: 264.0673.

#### 2-(benzhydrylamino)acetonitrile (4)

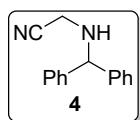

According to the general procedure, **4** was isolated from the reaction system as white powder, mp: 69.1 – 70.3 °C.  $^1\text{H}$  NMR (400 MHz,  $\text{CDCl}_3$ ):  $\delta$  7.44 – 7.37 (m, 4H), 7.32 – 7.25 (m, 4H), 7.25 – 7.18 (m, 2H), 5.03 (s, 1H), 3.42 (s, 2H), 1.91 (s, 1H).  $^{13}\text{C}$  NMR (100 MHz,  $\text{CDCl}_3$ ):  $\delta$  141.9, 128.8, 127.7, 127.2, 117.7, 65.7, 35.2. FT-IR (ATR): 3333.87, 2201.0, 1490.1 1457.6, 1130.7, 743.9  $\text{cm}^{-1}$ . HRMS (ESI,  $m/z$ ): calcd for  $\text{C}_{15}\text{H}_{14}\text{N}_2\text{Na}^+$   $[\text{M}+\text{Na}]^+$ : 245.1055, found: 245.1051.

#### 2,2'-(benzhydrylazanediy)diacetonitrile (9)

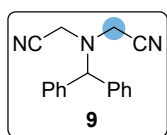

According to the general procedure, **9** was obtained in 87% yield (23 mg). White solid, mp: 142.4 – 143.6 °C.  $^1\text{H}$  NMR (400 MHz,  $\text{CDCl}_3$ ):  $\delta$  7.49 – 7.44 (m, 4H), 7.37 – 7.32 (m, 4H), 7.29 – 7.25 (m, 2H), 4.67 (s, 1H), 3.64 (s, 4H).  $^{13}\text{C}$  NMR (100 MHz,  $\text{CDCl}_3$ ):  $\delta$  139.5, 129.6, 128.7, 127.6, 114.6, 72.0, 40.7. FT-IR (ATR): 2360.2, 1558.5, 1507.3, 1457.0, 668.3  $\text{cm}^{-1}$ . HRMS (ESI,  $m/z$ ): calcd for  $\text{C}_{17}\text{H}_{15}\text{N}_3^+$   $[\text{M}+\text{H}]^+$ : 262.1344, found: 262.1341.

#### bis(1-methyl-1H-indol-3-yl)methane (11)

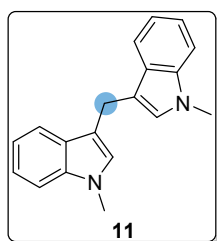

According to the general procedure, **11** was obtained in 74% yield (20 mg). White solid, mp: 86.1 – 87.2 °C.  $^1\text{H}$  NMR (400 MHz,  $\text{CDCl}_3$ ):  $\delta$  7.61 (d,  $J = 7.9$  Hz, 2H), 7.28 (s, 2H), 7.24 – 7.16 (m, 2H), 7.12 – 7.03 (m, 2H), 6.76 (s, 2H), 4.21 (s, 2H), 3.66 (s, 6H).  $^{13}\text{C}$  NMR (100 MHz,  $\text{CDCl}_3$ ):  $\delta$  137.3, 128.1, 127.1, 121.5, 119.4, 118.7, 114.5, 109.2, 32.7, 21.1. FT-IR (ATR): 2922.8, 1471.5, 1325.1, 1236.4, 1125.9, 737.4  $\text{cm}^{-1}$ . HRMS (ESI,  $m/z$ ): calcd for  $\text{C}_{19}\text{H}_{18}\text{N}_2\text{Na}^+$   $[\text{M}+\text{Na}]^+$ : 297.1368, found: 297.1369.

#### *N*-(2-(*tert*-butylamino)-2-oxoethyl)-*N*-phenyl-4-(trifluoromethyl)benzamide (13a)

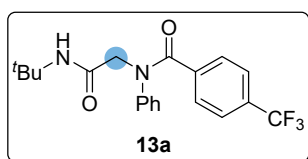

According to the general procedure, **13a** was obtained in 74% yield (56 mg). Yellow oil.  $^1\text{H}$  NMR (400 MHz,  $\text{CDCl}_3$ ):  $\delta$  7.44 (s, 4H), 7.26 – 7.17 (m, 3H), 7.16 – 7.11 (m, 2H), 6.10 (s, 1H), 4.41 (s, 2H), 1.37 (s, 9H).  $^{13}\text{C}$  NMR (100 MHz,  $\text{CDCl}_3$ ):  $\delta$  169.7, 167.4, 143.4, 138.8, 131.8

(q,  $J = 32.7$  Hz), 129.6, 129.2, 127.6, 127.3, 125.0 (q,  $J = 3.9$  Hz), 122.3, 55.7, 51.6, 28.9.  $^{19}\text{F}$  NMR (376 MHz,  $\text{CDCl}_3$ )  $\delta$  -63.02. FT-IR (ATR): 3315.7, 2969.6, 1636.1, 1546.6, 1493.8, 1321.2, 1125.2, 851.5, 764.0  $\text{cm}^{-1}$ . HRMS (ESI,  $m/z$ ): calcd for  $\text{C}_{20}\text{H}_{22}\text{F}_3\text{N}_2\text{O}_2^+$   $[\text{M}+\text{H}]^+$ : 379.1633, found: 379.1645.

#### *N*-(2-(*tert*-butylamino)-2-oxoethyl)-*N*-phenylfuran-2-carboxamide (13b)

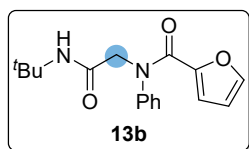

According to the general procedure, **13b** was obtained in 60% yield (36 mg). White solid, mp: 128.5 – 129.4 °C.  $^1\text{H}$  NMR (400 MHz,  $\text{CDCl}_3$ ):  $\delta$  7.46 – 7.35 (m, 4H), 7.30 – 7.26 (m, 2H), 6.37 (s, 1H), 6.22 (dd,  $J = 3.6, 1.7$  Hz, 1H), 5.78 (d,  $J = 3.6$  Hz, 1H), 4.34 (s, 2H), 1.36 (s, 9H).  $^{13}\text{C}$  NMR (100 MHz,  $\text{CDCl}_3$ ):  $\delta$  167.7, 159.9, 146.3, 145.0, 142.9, 129.9, 128.6, 128.0, 117.6, 111.3, 56.2, 51.4, 28.8. FT-IR (ATR): 3308.0, 2971.7, 1650.0, 1554.8, 1495.2, 740.3, 698.1  $\text{cm}^{-1}$ . HRMS (ESI,  $m/z$ ): calcd for  $\text{C}_{17}\text{H}_{20}\text{N}_2\text{NaO}_3^+$   $[\text{M}+\text{Na}]^+$ : 323.1372, found: 323.1370.

#### *N*-(2-(*tert*-butylamino)-2-oxoethyl)-*N*-phenylbenzamide (13c)

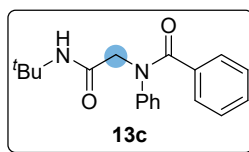

According to the general procedure, **13c** was obtained in 84% yield (53 mg). White solid, mp: 129.1 – 130.3 °C.  $^1\text{H}$  NMR (400 MHz,  $\text{CDCl}_3$ ):  $\delta$  7.34 – 7.27 (m, 2H), 7.24 – 7.09 (m, 8H), 6.29 (s, 1H), 4.42 (s, 2H), 1.37 (s, 9H).  $^{13}\text{C}$  NMR (100 MHz,  $\text{CDCl}_3$ ):  $\delta$  171.2, 168.0, 143.9, 135.2, 130.2, 129.4, 128.9, 128.0, 127.2, 127.1, 56.0, 51.5, 28.9. FT-IR (ATR): 3312.5, 2965.0, 1645.8, 1594.0, 1542.1, 1496.3, 1268.8, 696.0  $\text{cm}^{-1}$ . HRMS (ESI,  $m/z$ ): calcd for  $\text{C}_{19}\text{H}_{22}\text{N}_2\text{NaO}_2^+$   $[\text{M}+\text{Na}]^+$ : 333.1579, found: 333.1583.

#### *N*-(2-(*tert*-butylamino)-2-oxoethyl)-*N*-phenylcyclohexancarboxamide (13d)

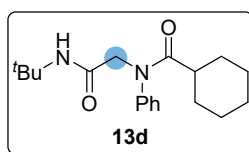

According to the general procedure, **13d** was obtained in 31% yield (20 mg). Light yellow solid, mp: 74.7 – 75.8 °C.  $^1\text{H}$  NMR (400 MHz,  $\text{CDCl}_3$ ):  $\delta$  7.44 – 7.34 (m, 3H), 7.23 – 7.19 (m, 2H), 6.38 (s, 1H), 4.14 (s, 2H), 2.29 – 2.17 (m, 1H), 1.71 – 1.64 (m, 4H), 1.59 – 1.48 (m, 3H), 1.35 (s, 9H), 1.23 – 1.13 (m, 1H), 1.04 – 0.92 (m, 2H).  $^{13}\text{C}$  NMR (100 MHz,  $\text{CDCl}_3$ ):  $\delta$  177.5, 168.6, 143.0, 130.0, 128.4, 127.5, 55.4, 51.2, 41.4, 29.4, 28.8, 25.6, 25.5. FT-IR (ATR): 3327.8, 2926.1, 1684.1, 1632.4, 1543.8, 1492.8, 1260.6, 701.0  $\text{cm}^{-1}$ . HRMS (ESI,  $m/z$ ): calcd for  $\text{C}_{19}\text{H}_{29}\text{N}_2\text{O}_2^+$   $[\text{M}+\text{H}]^+$ : 317.2229, found: 317.2228.

### *N*-(2-(butylamino)-2-oxoethyl)-*N*-phenylbenzamide (**13e**)

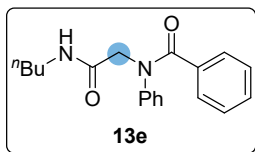

According to the general procedure, **13e** was obtained in 70% yield (43 mg). Yellow oil.  $^1\text{H NMR}$  (400 MHz,  $\text{CDCl}_3$ ):  $\delta$  7.36 – 7.30 (m, 2H), 7.28 – 7.07 (m, 8H), 6.58 (s, 1H), 4.51 (s, 2H), 3.32 – 3.24 (m, 2H), 1.54 – 1.46 (m, 2H), 1.38 – 1.31 (m, 2H), 0.91 (t,  $J = 7.3$  Hz, 3H).  $^{13}\text{C NMR}$  (100 MHz,  $\text{CDCl}_3$ ):  $\delta$  171.3, 168.7, 143.9, 135.0, 130.3, 129.4, 129.0, 127.9, 127.2, 127.1, 55.2, 39.4, 31.7, 20.1, 13.8. **FT-IR (ATR)**: 3306.6, 2957.3, 1630.5, 1595.0, 1547.8, 1492.0, 1225.6, 728.3, 695.7  $\text{cm}^{-1}$ . **HRMS (ESI,  $m/z$ )**: calcd for  $\text{C}_{19}\text{H}_{22}\text{N}_2\text{NaO}_2^+$  [ $\text{M}+\text{Na}$ ] $^+$ : 333.1579, found: 333.1587.

### *N*-(2-(*tert*-butylamino)-2-oxoethyl)-4-methyl-*N*-phenylbenzamide (**13f**)

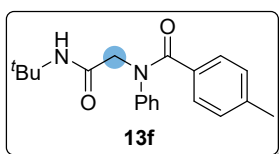

According to the general procedure, **13f** was obtained in 64% yield (42 mg). Yellow oil.  $^1\text{H NMR}$  (400 MHz,  $\text{CDCl}_3$ ):  $\delta$  7.24 – 7.19 (m, 4H), 7.17 – 7.13 (m, 1H), 7.12 – 7.08 (m, 2H), 6.97 (d,  $J = 8.0$  Hz, 2H), 6.35 (s, 1H), 4.41 (s, 2H), 2.26 (s, 3H), 1.36 (s, 9H).  $^{13}\text{C NMR}$  (100 MHz,  $\text{CDCl}_3$ ):  $\delta$  171.2, 168.1, 144.1, 140.6, 132.1, 129.4, 129.1, 128.6, 127.2, 127.0, 56.1, 51.4, 28.9, 21.5. **FT-IR (ATR)**: 3316.3, 2967.9, 1736.8, 1631.1, 1595.4, 1544.1, 1493.1, 1237.0, 829.5, 756.1, 697.9  $\text{cm}^{-1}$ . **HRMS (ESI,  $m/z$ )**: calcd for  $\text{C}_{20}\text{H}_{24}\text{N}_2\text{NaO}_2^+$  [ $\text{M}+\text{Na}$ ] $^+$ : 347.1735, found: 347.1743.

### *N*-(2-((4-methoxyphenyl)amino)-2-oxoethyl)-*N*-phenylbenzamide (**13g**)

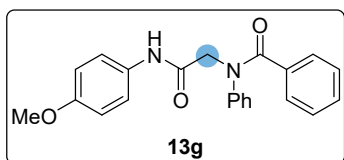

According to the general procedure, **13g** was obtained in 36% yield (26 mg). Brown solid, **mp**: 157.8 – 158.9  $^{\circ}\text{C}$ .  $^1\text{H NMR}$  (400 MHz,  $\text{CDCl}_3$ ):  $\delta$  8.68 (s, 1H), 7.46 – 7.39 (m, 2H), 7.38 – 7.32 (m, 2H), 7.28 – 7.19 (m, 4H), 7.19 – 7.13 (m, 4H), 6.84 – 6.78 (m, 2H), 4.66 (s, 2H), 3.77 (s, 3H).  $^{13}\text{C NMR}$  (100 MHz,  $\text{CDCl}_3$ ):  $\delta$  171.8, 166.8, 156.5, 143.8, 134.8, 134.7, 131.1, 130.5, 129.5, 129.1, 128.0, 127.4, 121.8, 114.2, 56.2, 55.6. **FT-IR (ATR)**: 3312.9, 2952.6, 1685.4, 1619.3, 1544.0, 1508.5, 831.7, 724.1, 696.6  $\text{cm}^{-1}$ . **HRMS (ESI,  $m/z$ )**: calcd for  $\text{C}_{22}\text{H}_{20}\text{N}_2\text{NaO}_3^+$  [ $\text{M}+\text{Na}$ ] $^+$ : 383.1372, found: 383.1362.



### *N*-(2-(*tert*-butylamino)-2-oxoethyl)-*N*-(*o*-tolyl)benzamide (**13h**)

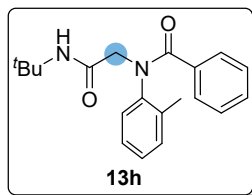

According to the general procedure, **13h** was obtained in 62% yield (40 mg). White solid, mp: 140.3 – 141.4 °C. <sup>1</sup>H NMR (400 MHz, CDCl<sub>3</sub>): δ 7.31 – 7.27 (m, 2H), 7.25 – 7.21 (m, 1H), 7.19 – 7.08 (m, 6H), 6.66 (s, 1H), 4.61 (d, *J* = 14.4 Hz, 1H), 3.98 (d, *J* = 14.5 Hz, 1H), 2.16 (s, 3H), 1.39 (s, 9H). <sup>13</sup>C NMR (100 MHz, CDCl<sub>3</sub>): δ 171.4, 167.9, 142.4, 135.0, 134.7, 131.5, 130.3, 129.0, 128.5, 128.3, 127.8, 127.2, 56.1, 51.4, 28.9, 18.0. FT-IR (ATR): 3323.5, 2963.9, 1662.3, 1651.3, 1541.6, 1221.0, 749.8, 701.0 cm<sup>-1</sup>. HRMS (ESI, *m/z*): calcd for C<sub>20</sub>H<sub>24</sub>N<sub>2</sub>NaO<sub>2</sub><sup>+</sup> [*M*+Na]<sup>+</sup>: 347.1735, found: 347.1727.

### *N*-(2-(*tert*-butylamino)-2-oxoethyl)-*N*-(4-fluorophenyl)benzamide (**13i**)

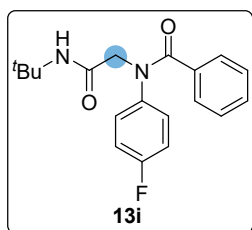

According to the general procedure, **13i** was obtained in 62% yield (40 mg). Yellow oil. <sup>1</sup>H NMR (400 MHz, CDCl<sub>3</sub>): δ 7.32 – 7.25 (m, 3H), 7.22 – 7.17 (m, 2H), 7.14 – 7.08 (m, 2H), 6.93 – 6.87 (m, 2H), 6.24 (s, 1H), 4.37 (s, 2H), 1.37 (s, 9H). <sup>13</sup>C NMR (100 MHz, CDCl<sub>3</sub>): δ 171.2, 167.8, 161.2 (d, *J* = 247.7 Hz), 140.0 (d, *J* = 3.2 Hz), 135.0, 130.2, 129.1 (d, *J* = 8.5 Hz), 128.8, 128.1, 116.2 (d, *J* = 22.8 Hz), 55.9, 51.5, 28.9. <sup>19</sup>F NMR (376 MHz, CDCl<sub>3</sub>) δ -114.22. FT-IR (ATR): 3311.0, 2965.3, 1671.4, 1642.1, 1509.1, 1216.5, 845.9, 722.8, 696.2 cm<sup>-1</sup>. HRMS (ESI, *m/z*): calcd for C<sub>19</sub>H<sub>21</sub>FN<sub>2</sub>NaO<sub>2</sub><sup>+</sup> [*M*+Na]<sup>+</sup>: 351.1485, found: 351.1475.

### *N*-(2-(*tert*-butylamino)-2-oxoethyl)-*N*-(4-chlorophenyl)benzamide (**13j**)

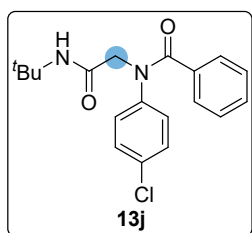

According to the general procedure, **13j** was obtained in 65% yield (45 mg). Light yellow oil. <sup>1</sup>H NMR (400 MHz, CDCl<sub>3</sub>): δ 7.33 – 7.27 (m, 3H), 7.23 – 7.15 (m, 4H), 7.10 – 7.03 (m, 2H), 6.19 (s, 1H), 4.37 (s, 2H), 1.36 (s, 9H). <sup>13</sup>C NMR (100 MHz, CDCl<sub>3</sub>): δ 171.1, 167.7, 142.6, 134.8, 132.7, 130.4, 129.5, 128.9, 128.5, 128.1, 55.7, 51.6, 28.9. FT-IR (ATR): 3329.5, 2965.2, 1664.8, 1649.0, 1575.5, 1491.8, 1221.0, 841.4, 714.6, 698.0 cm<sup>-1</sup>. HRMS (ESI, *m/z*): calcd for C<sub>19</sub>H<sub>21</sub>ClN<sub>2</sub>NaO<sub>2</sub><sup>+</sup> [*M*+Na]<sup>+</sup>: 367.1189, found: 367.1179.



## 6. $^1\text{H}$ , $^{13}\text{C}$ and $^{19}\text{F}$ NMR spectra of new substrates and all products

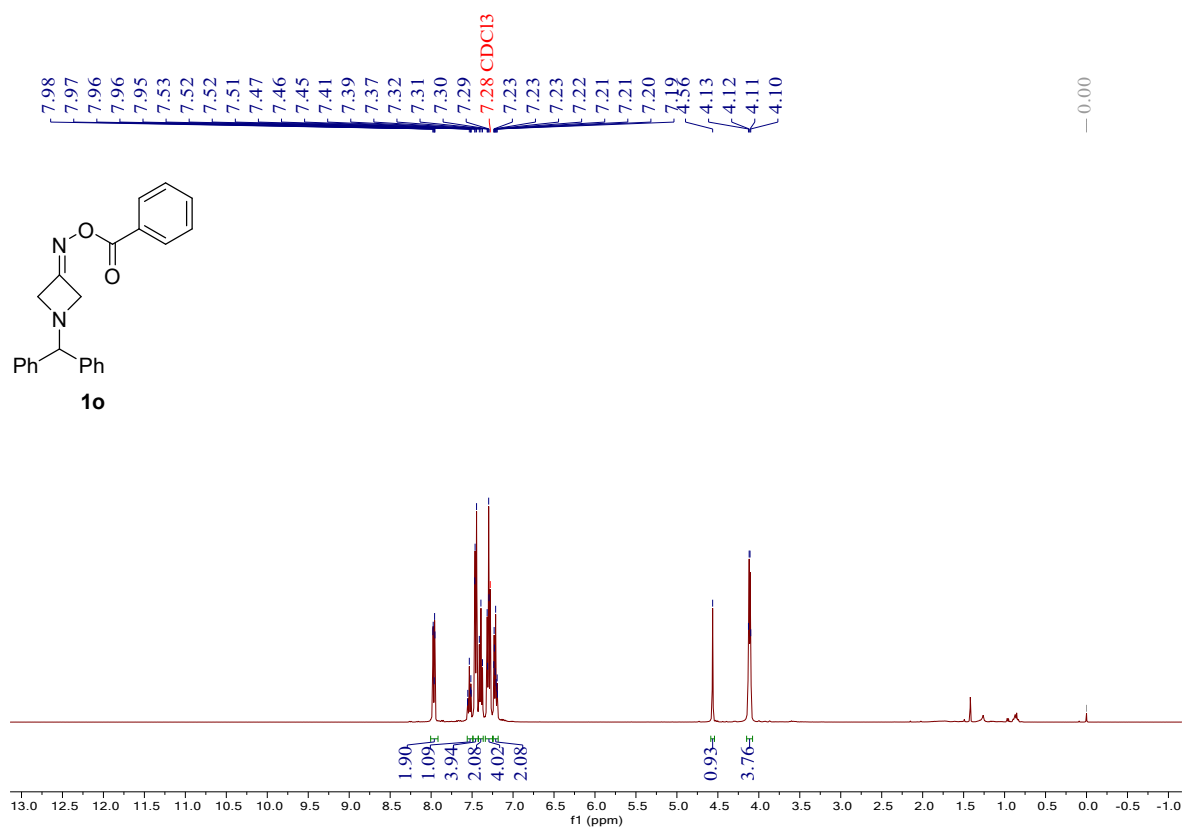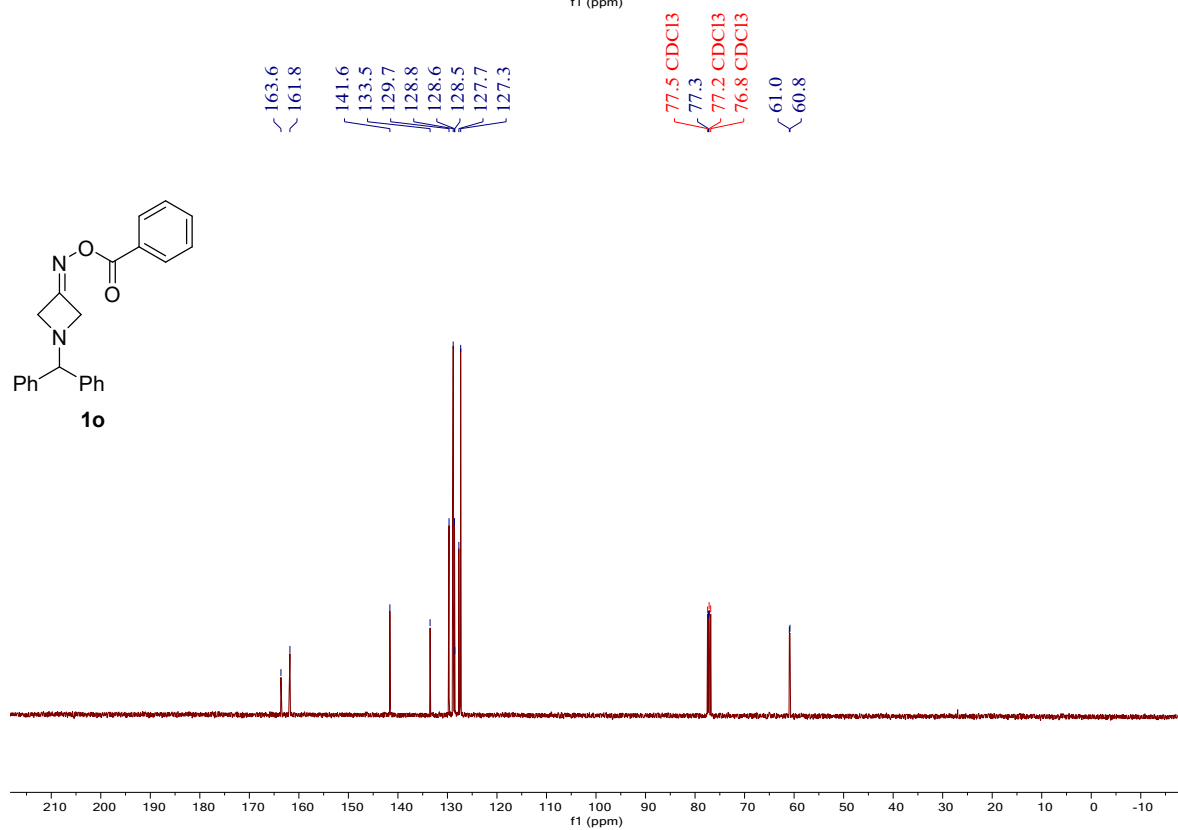

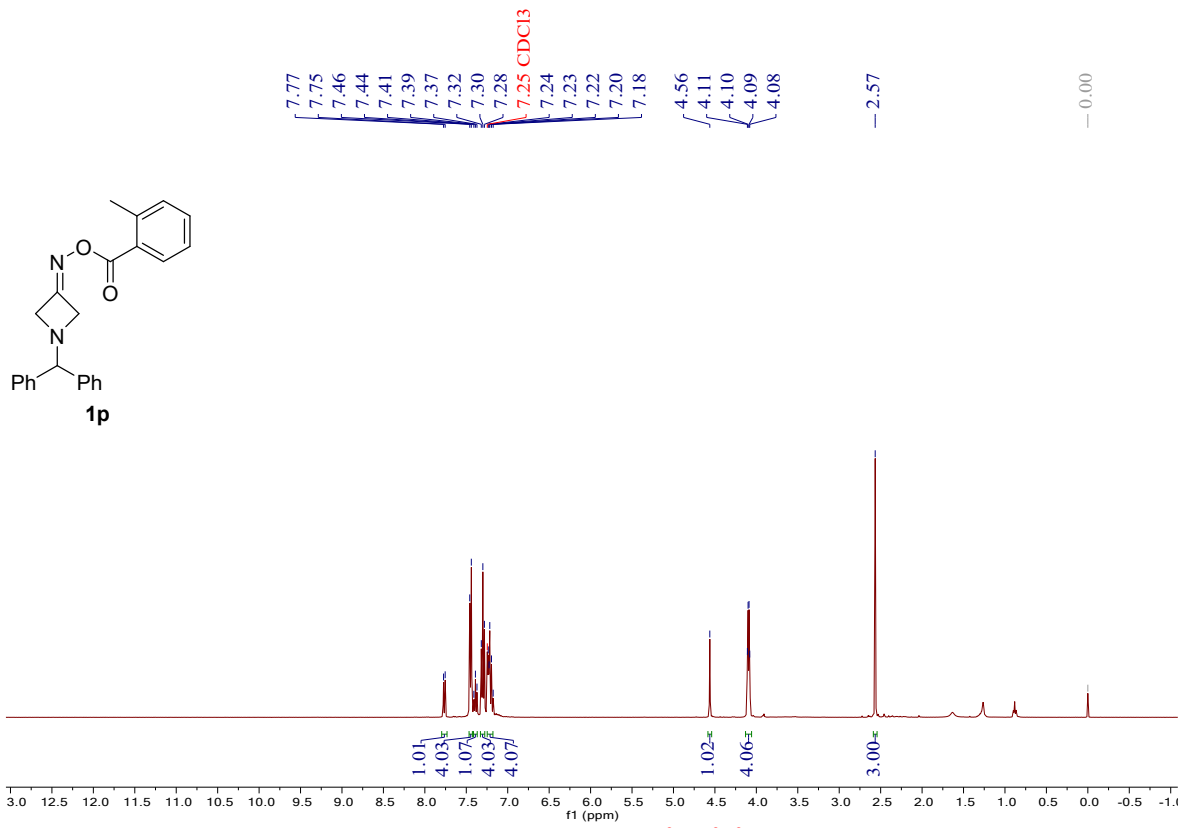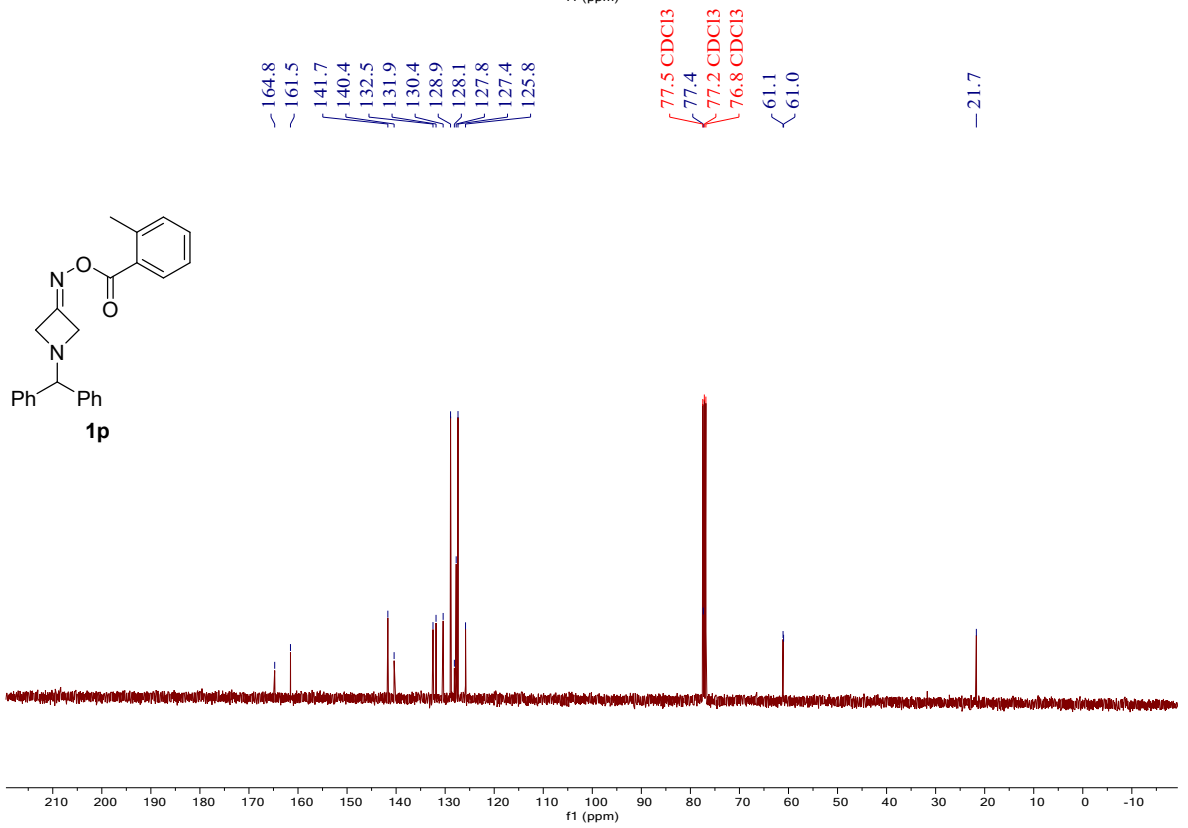

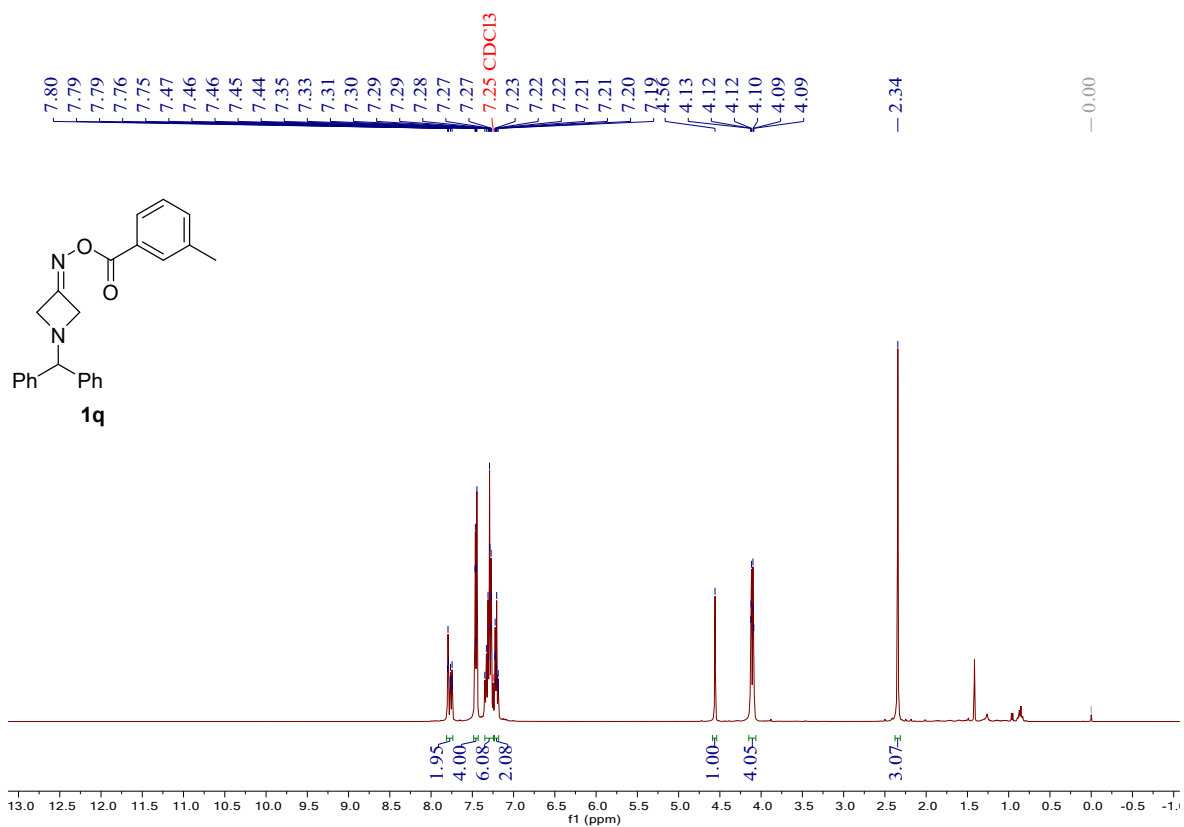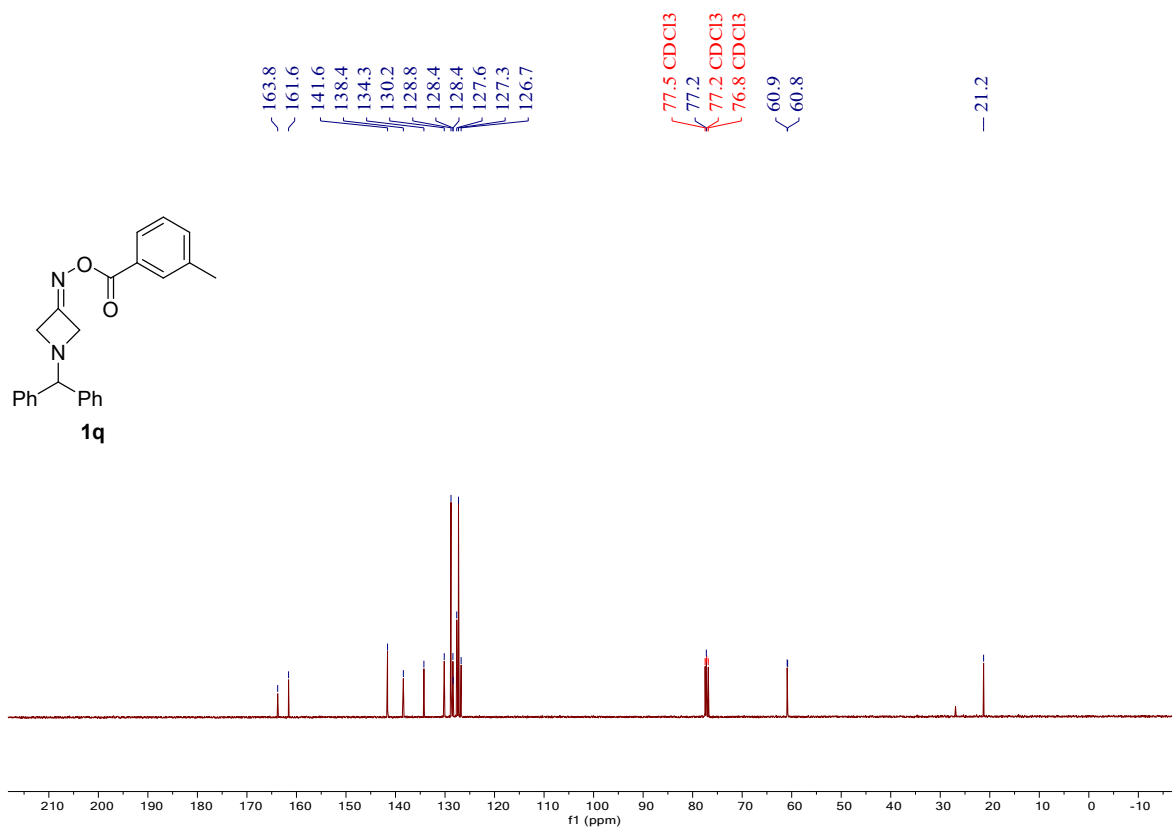

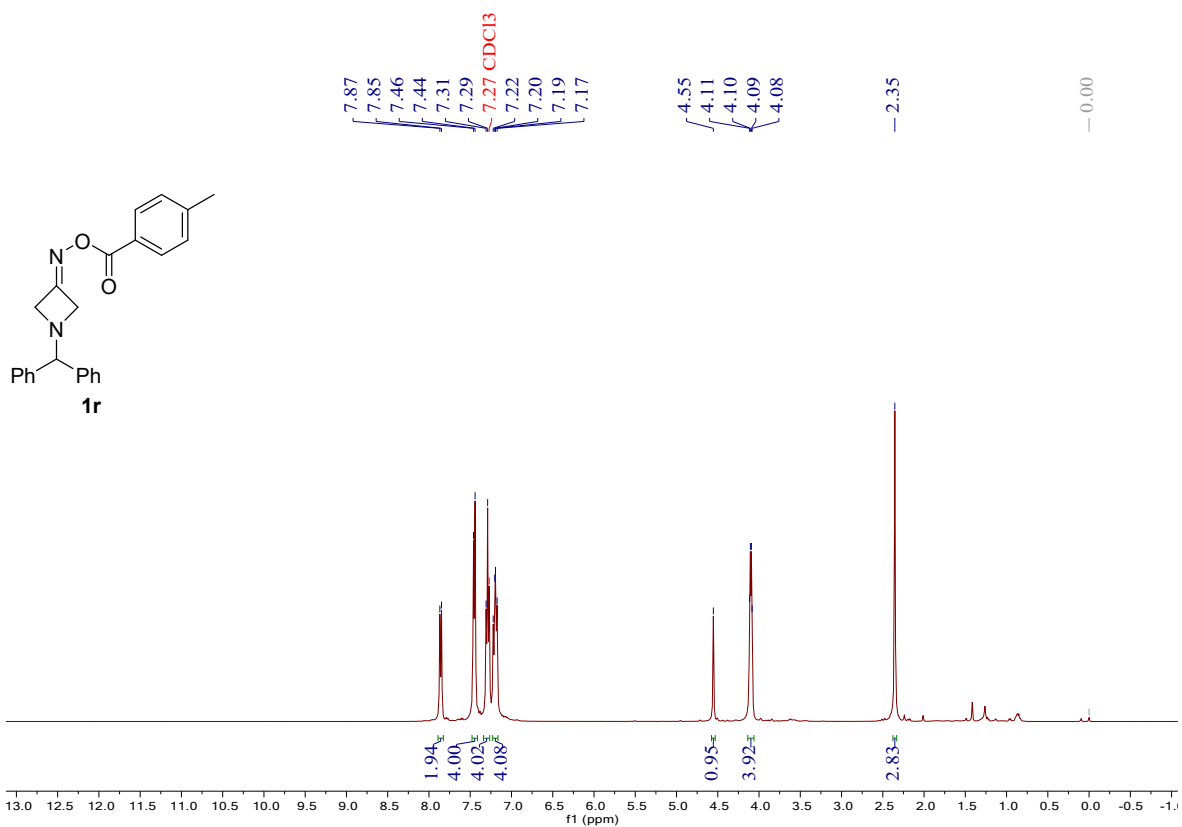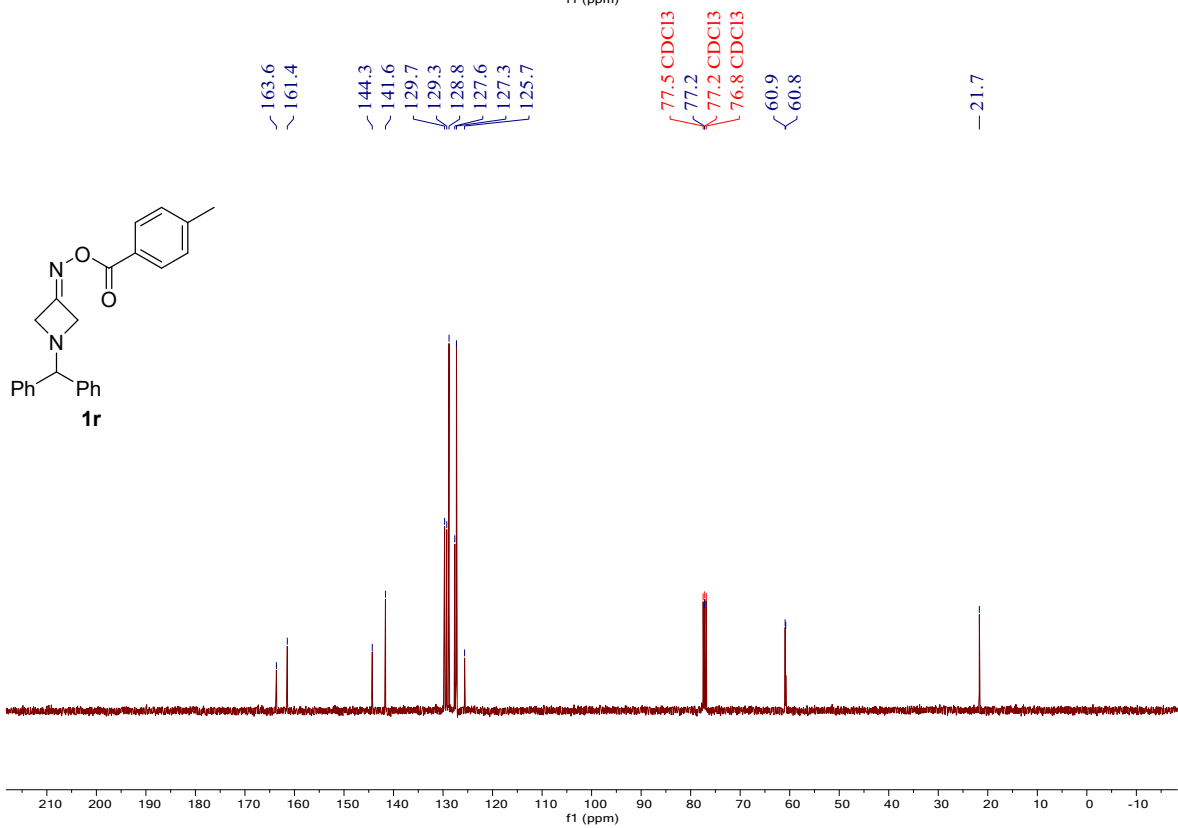

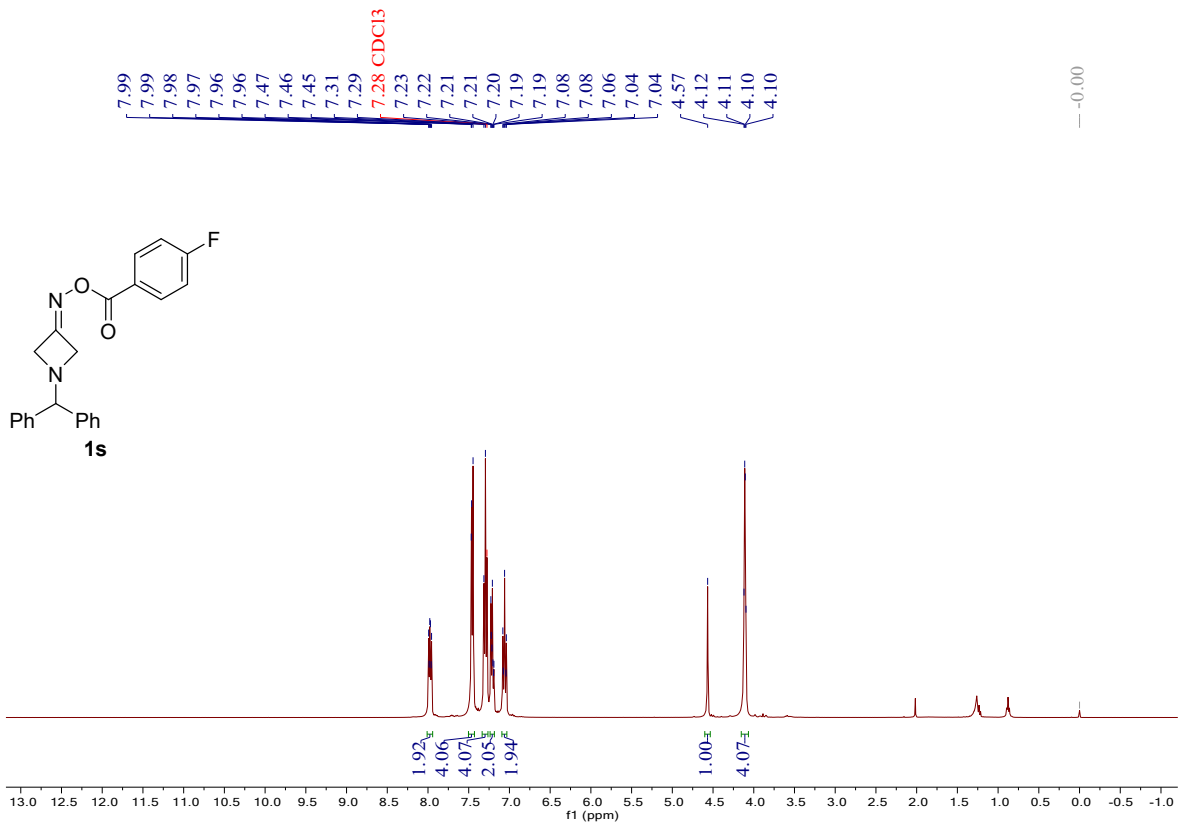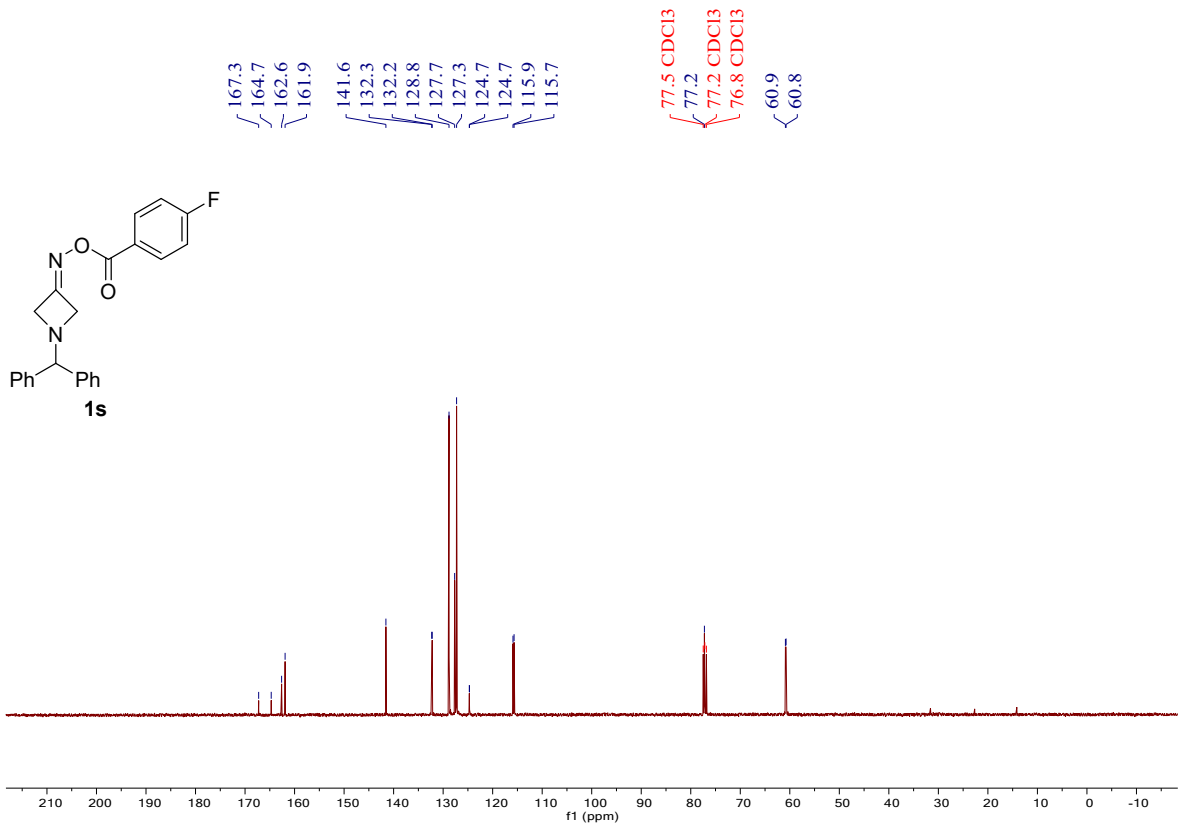

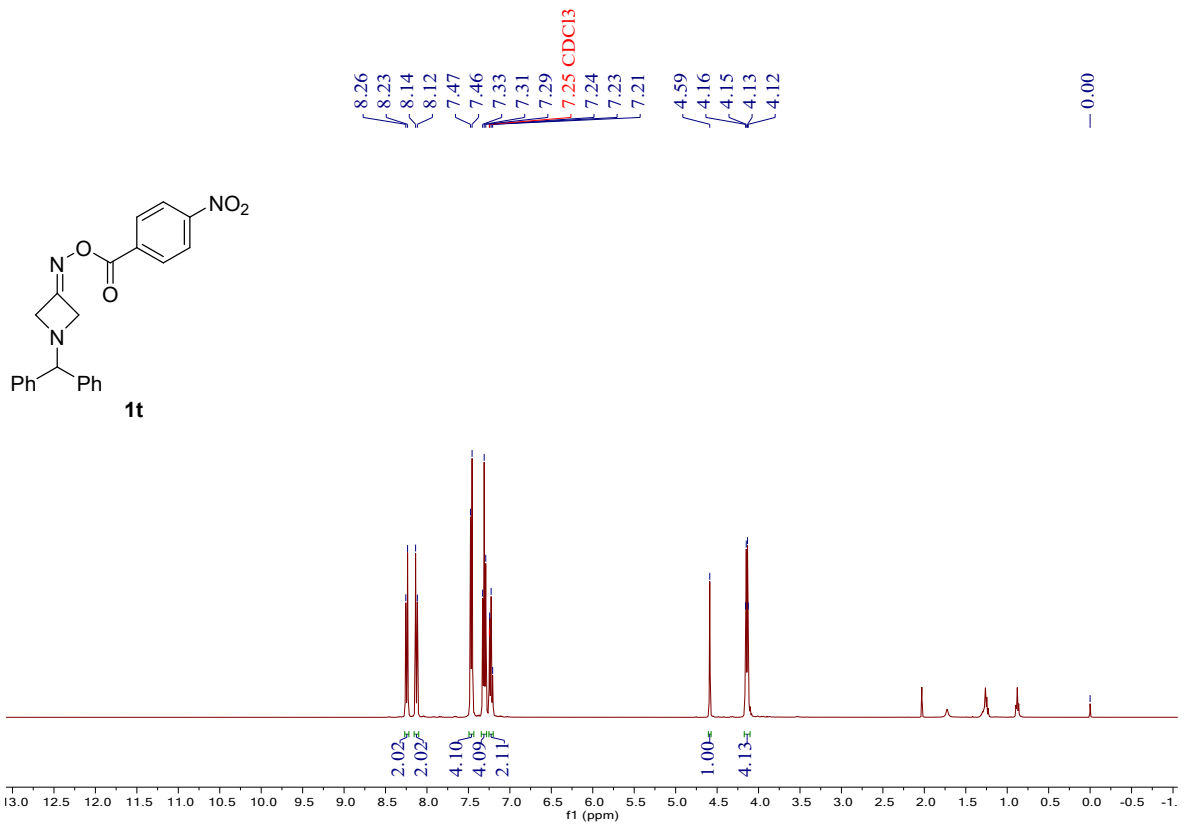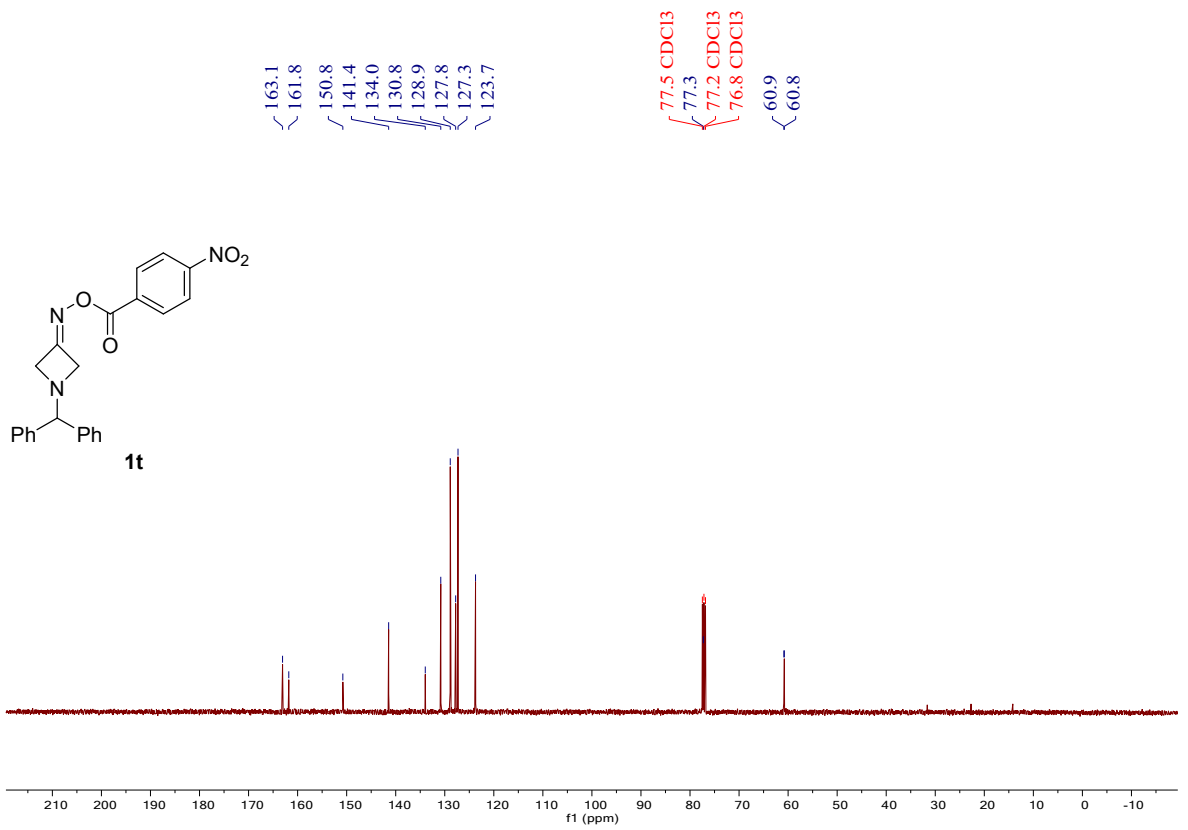

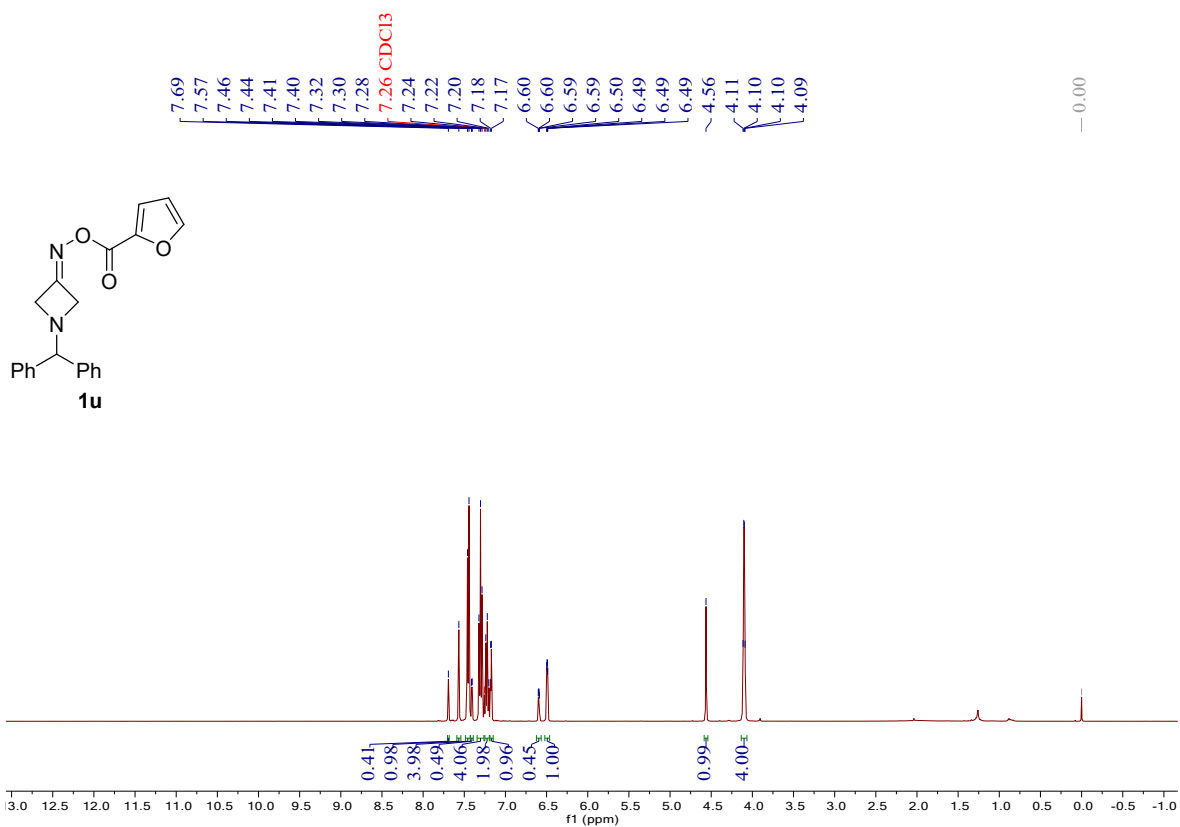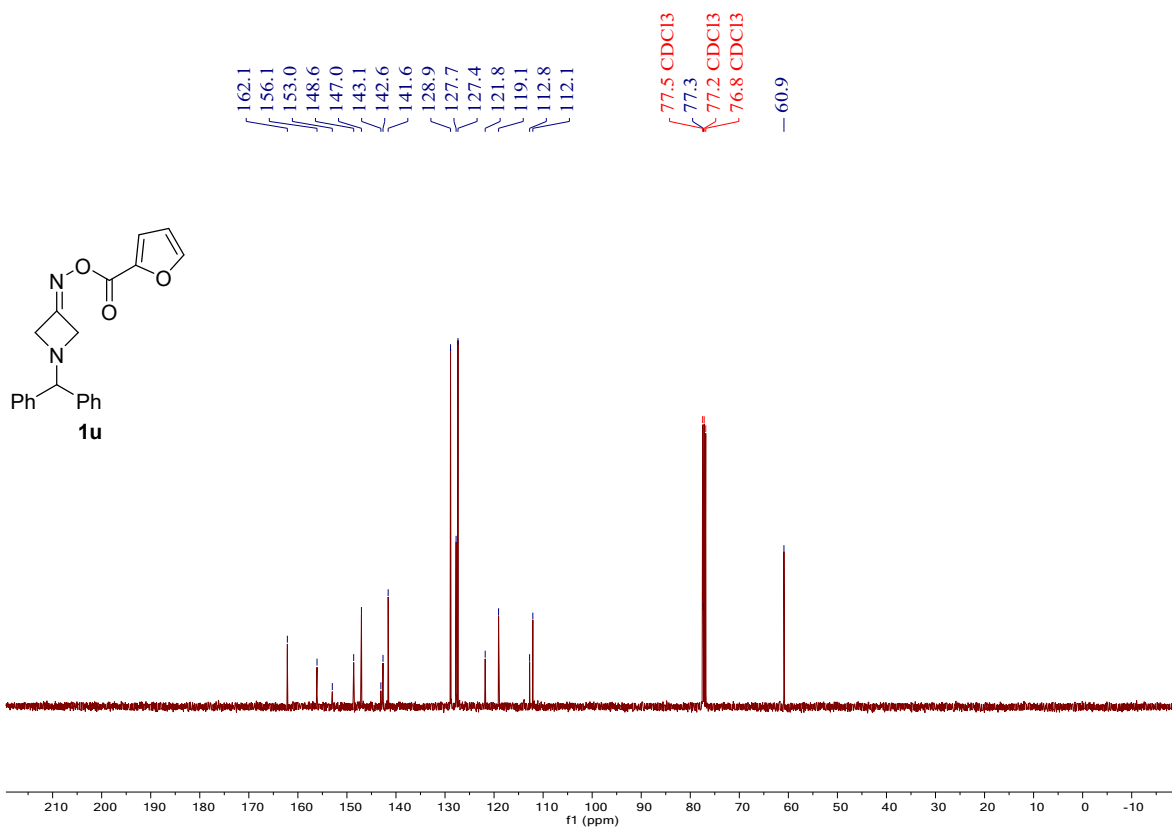

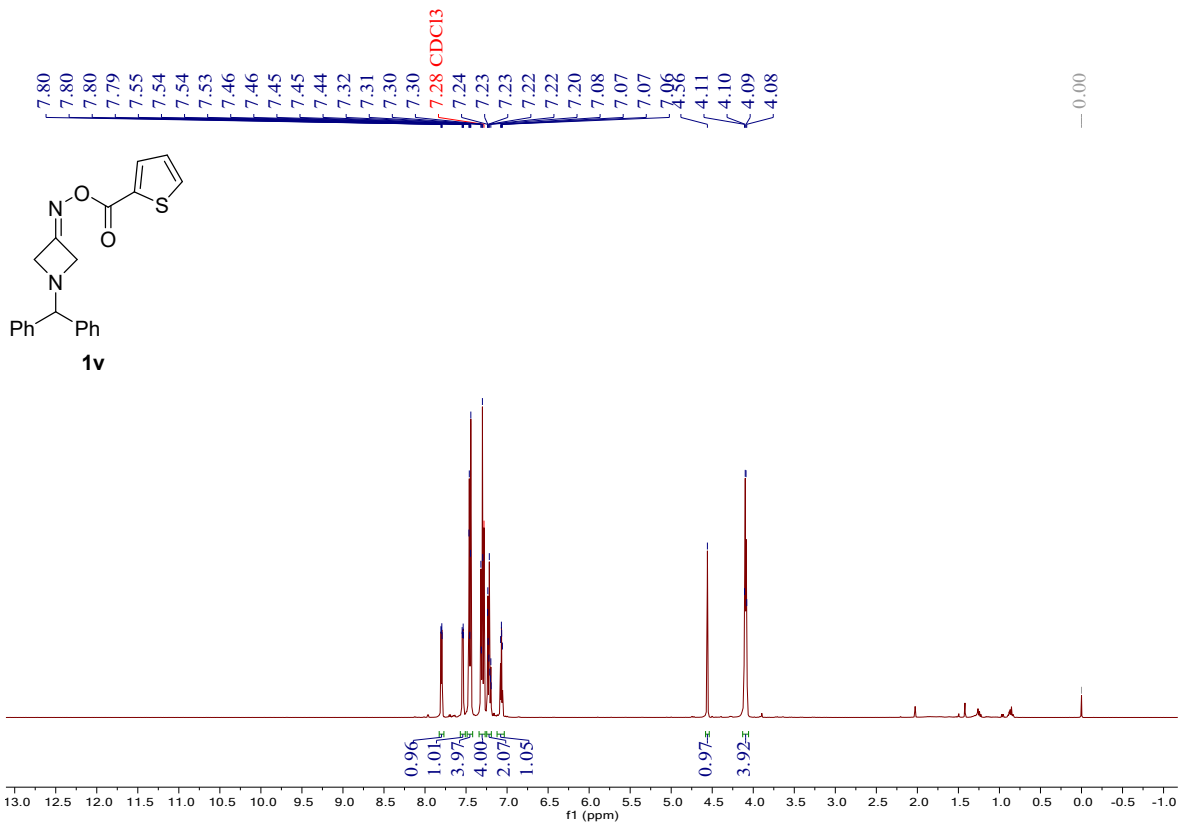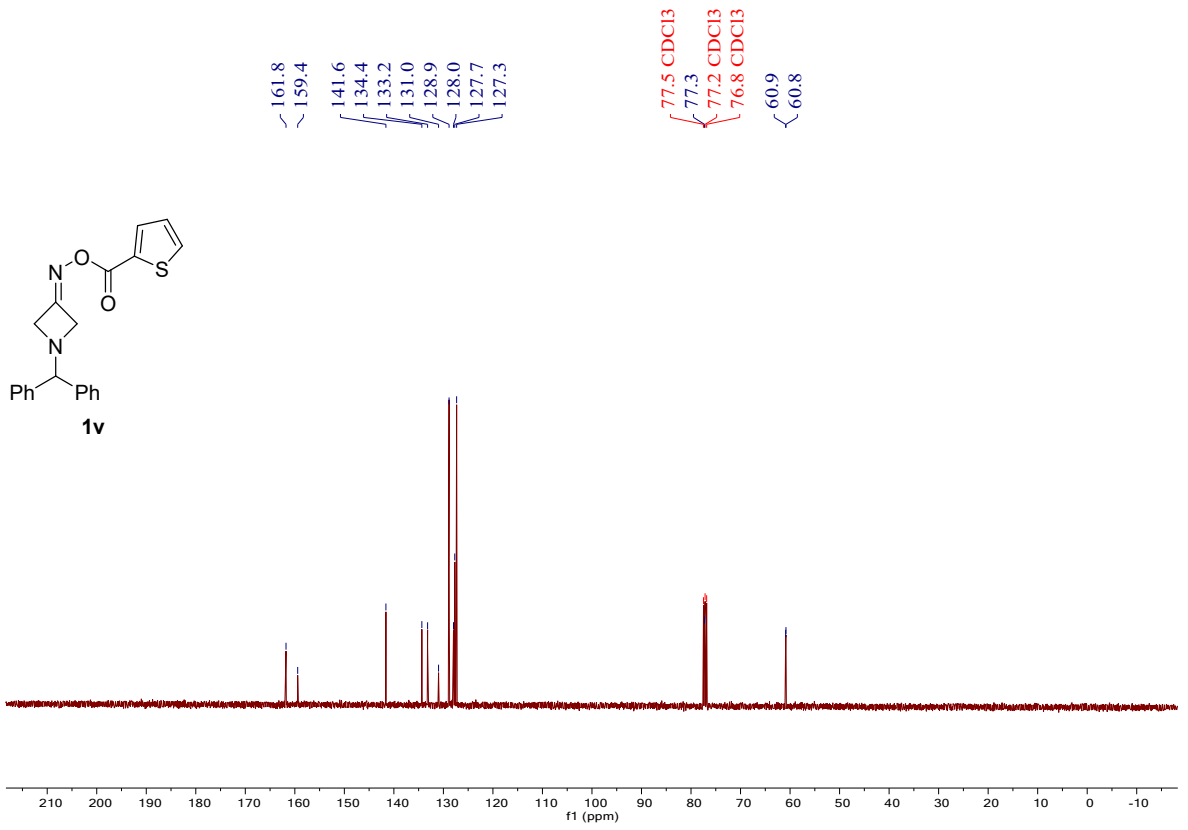



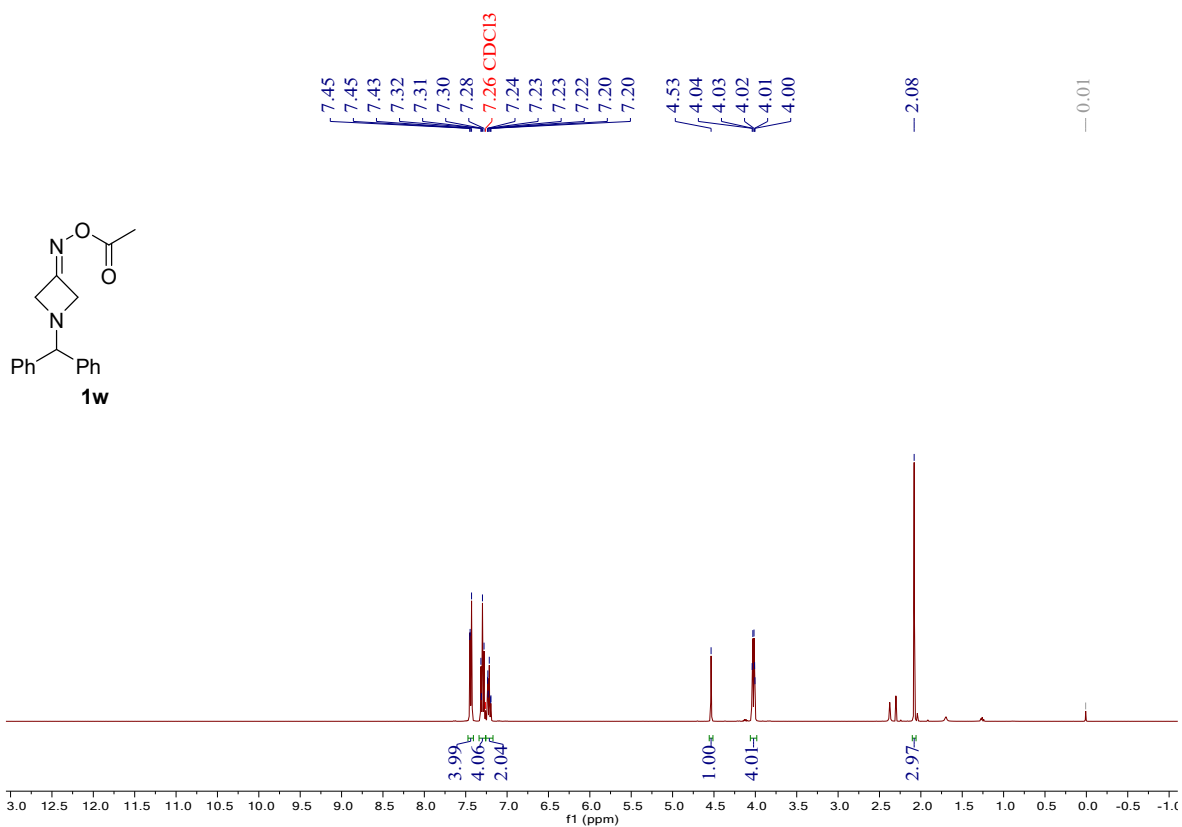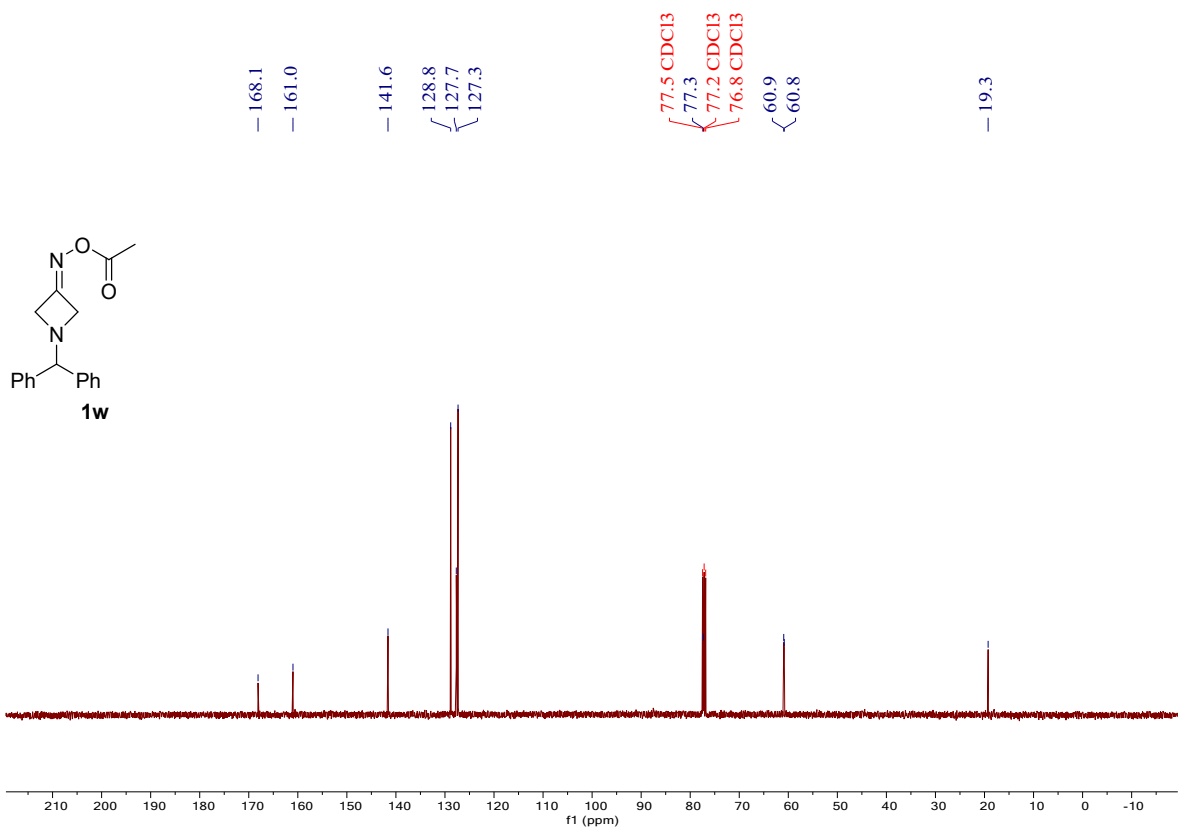

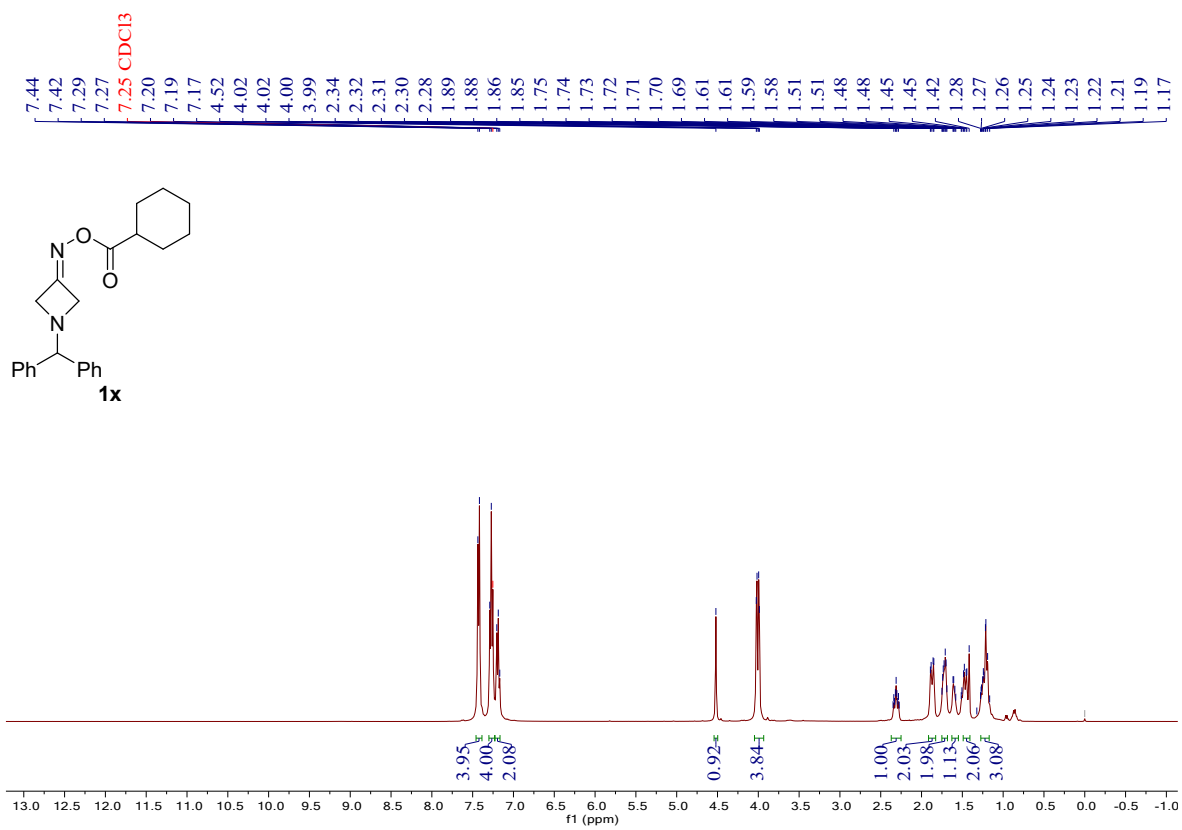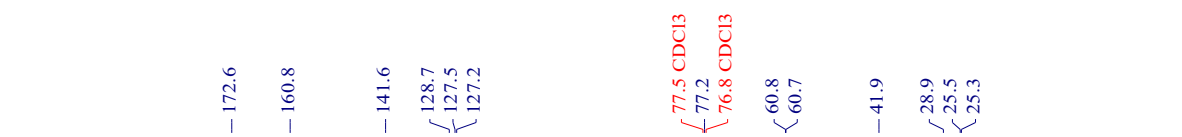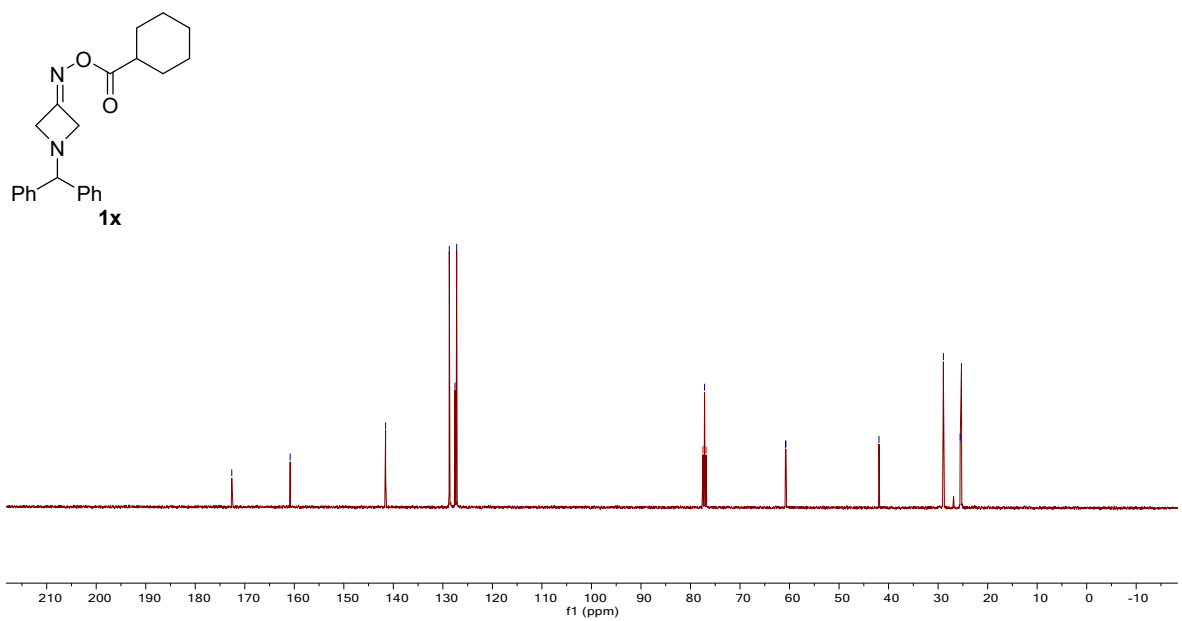

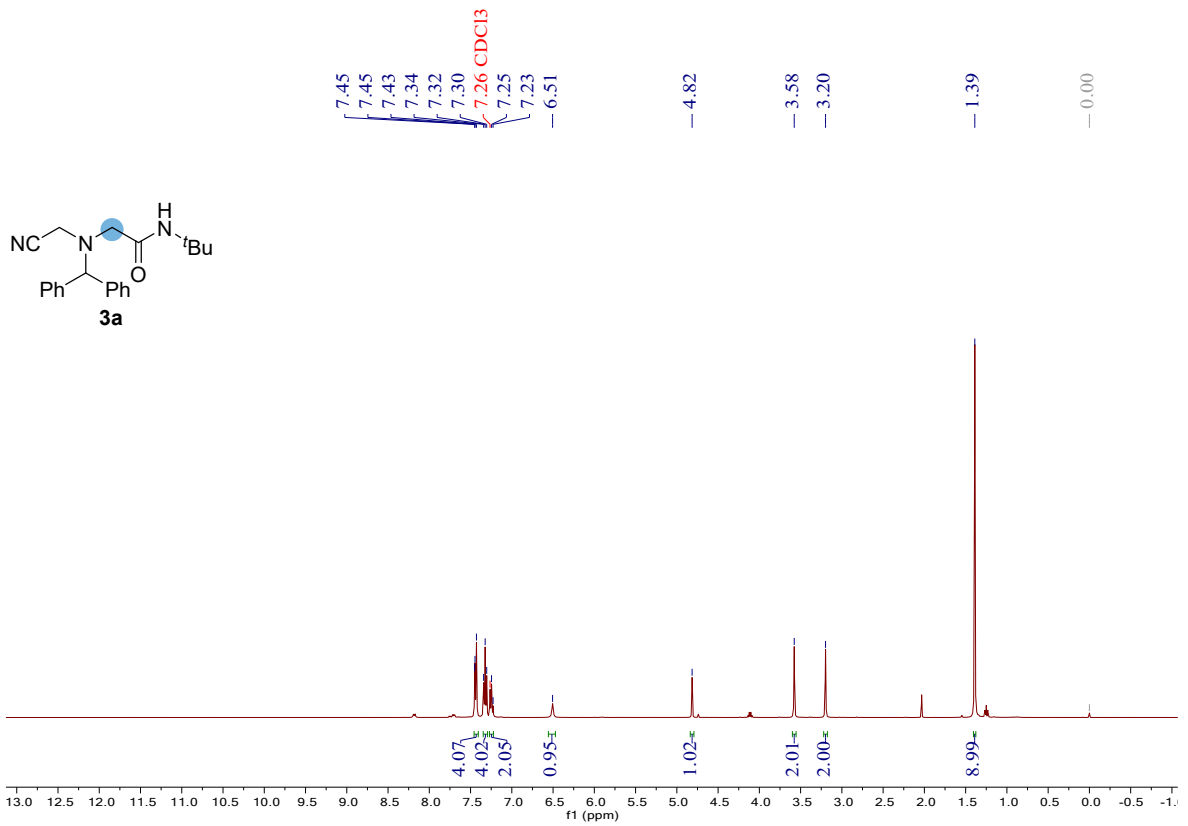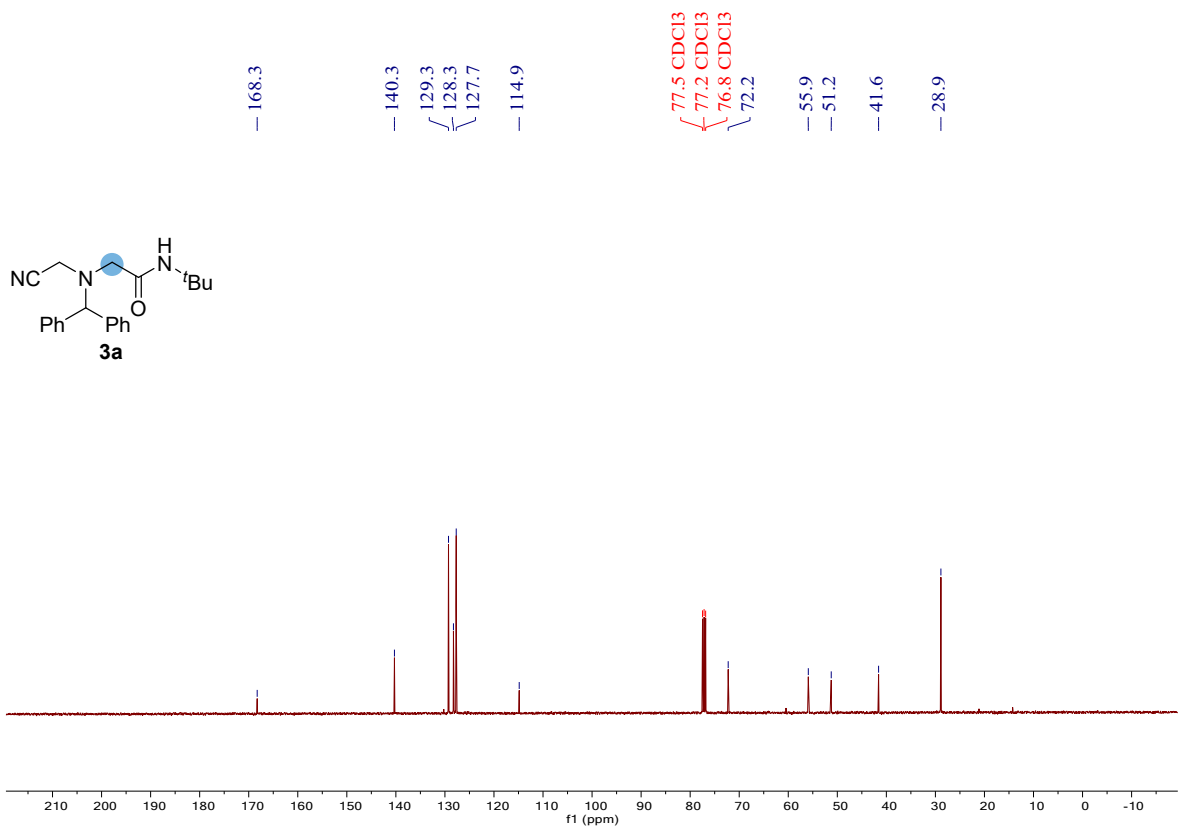

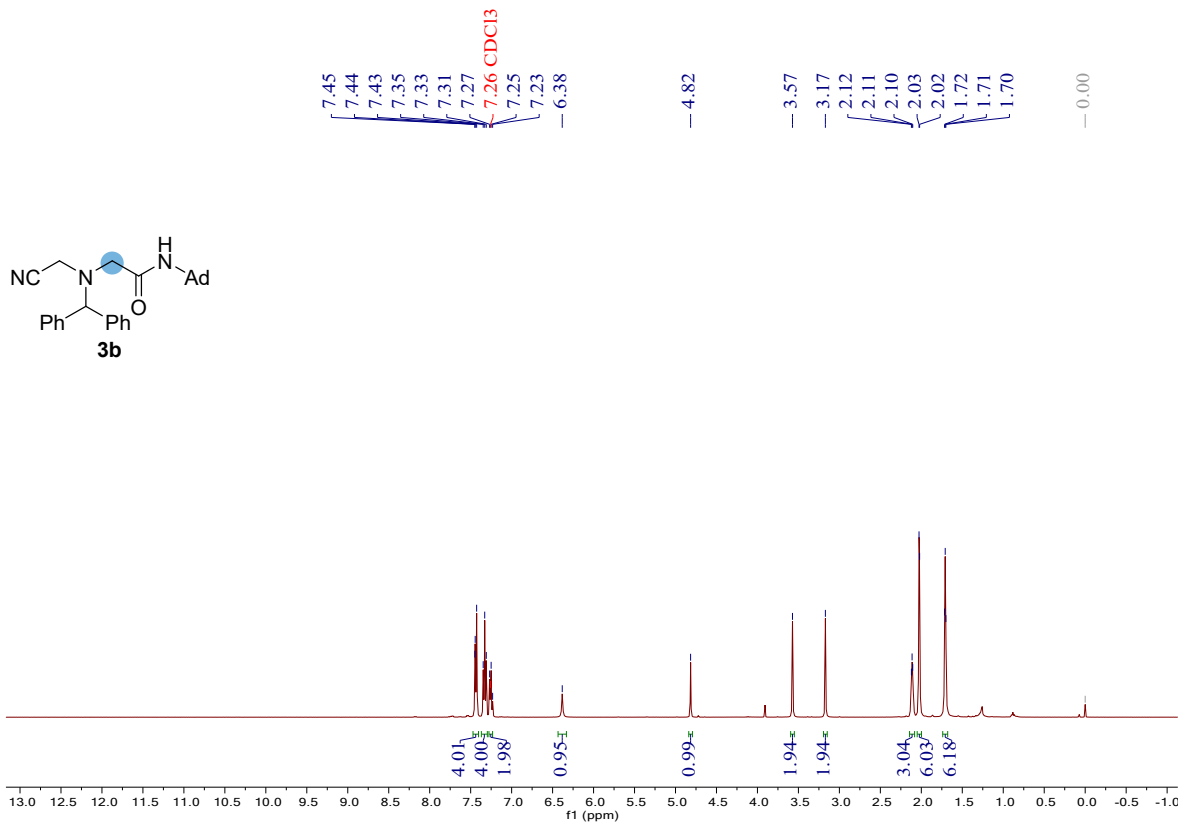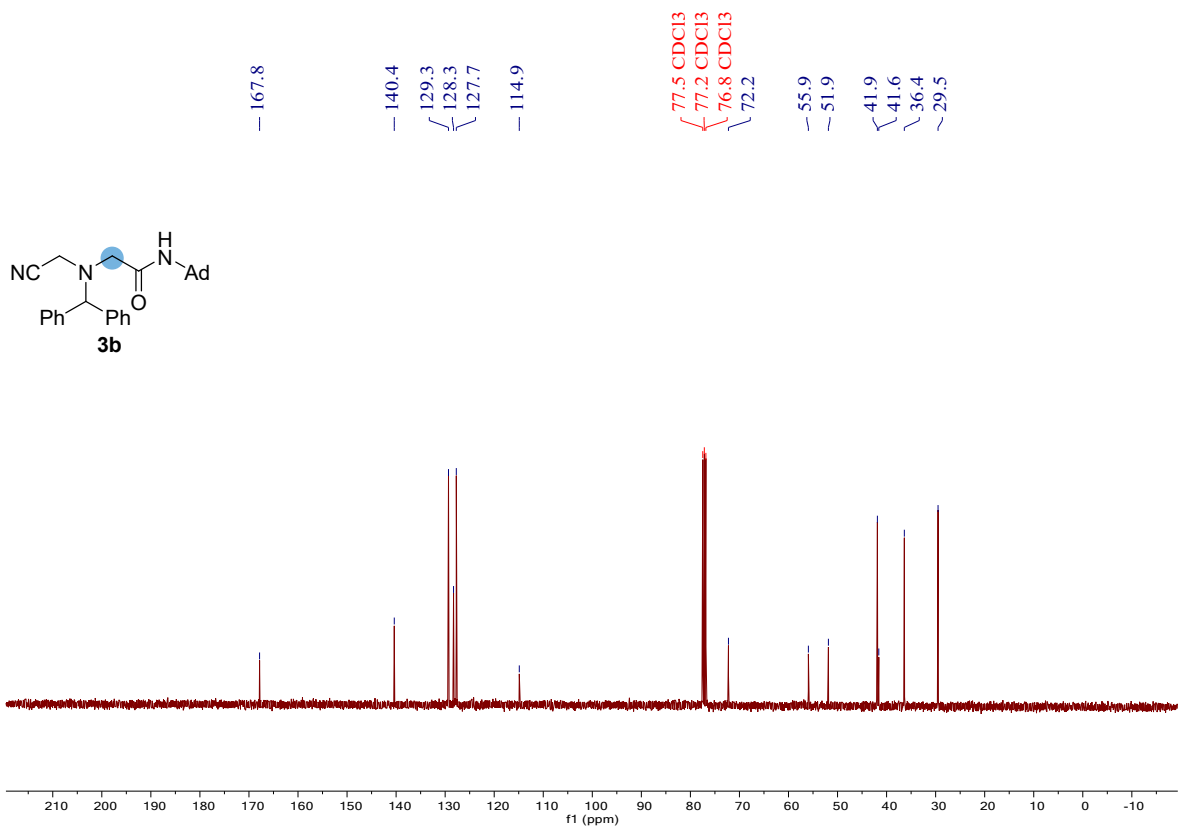

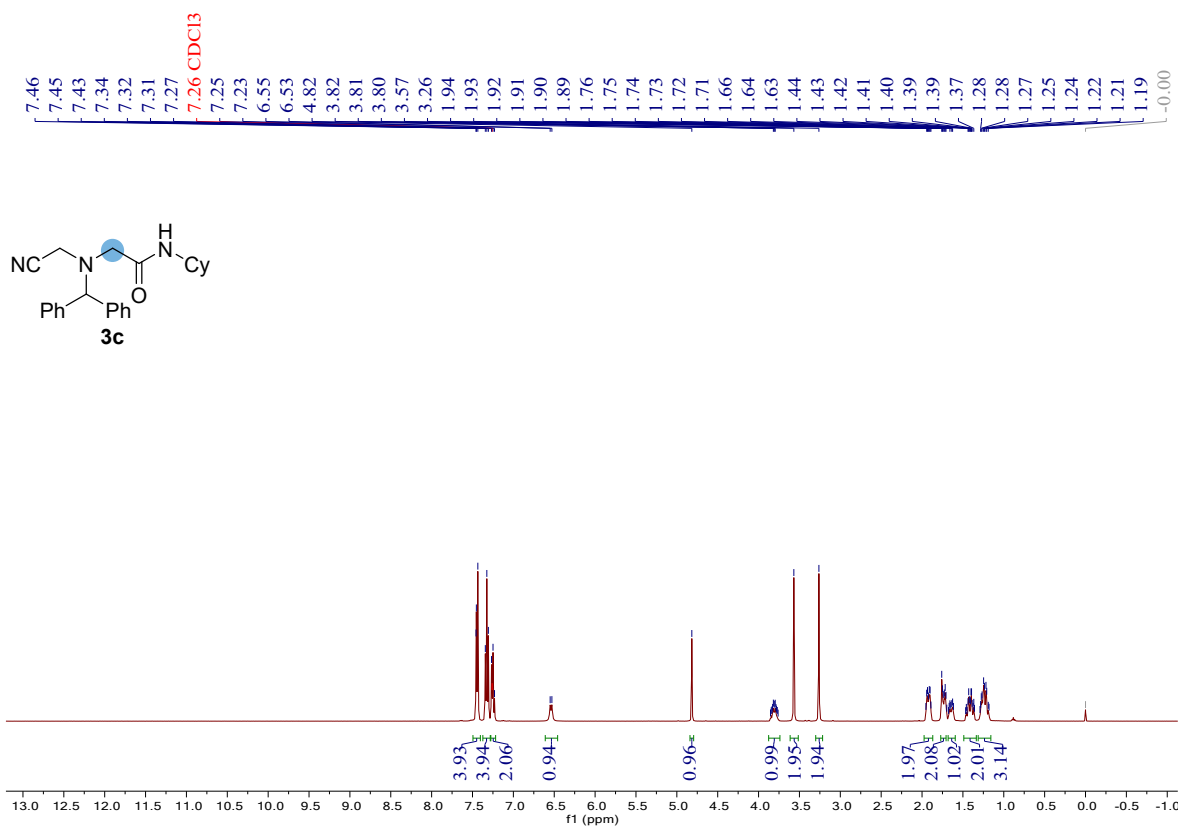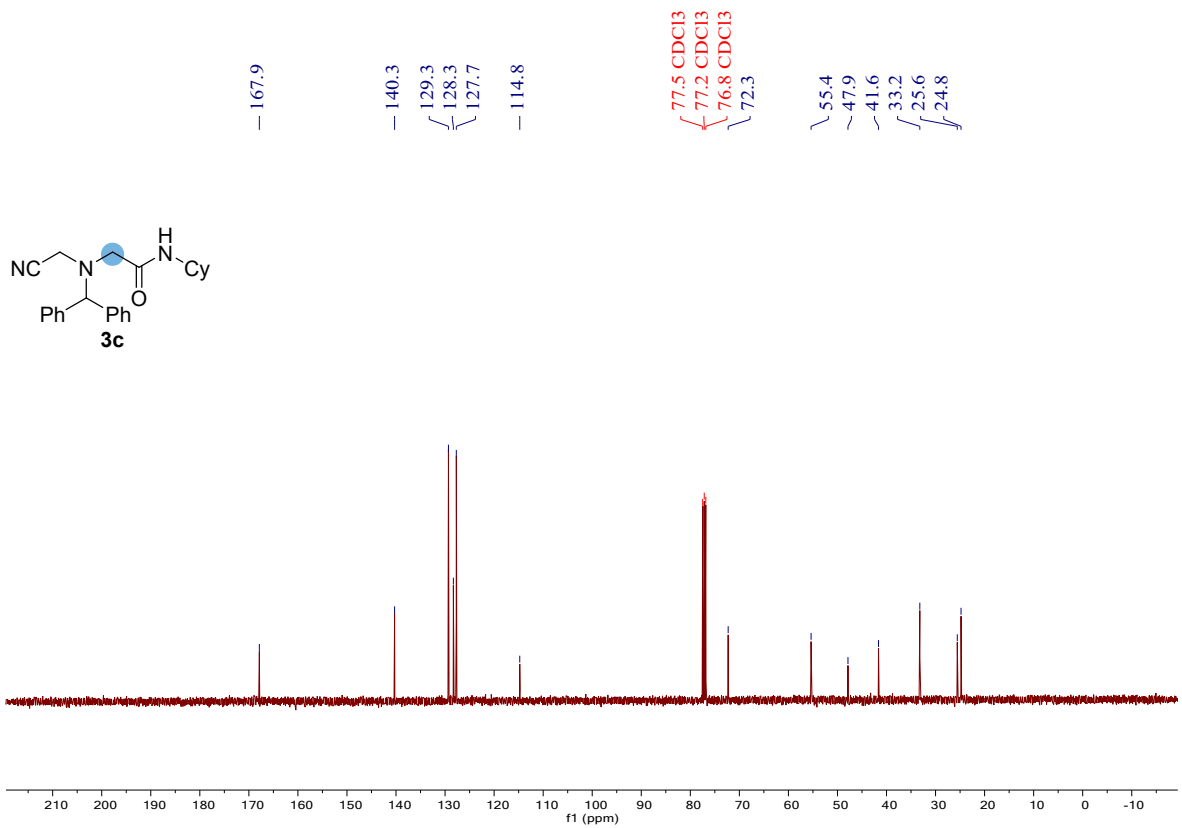

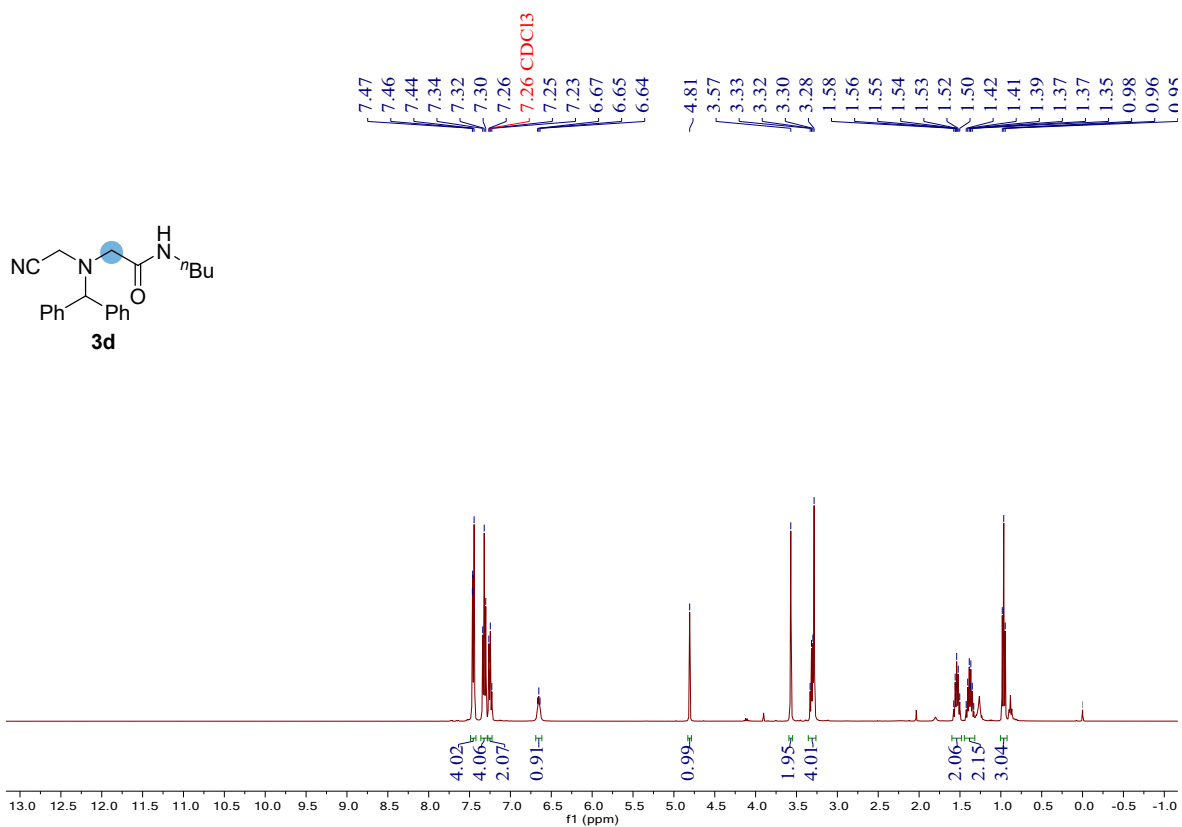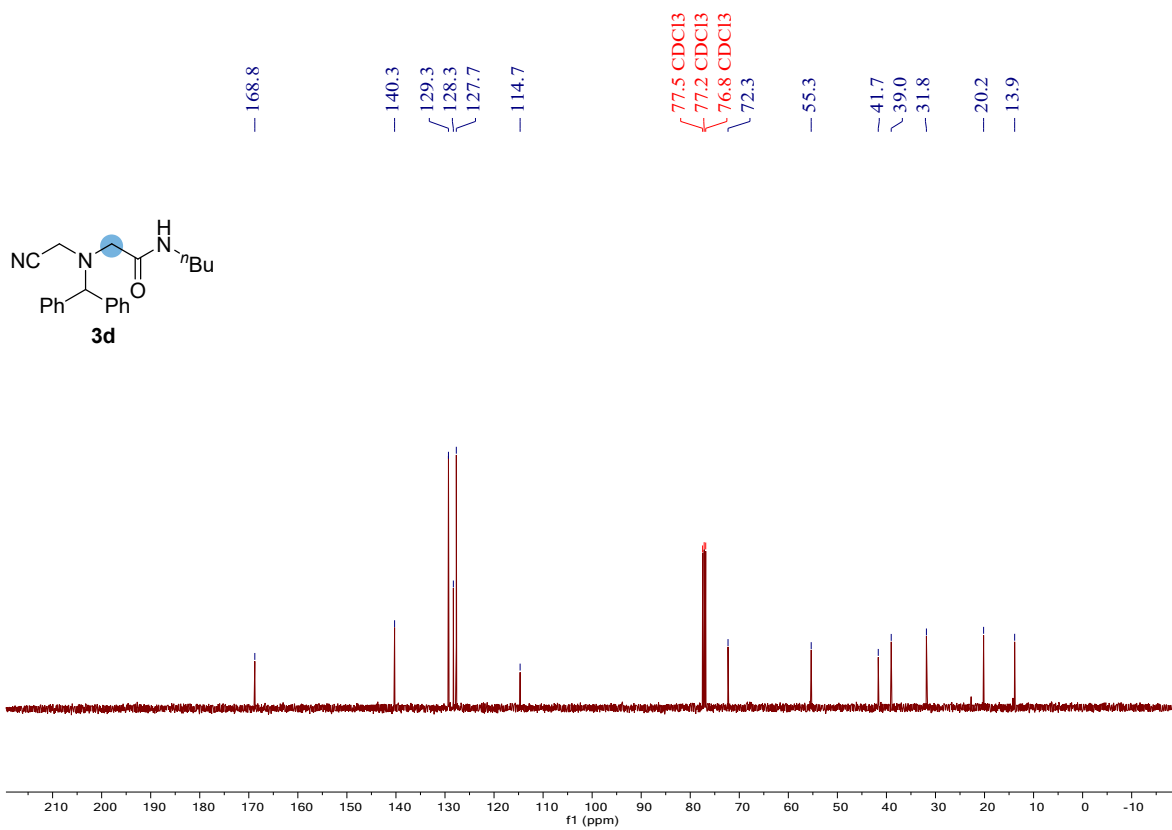

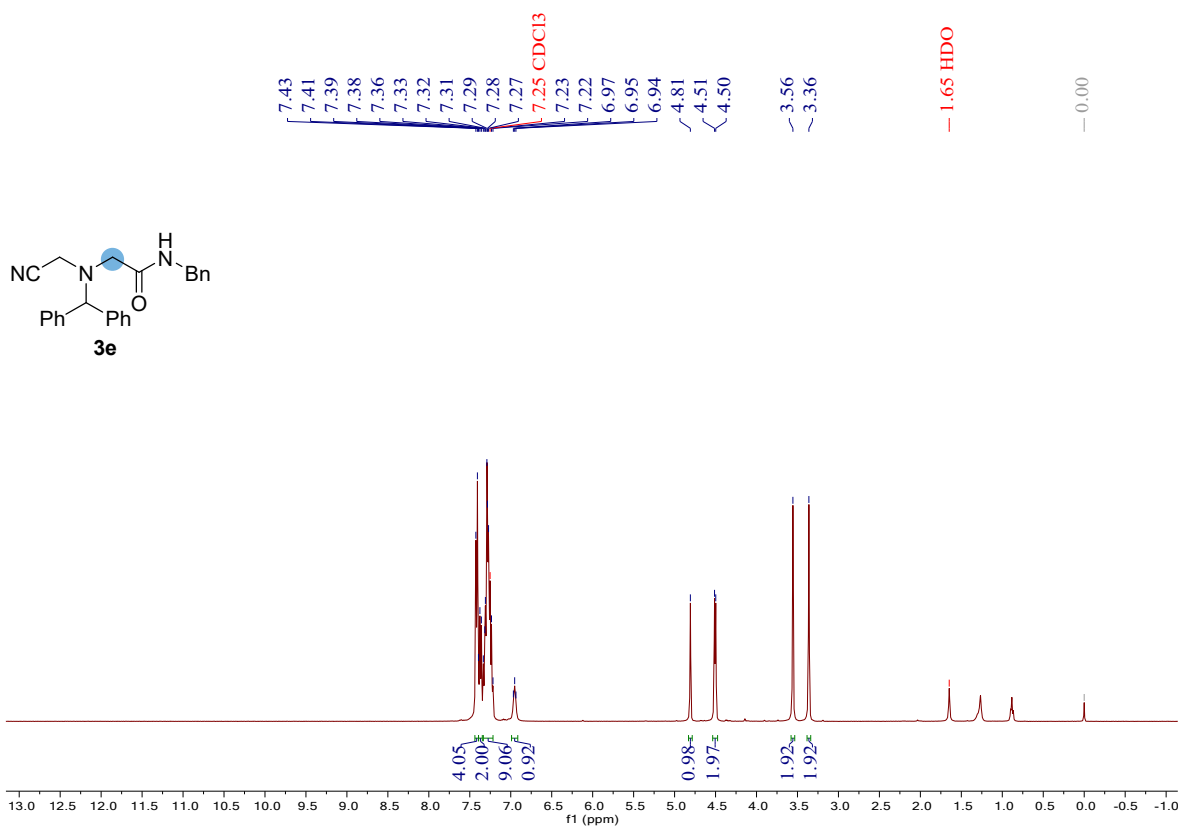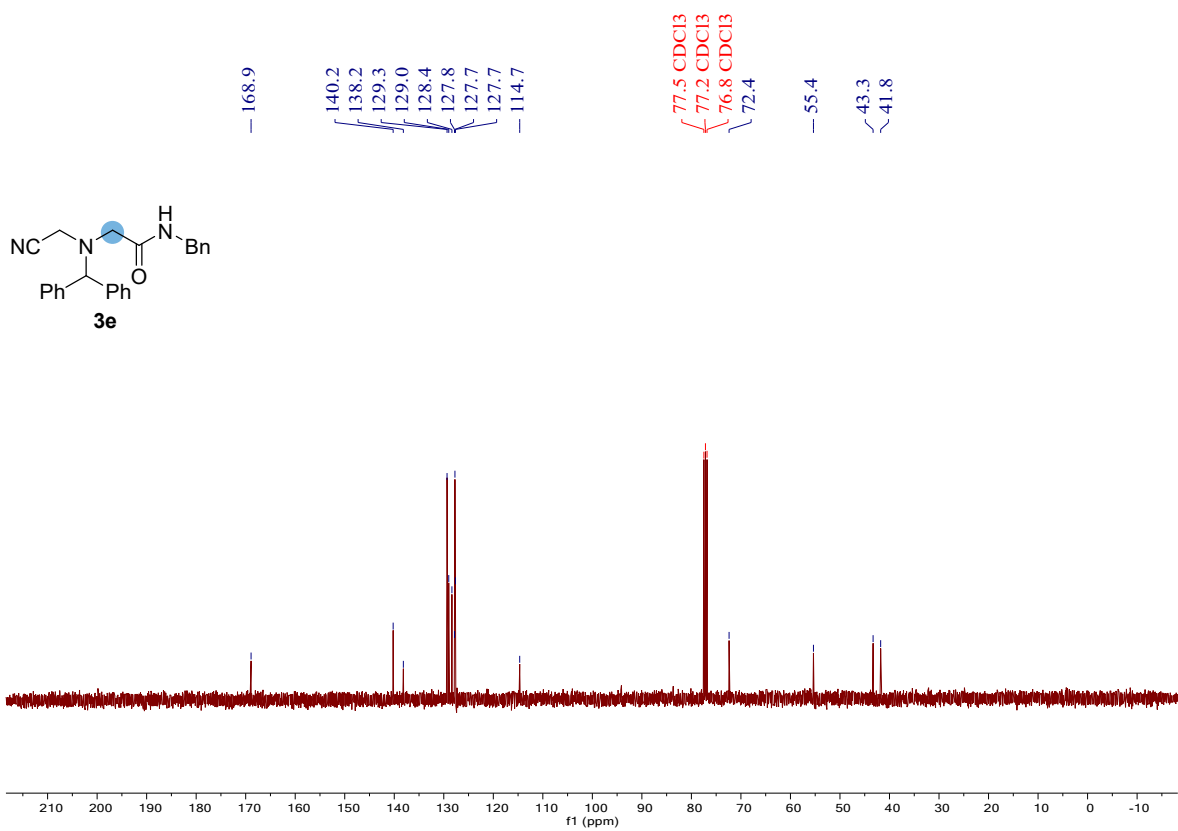

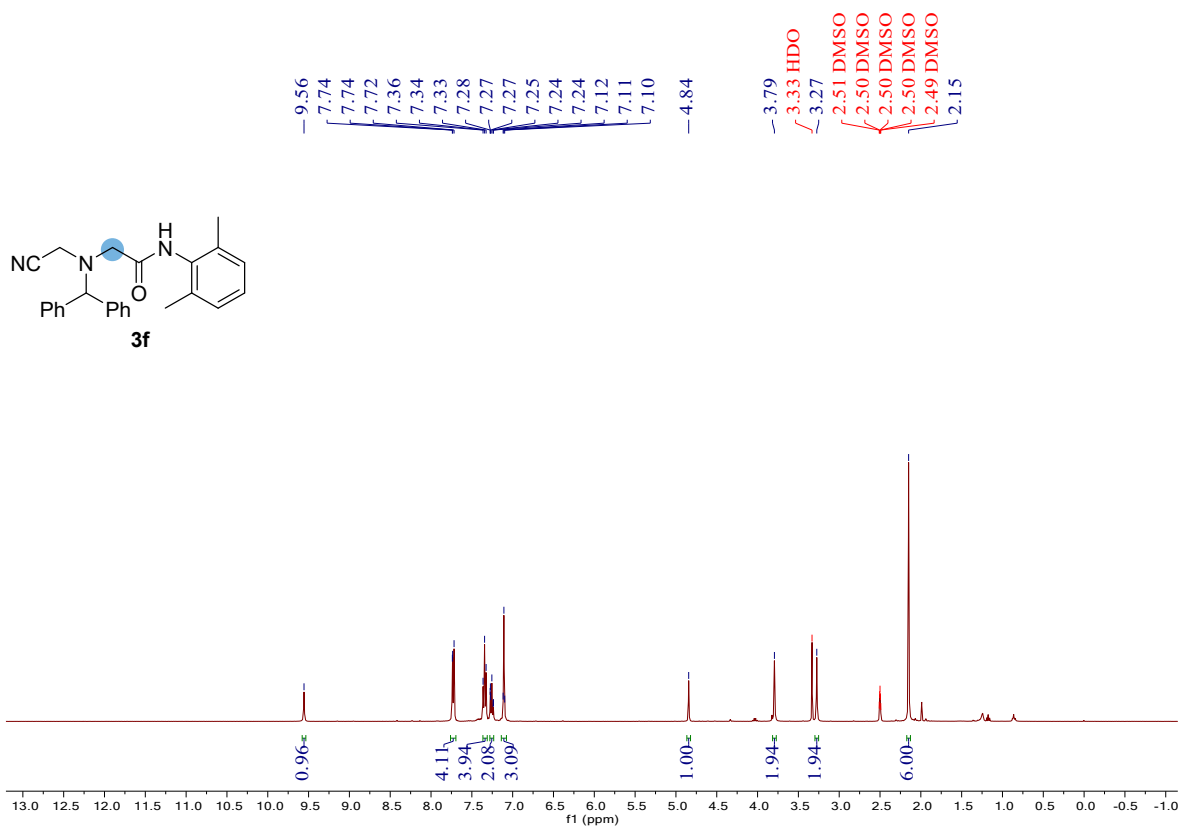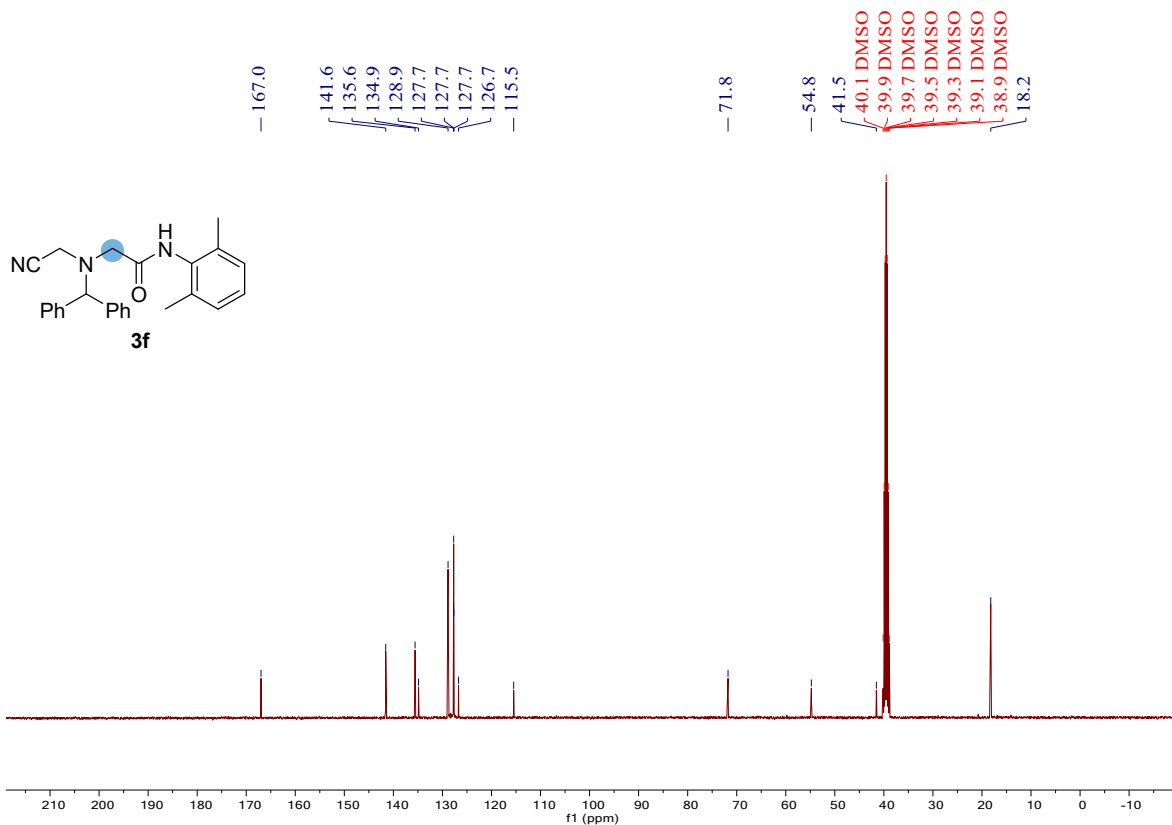



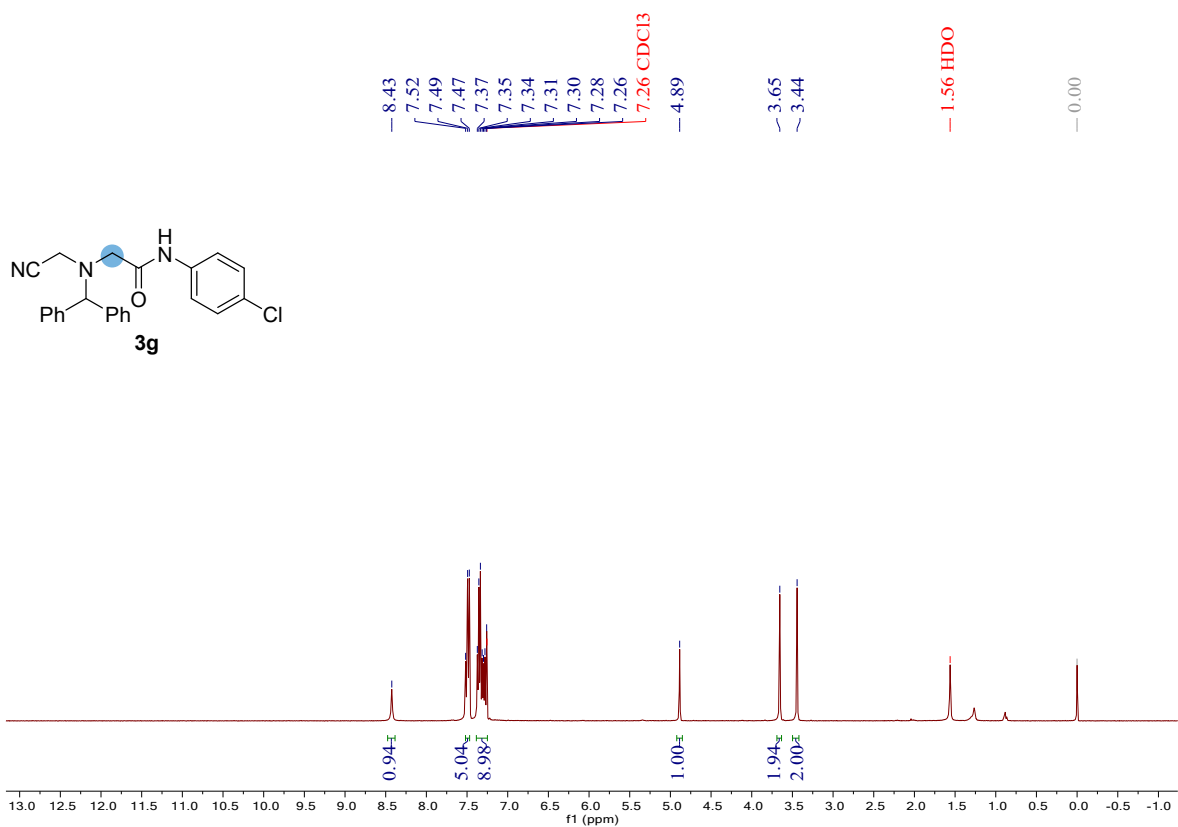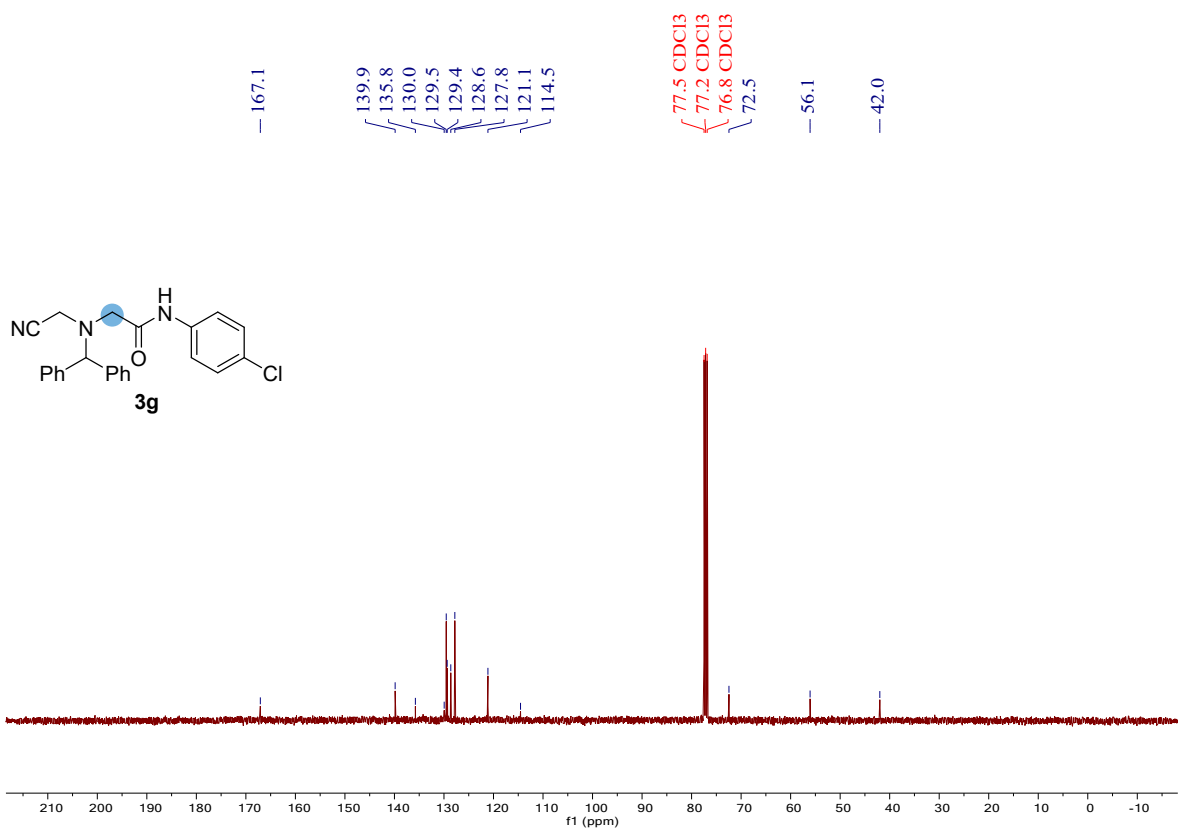

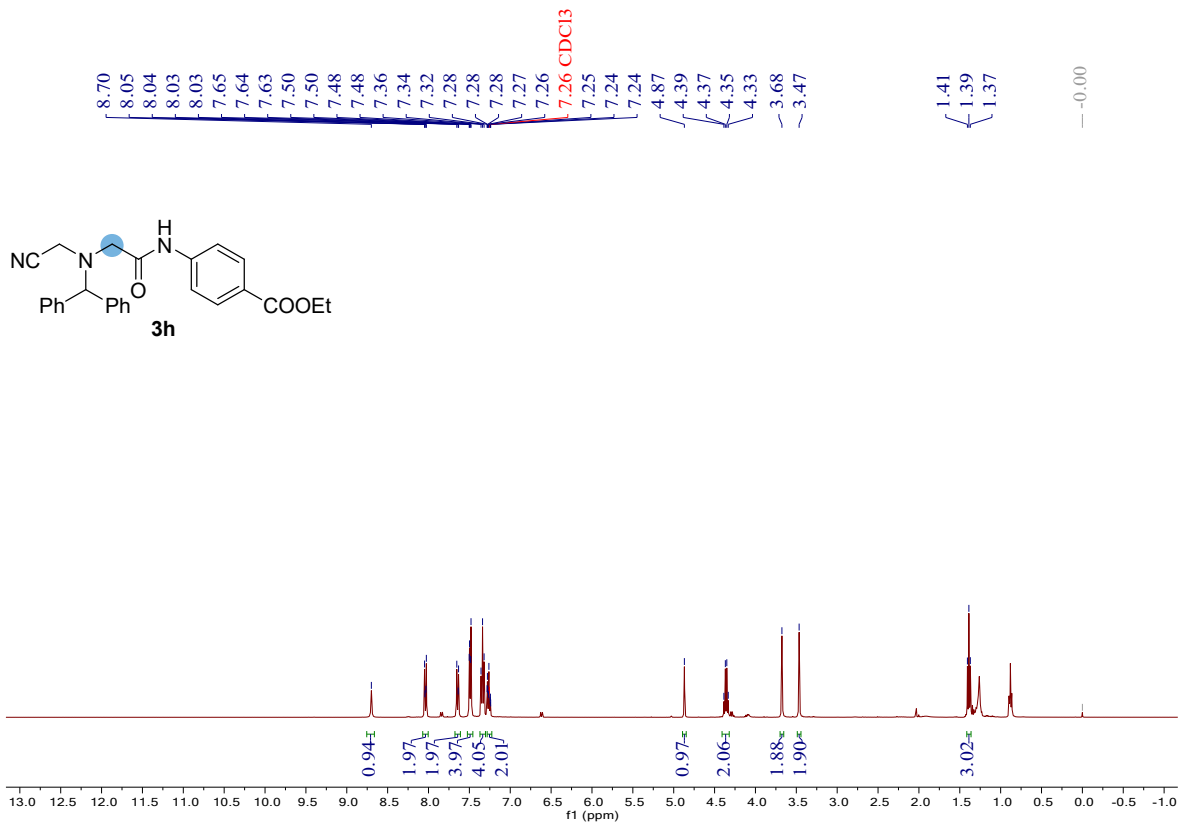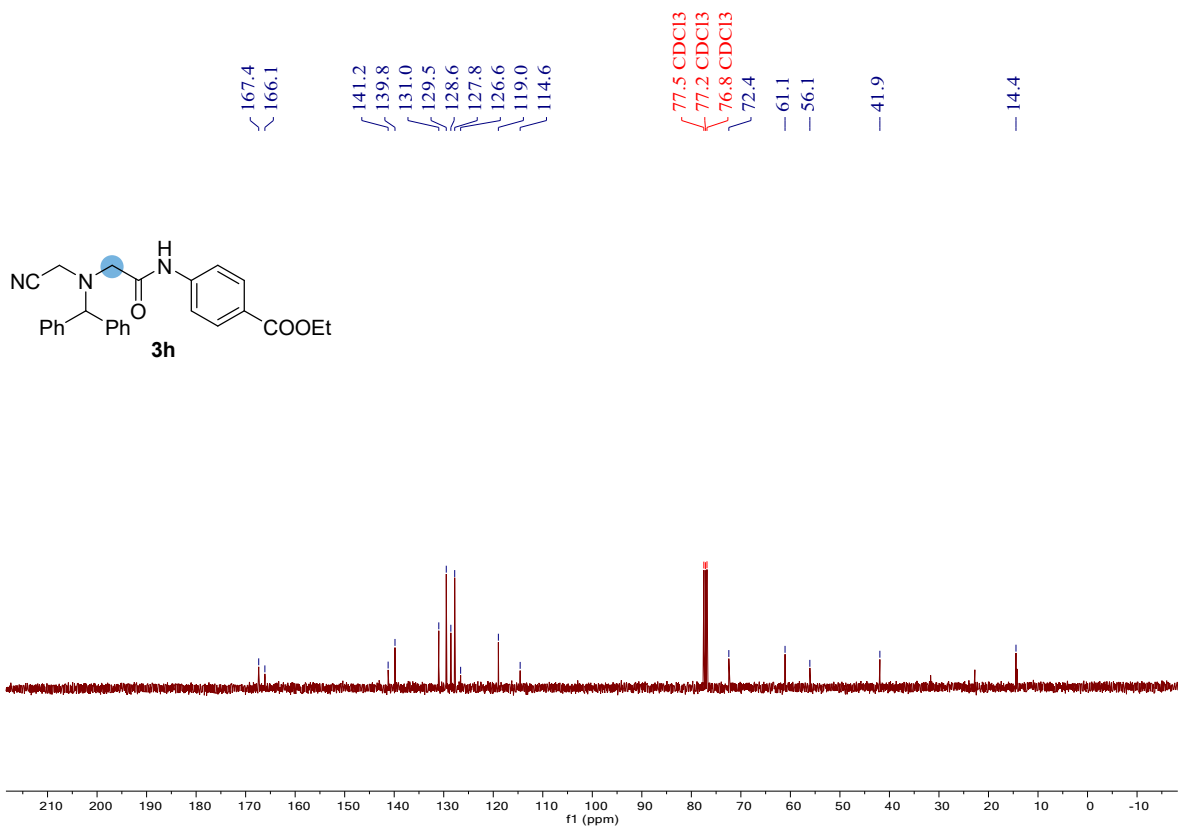

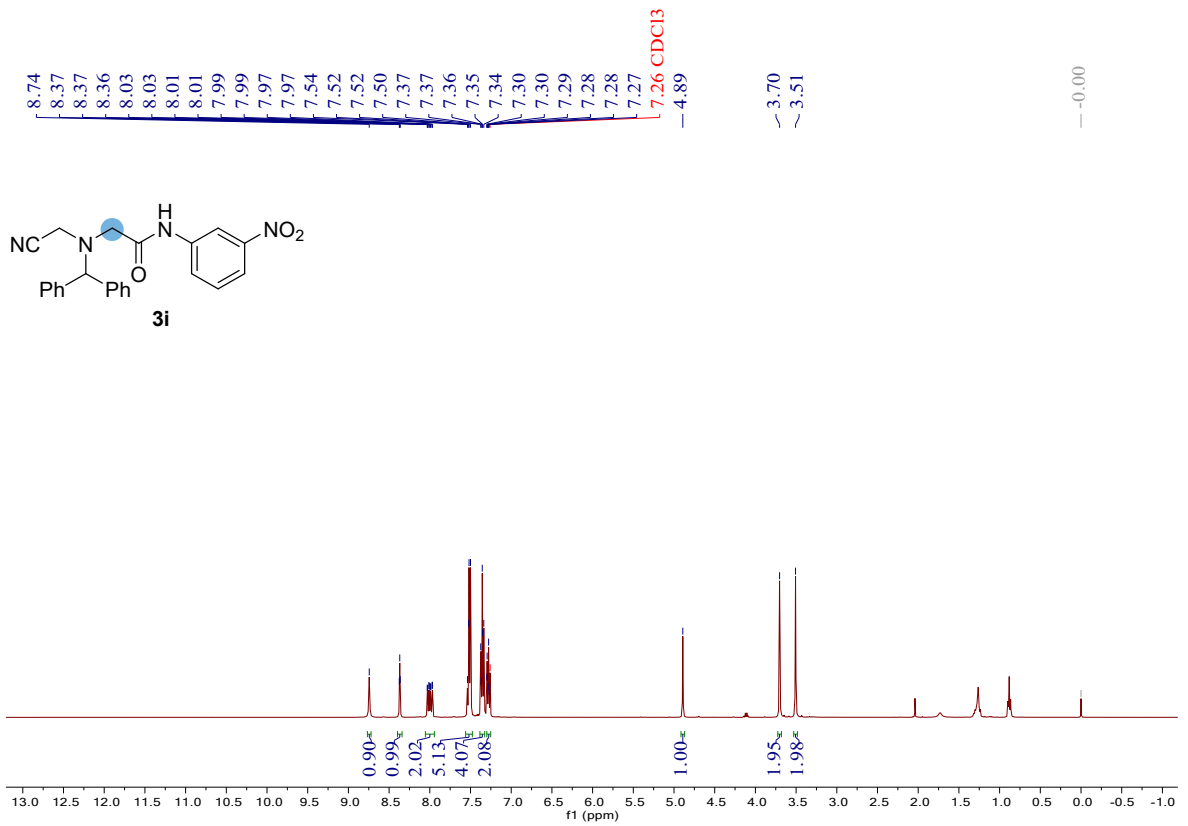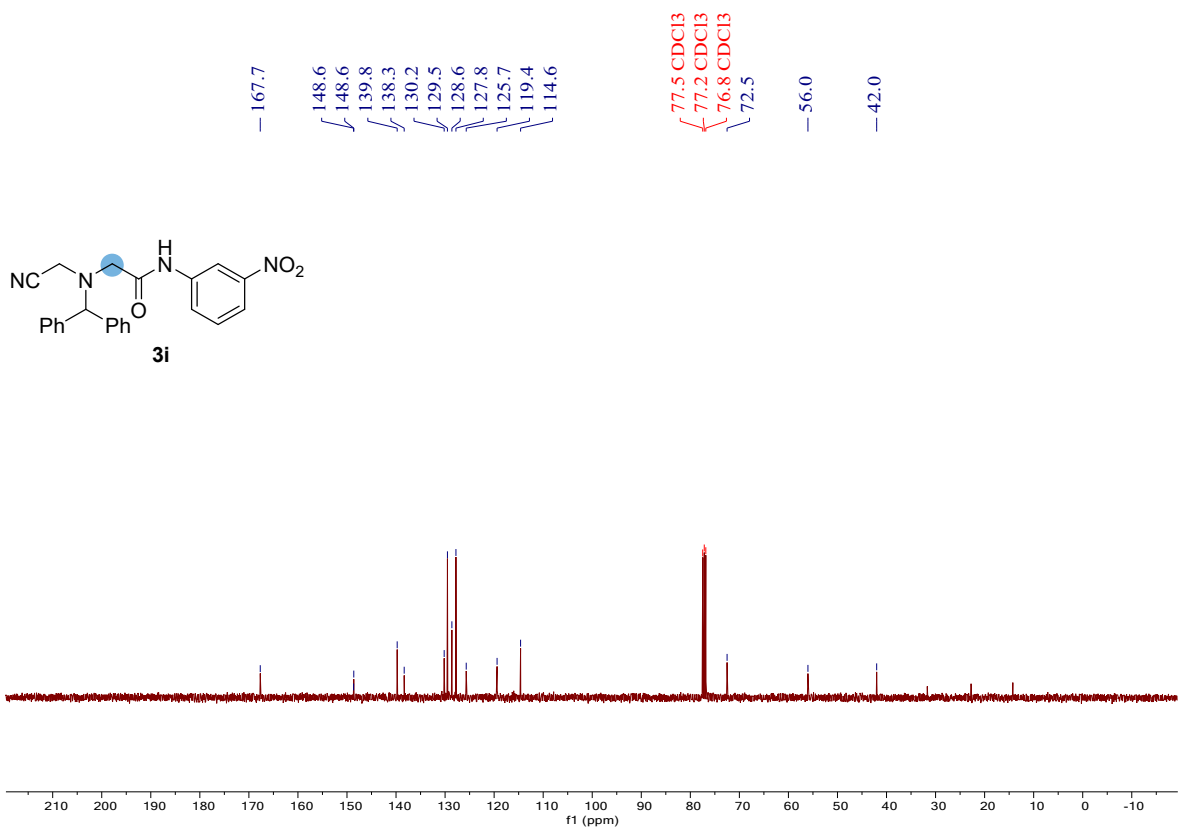

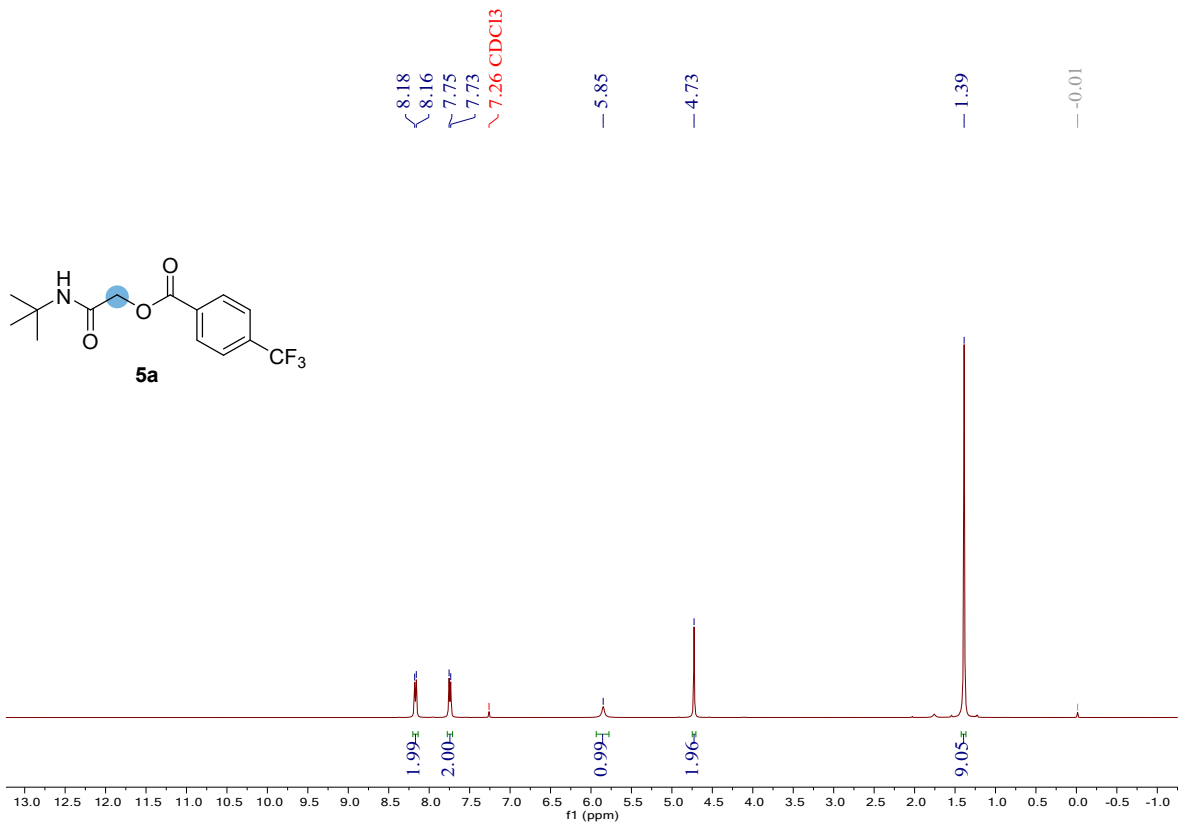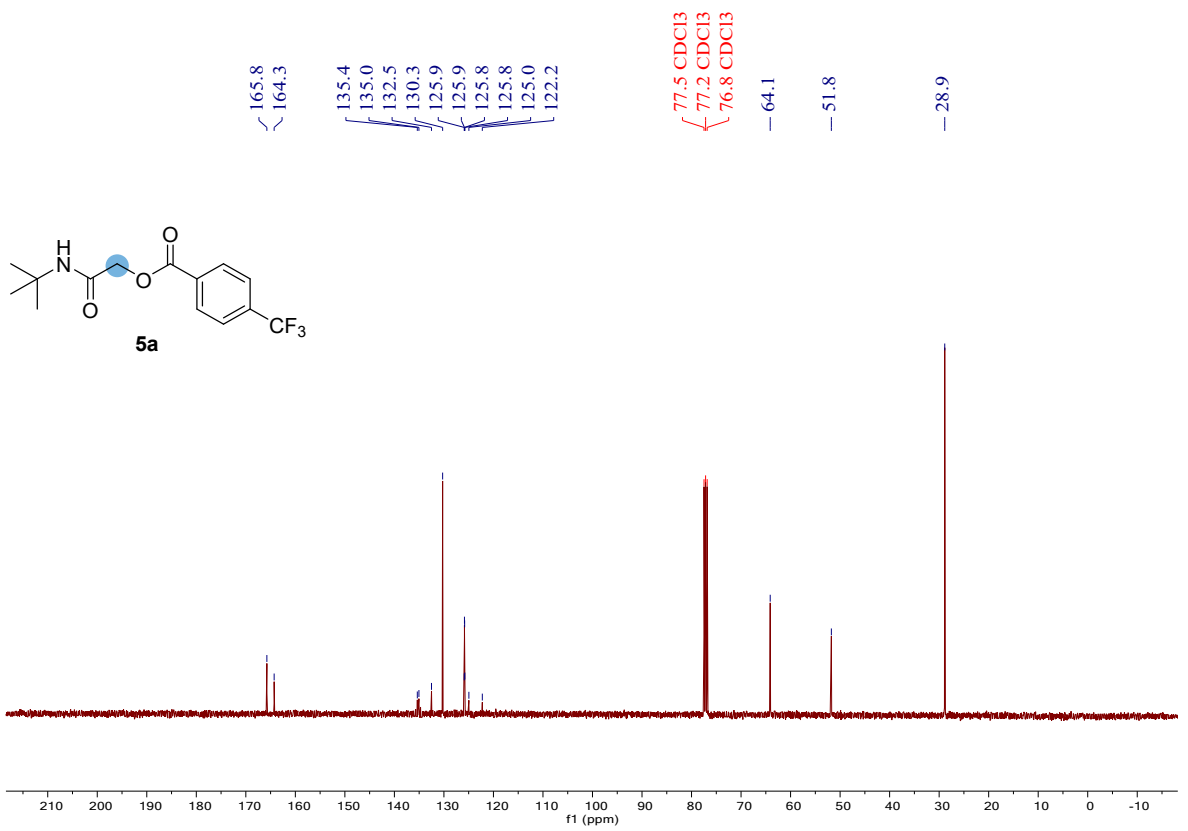

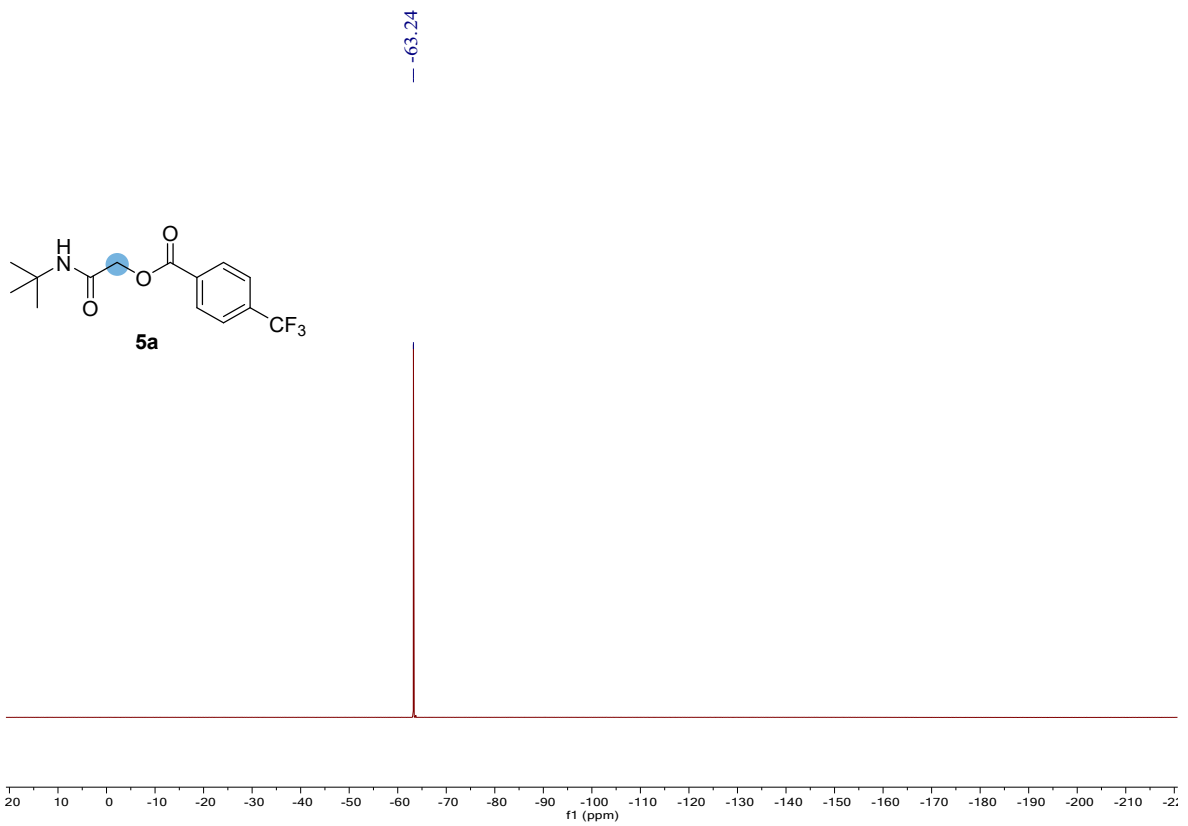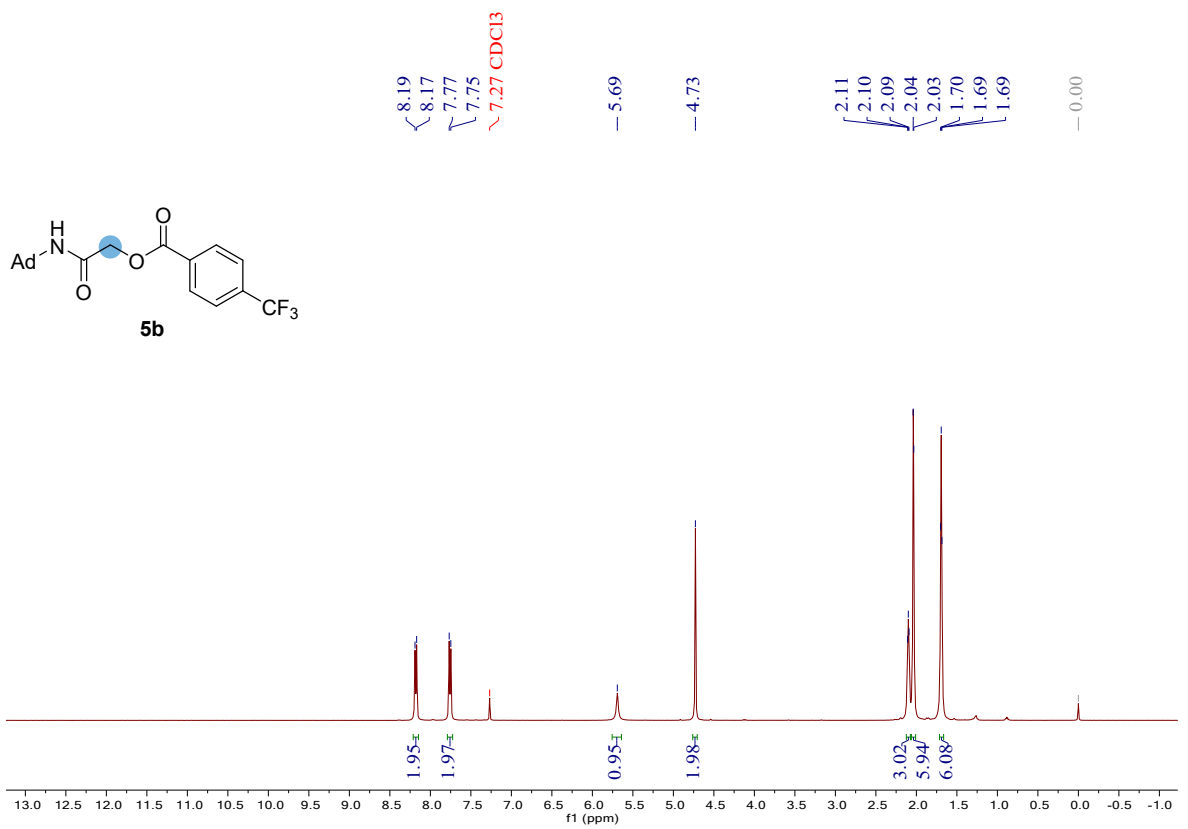

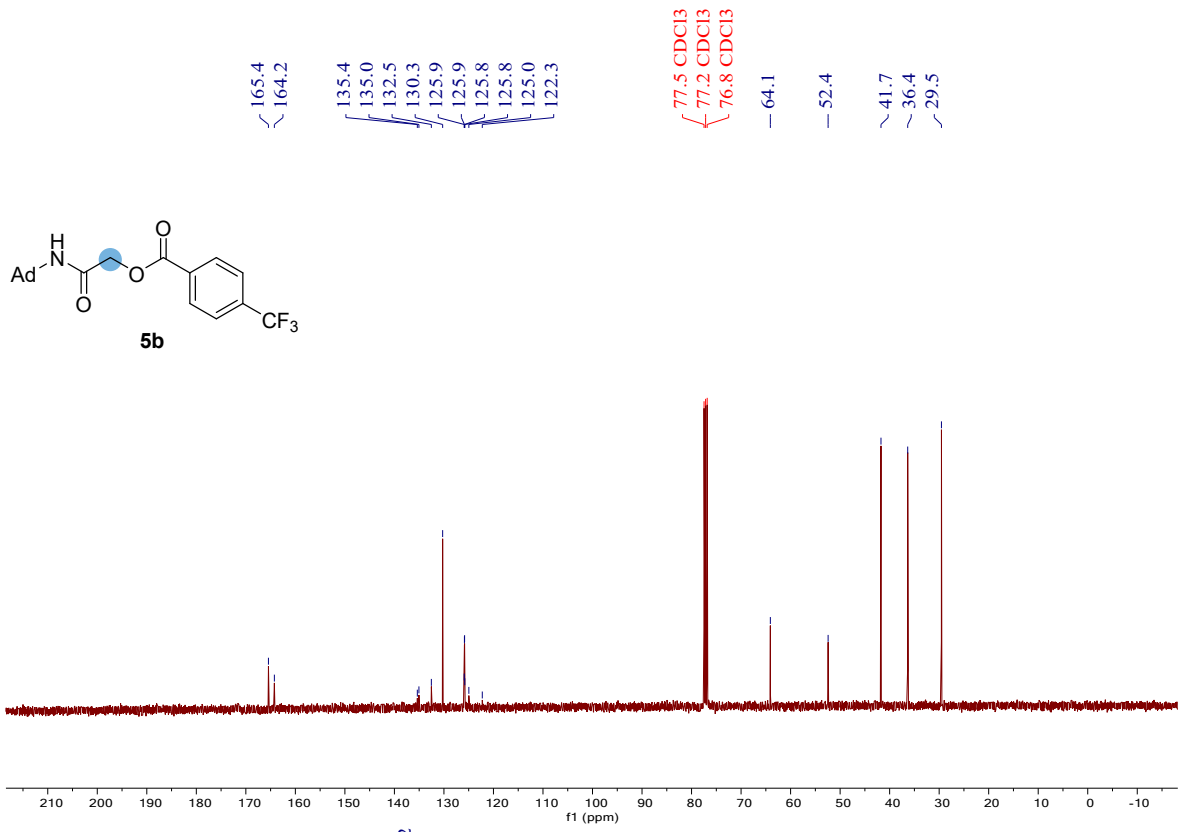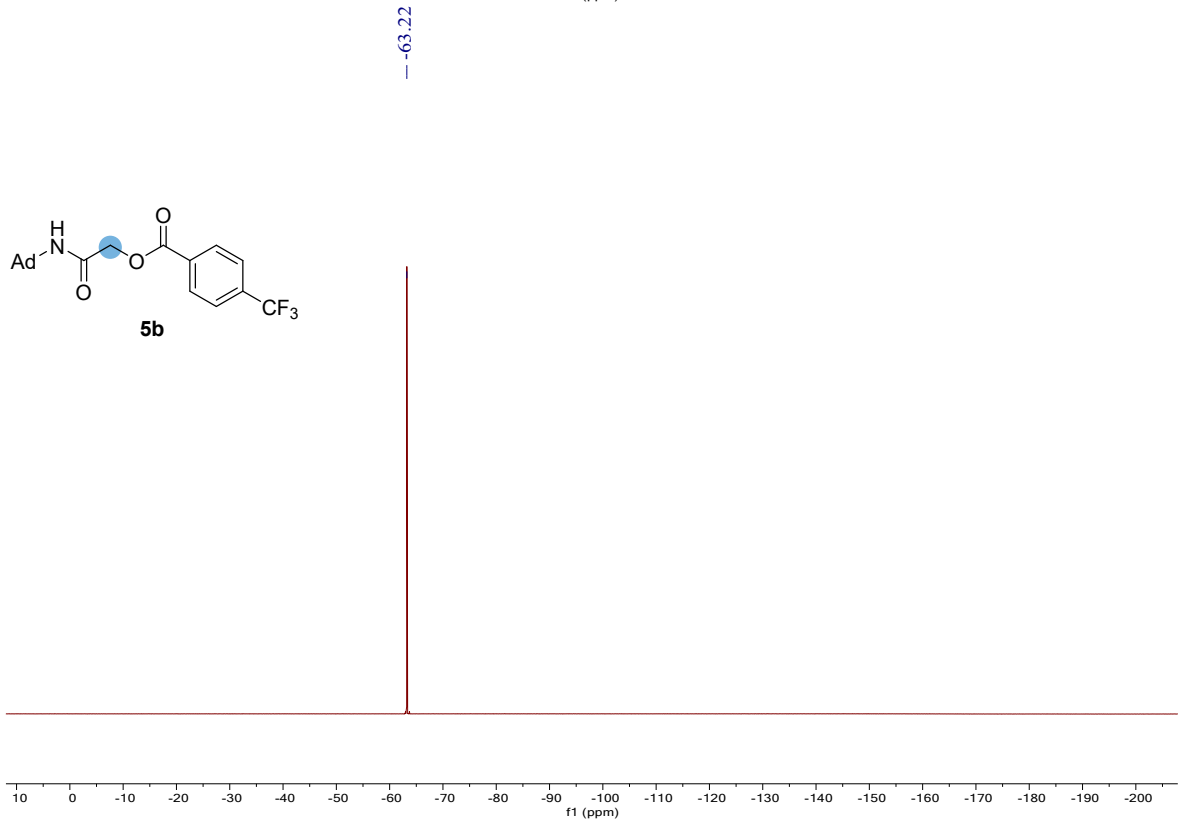

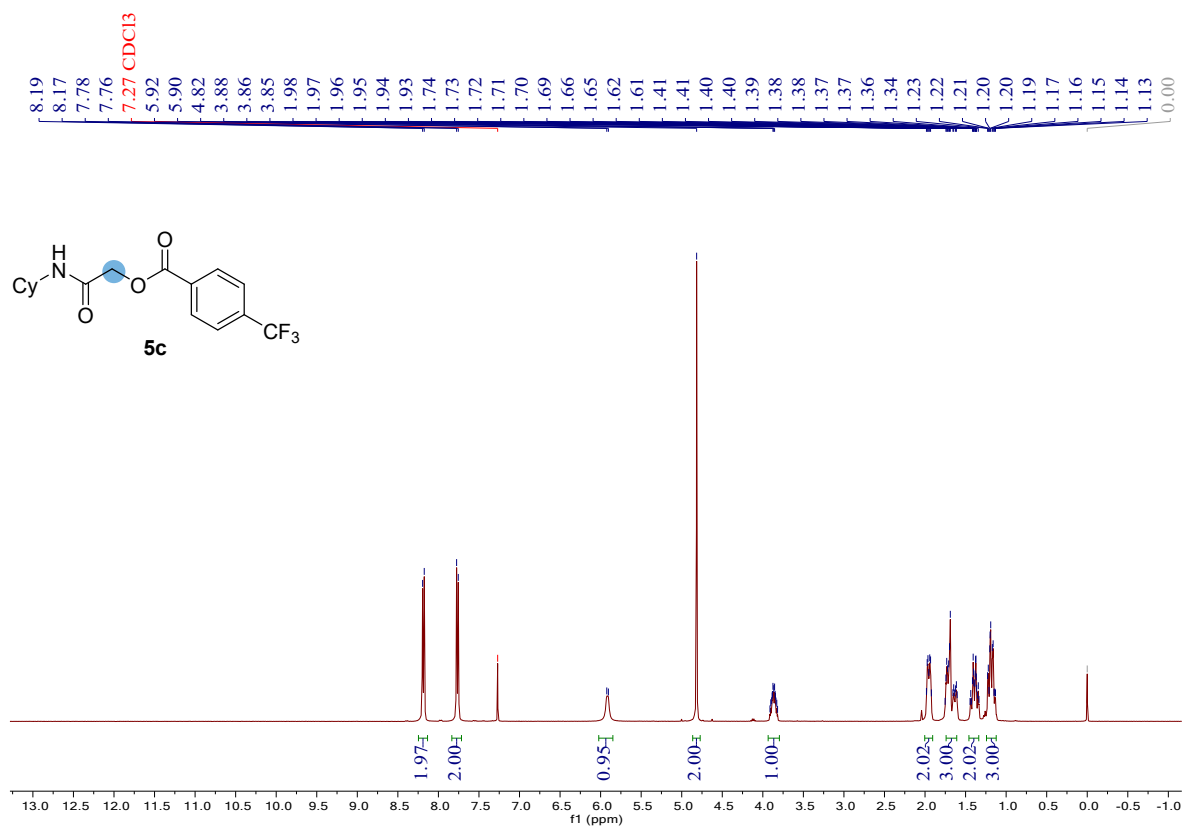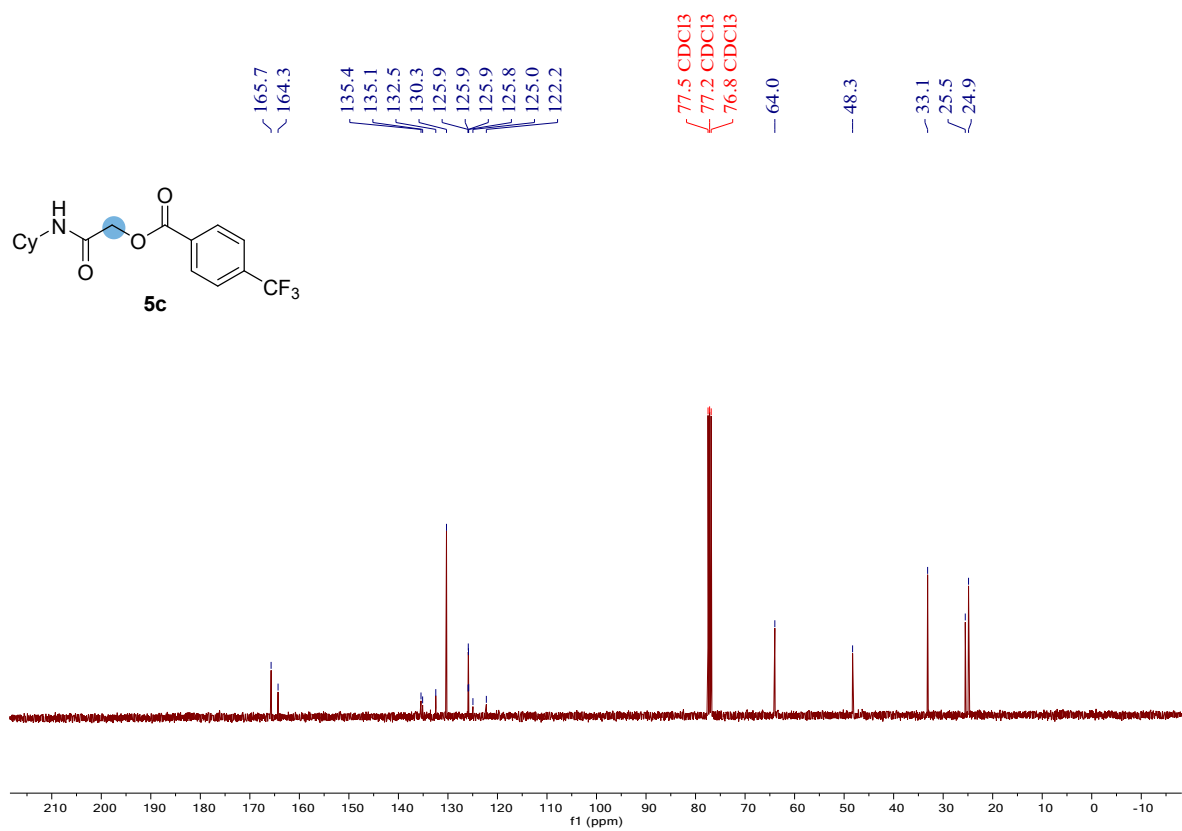

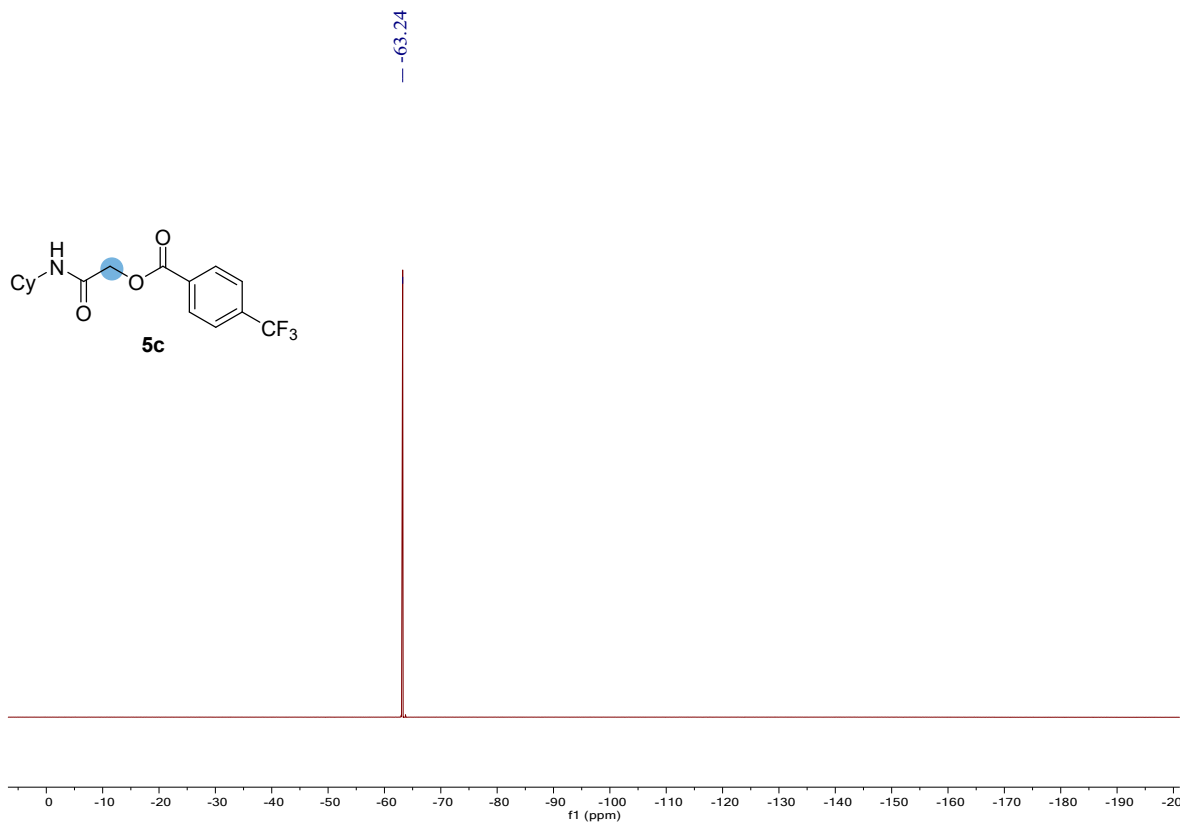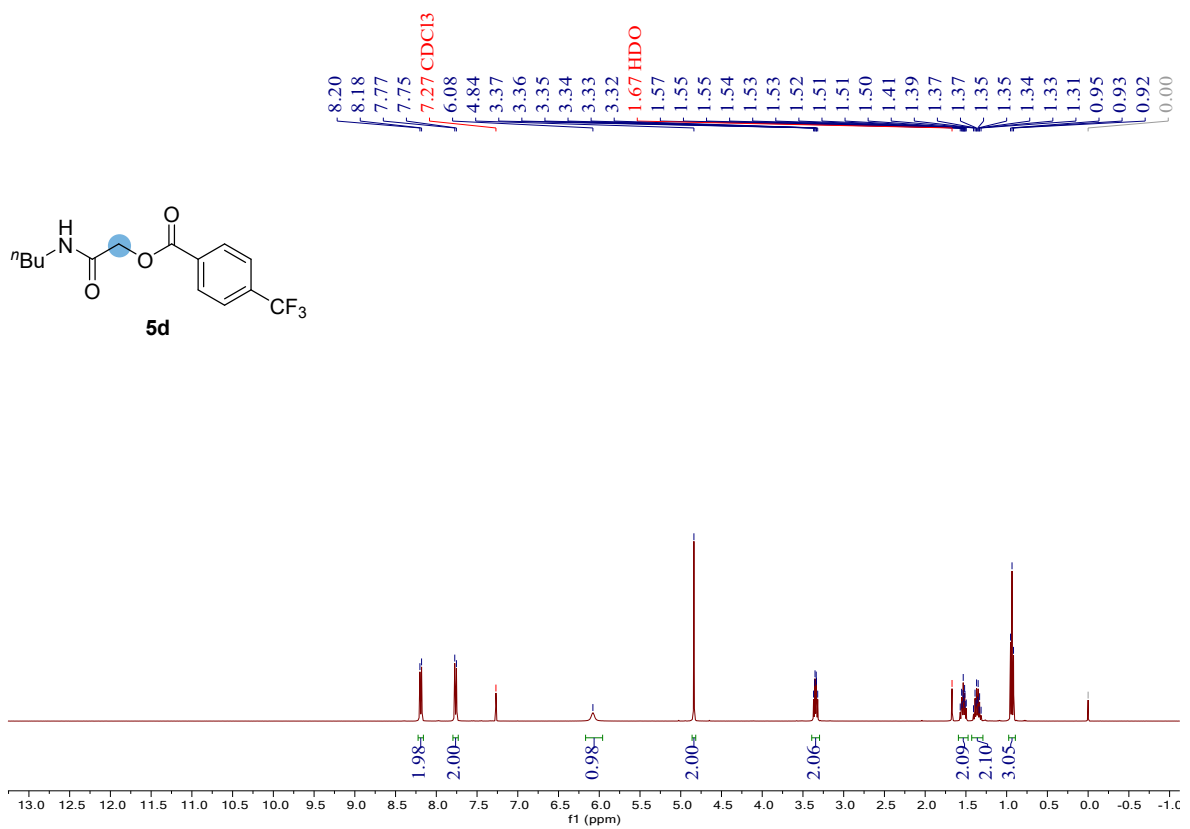



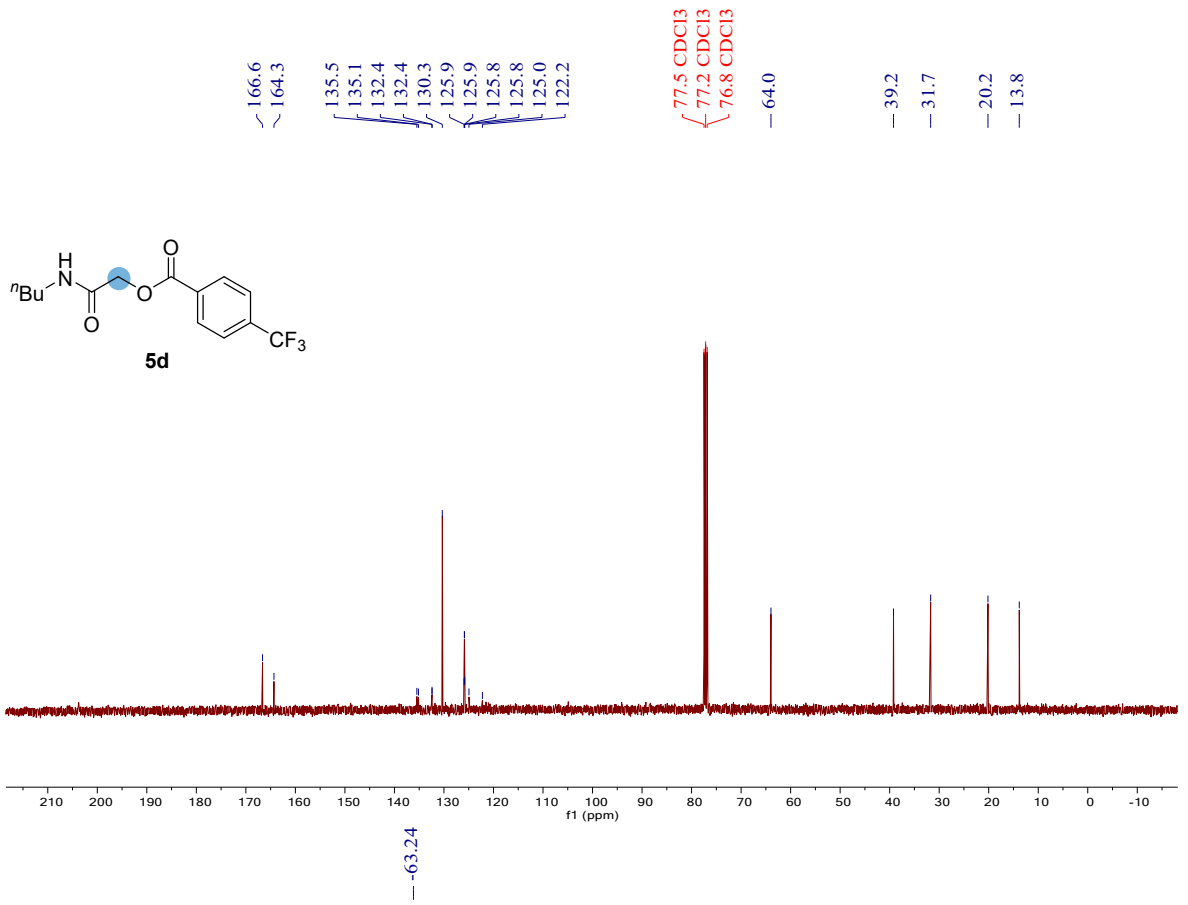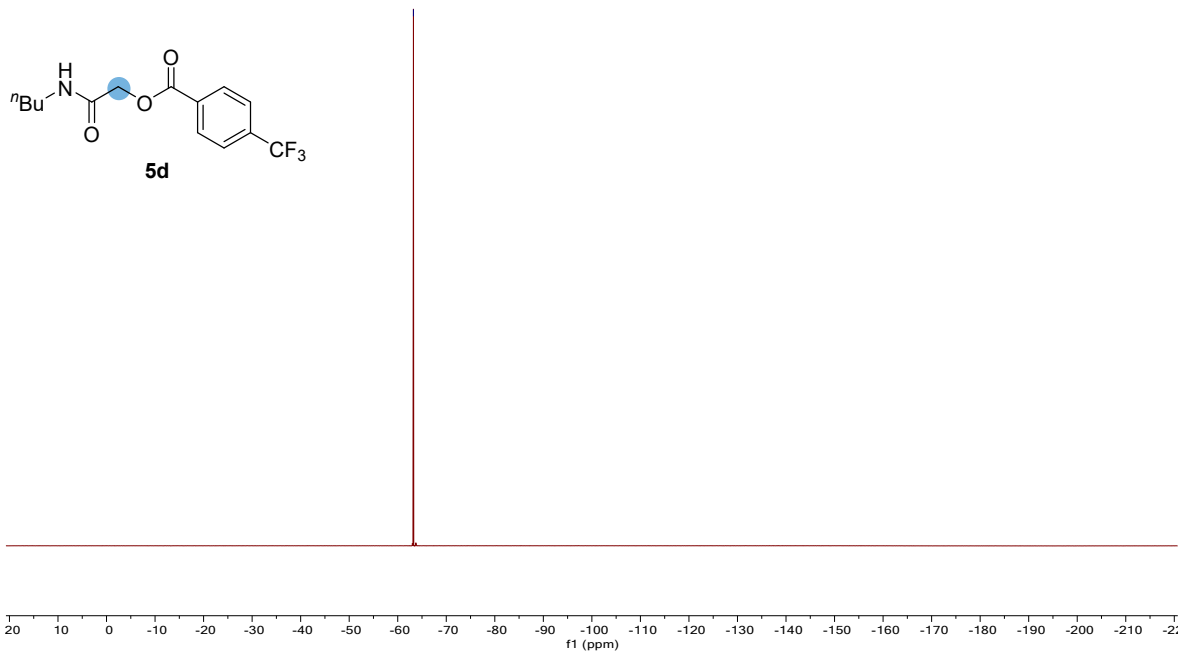

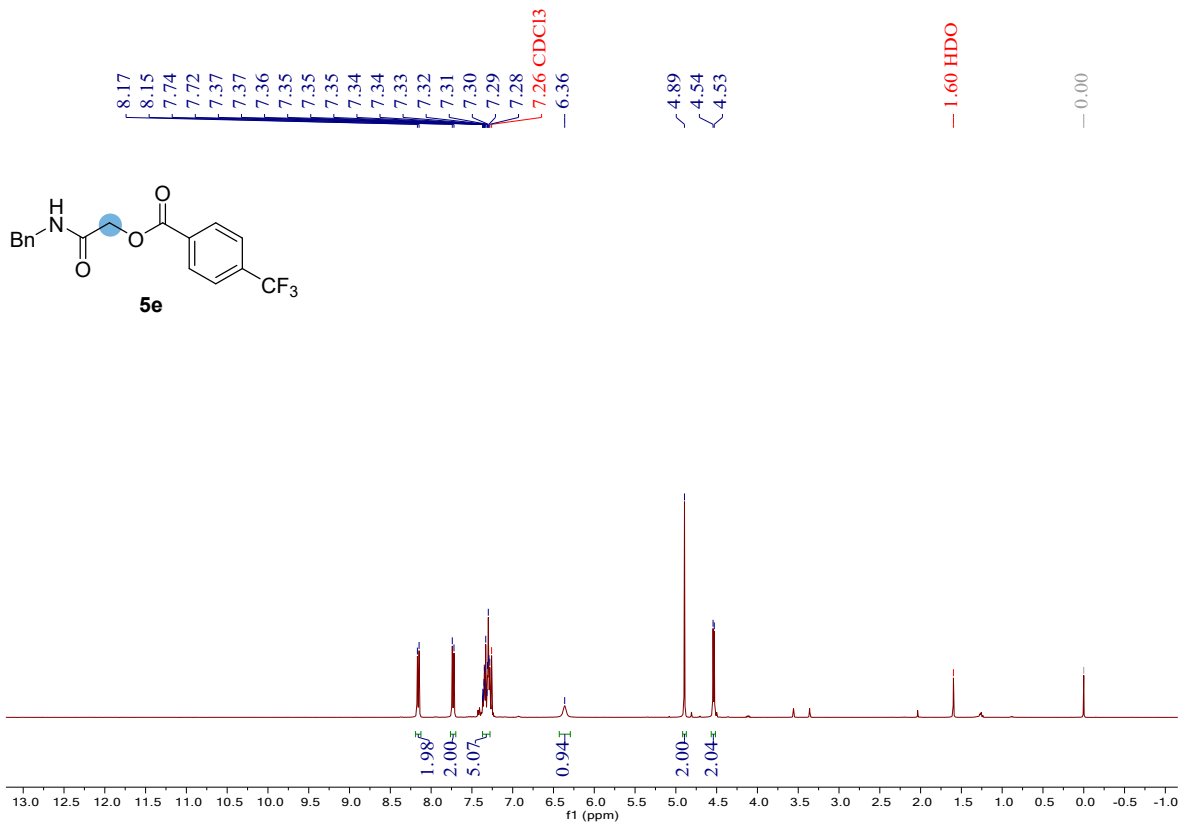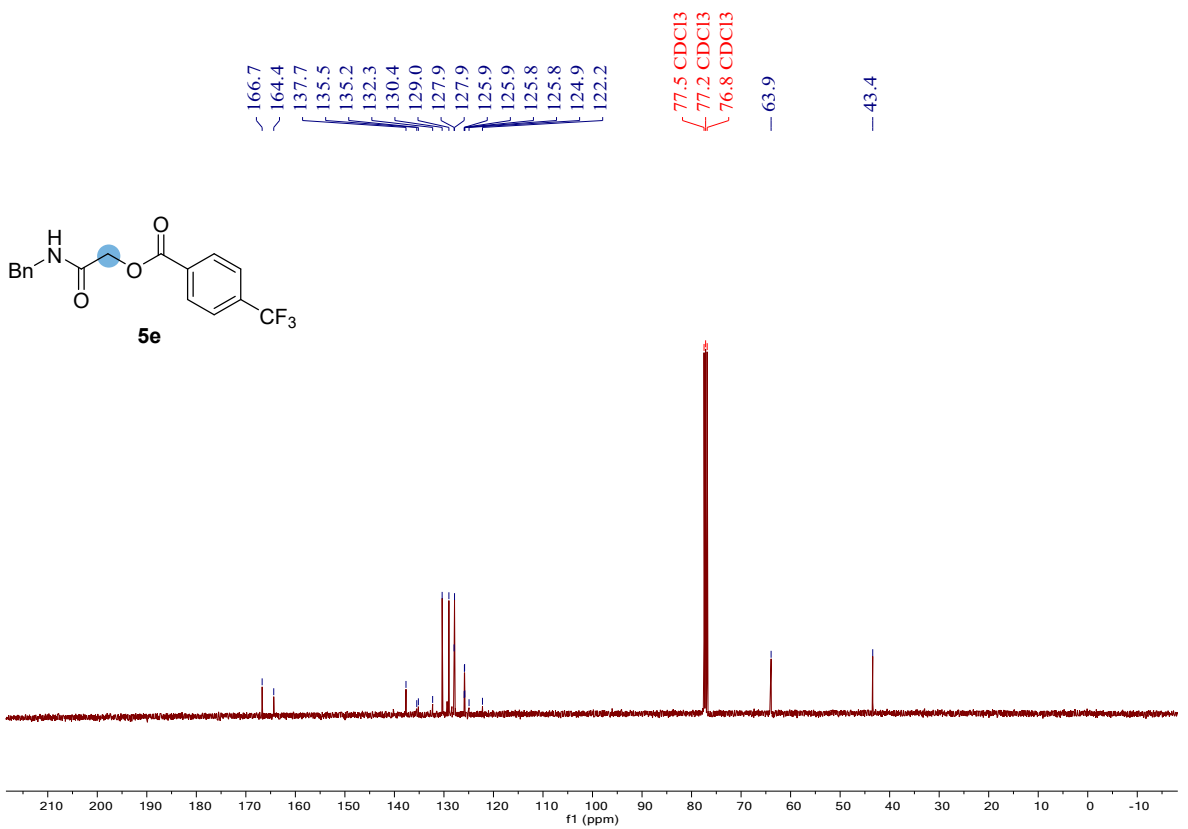

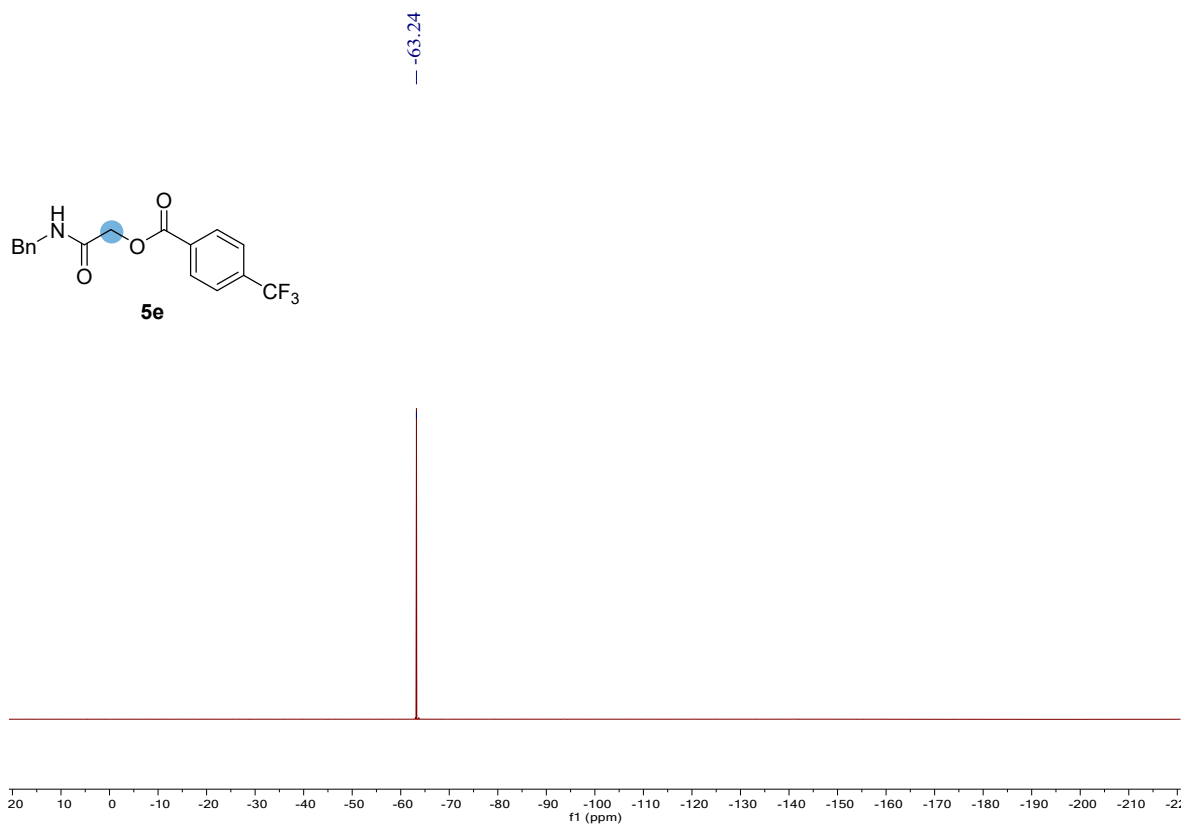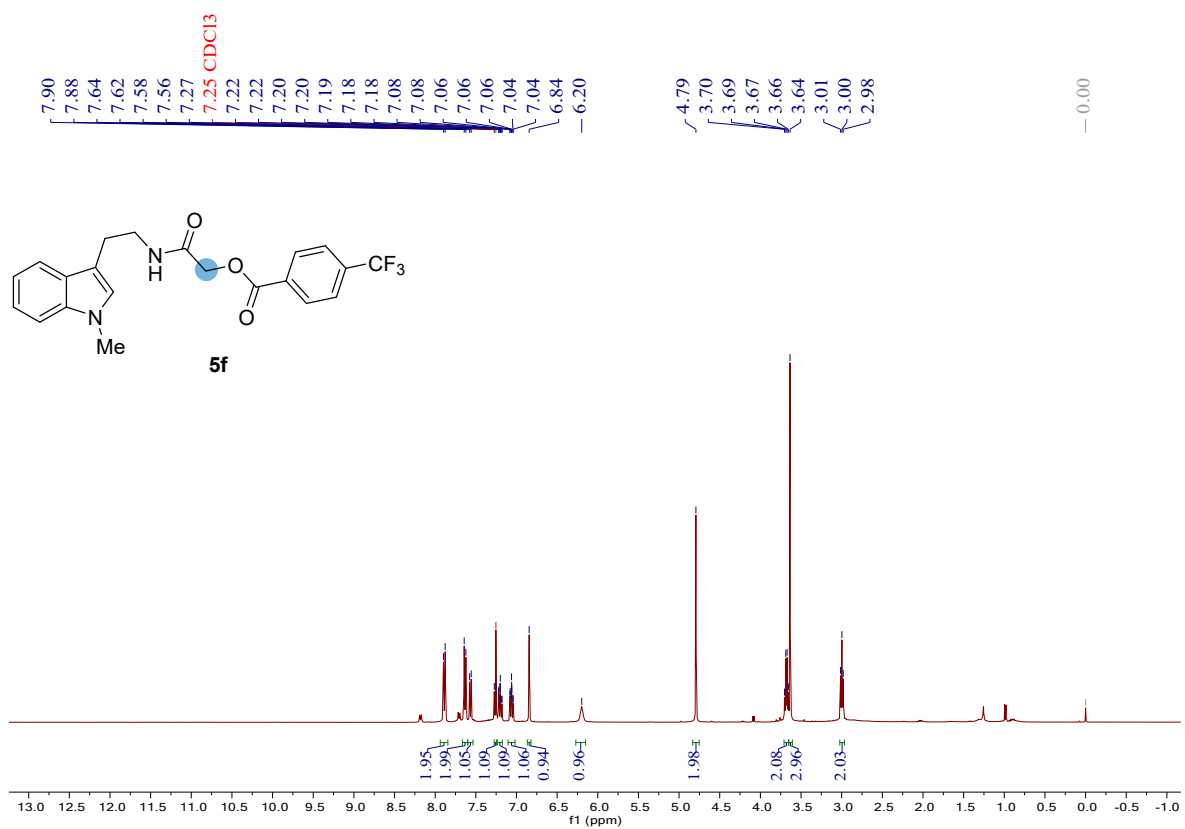

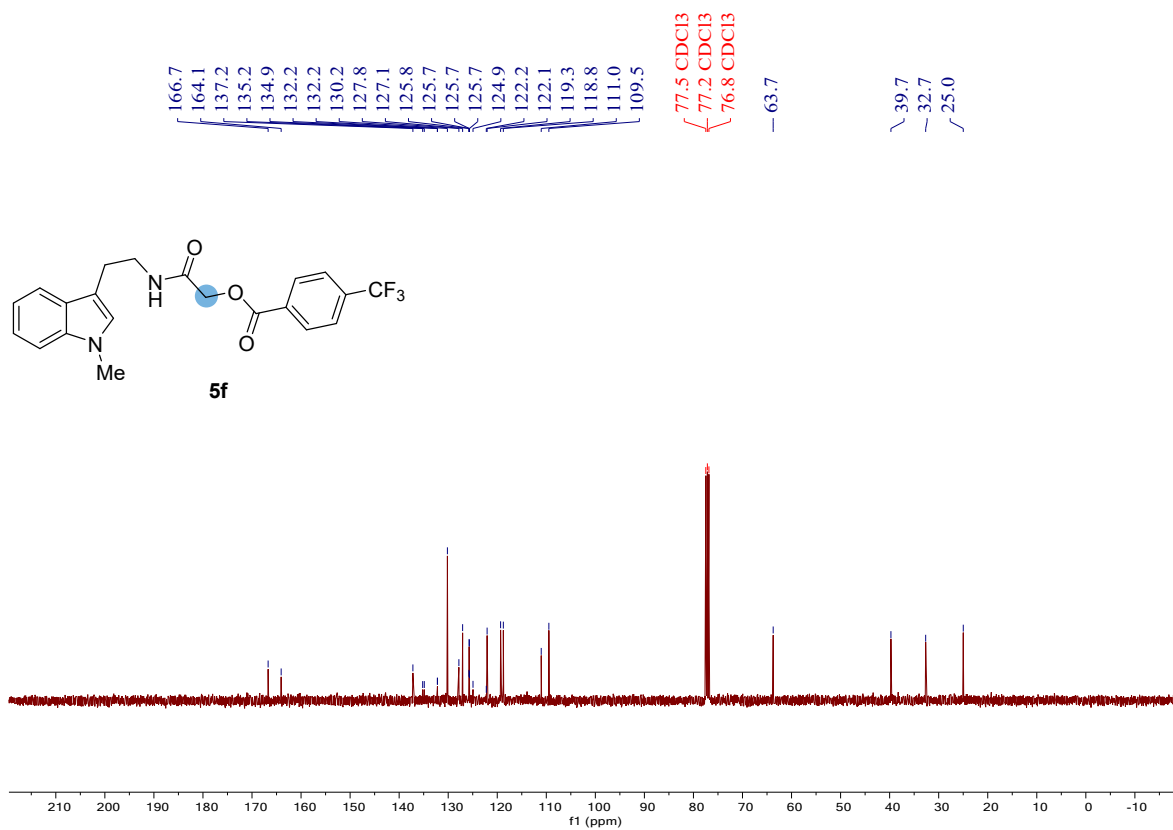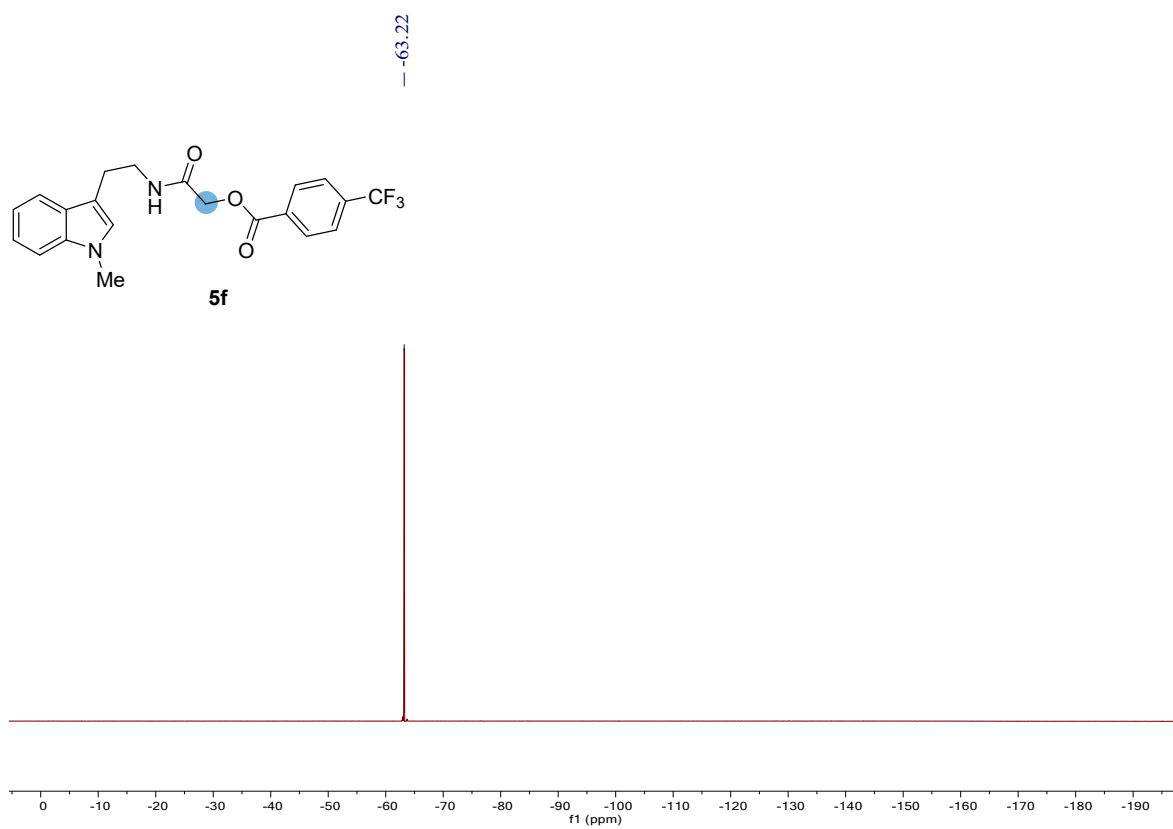

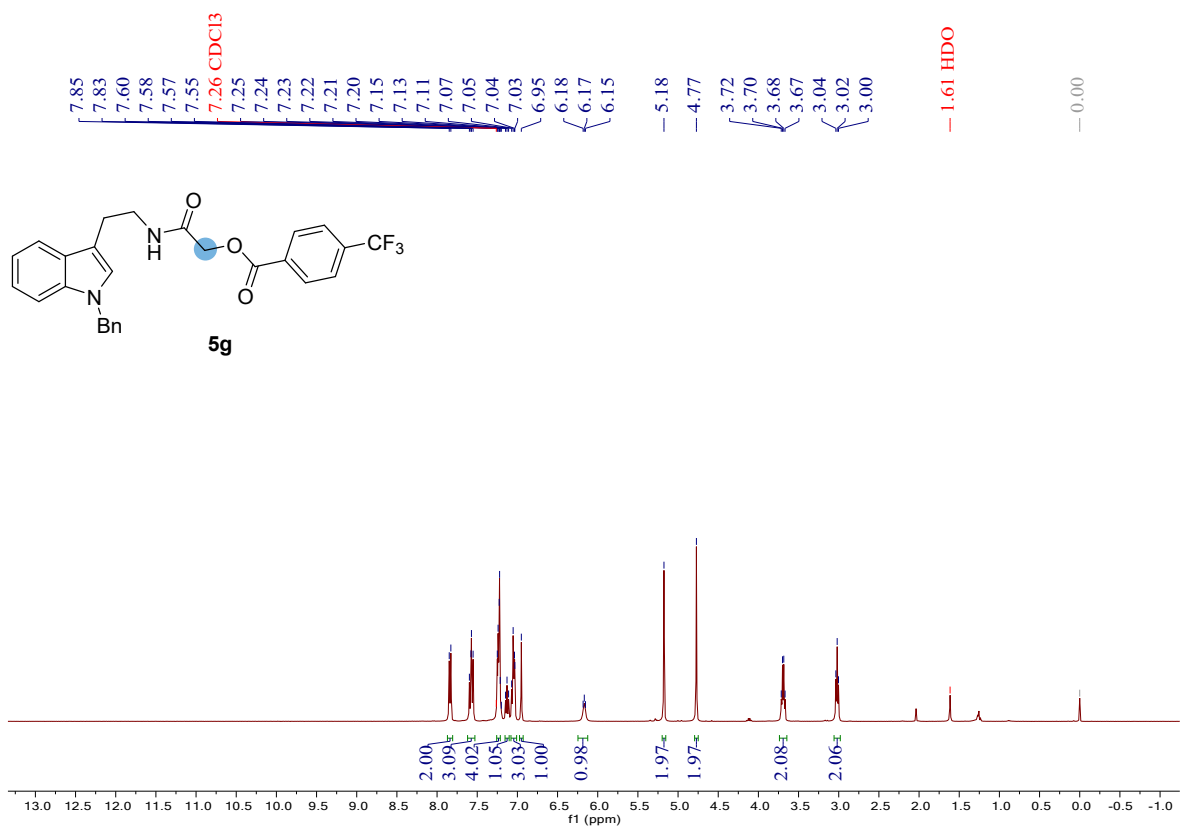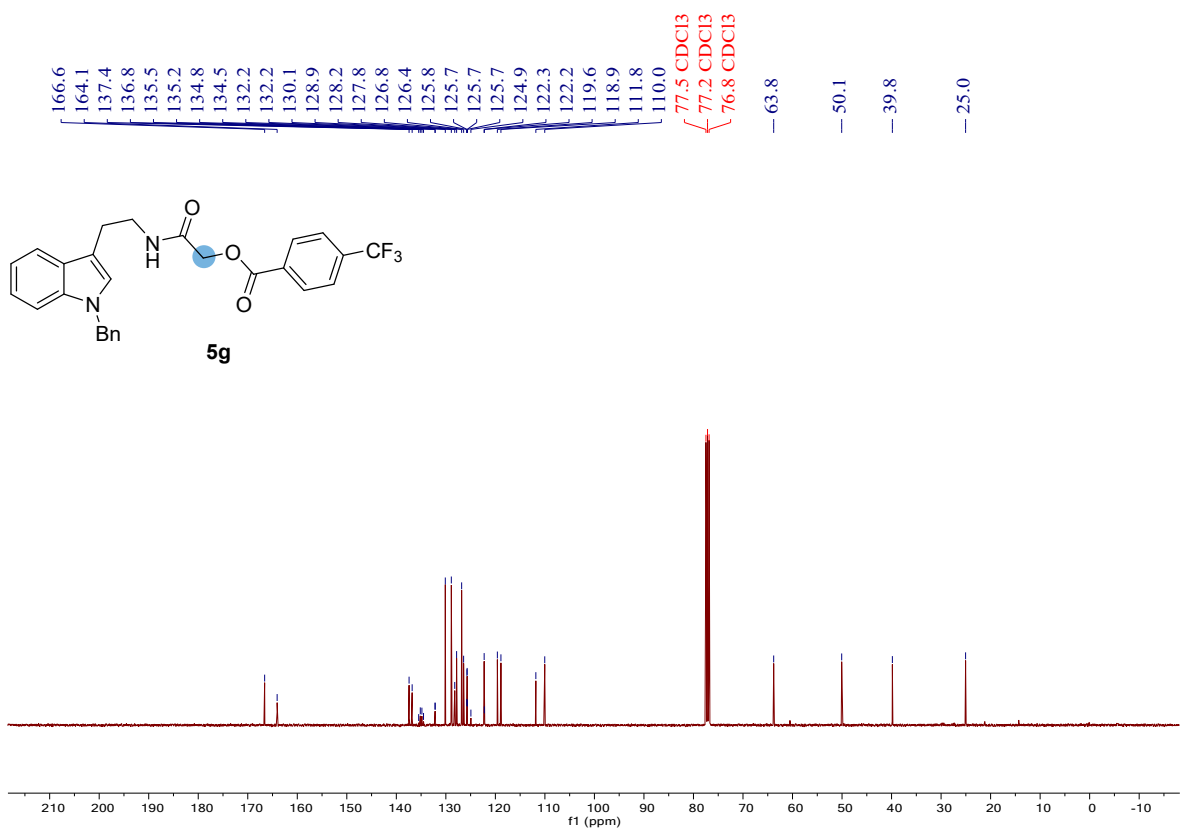

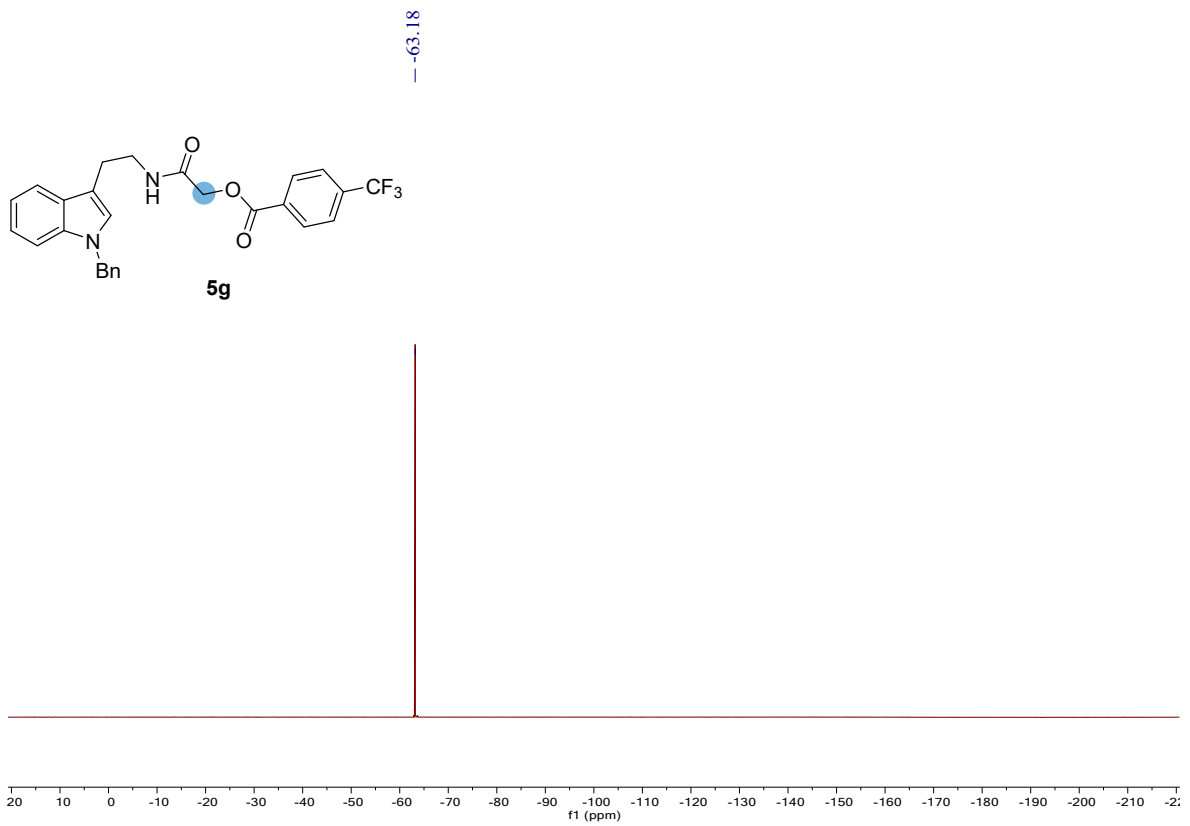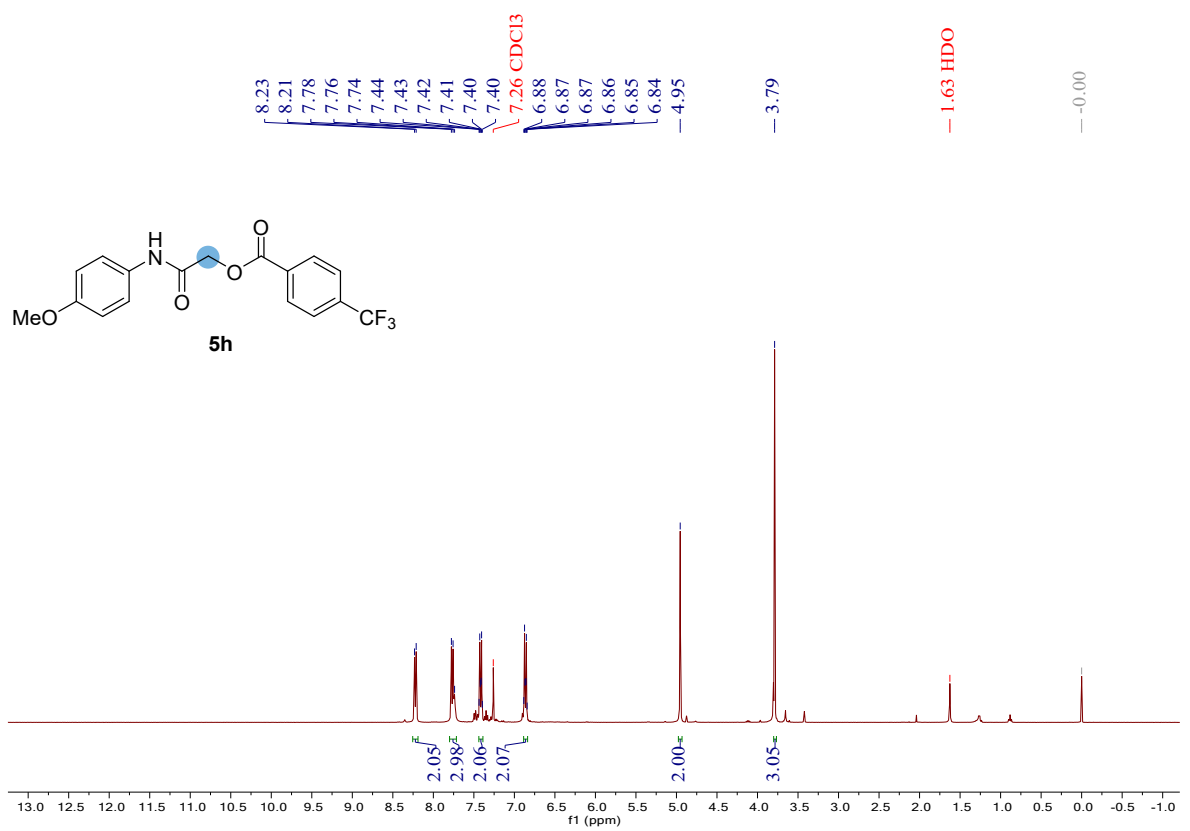

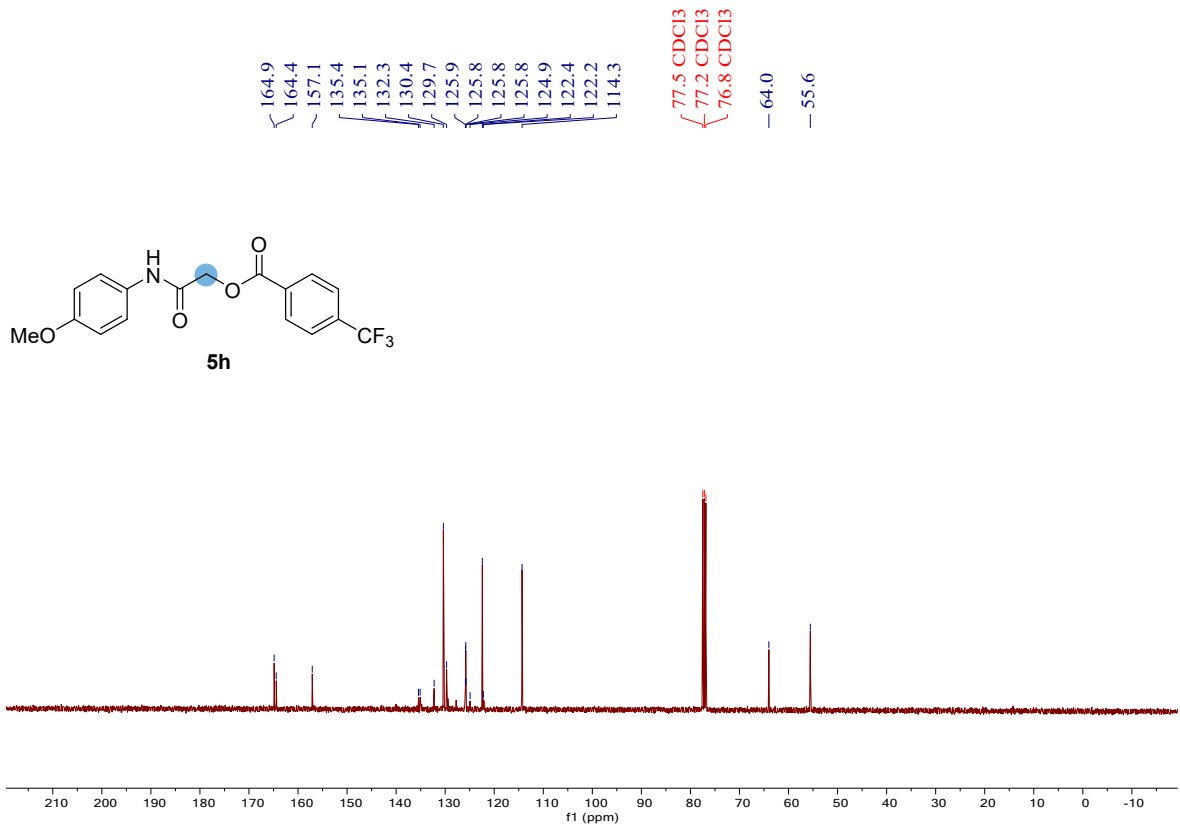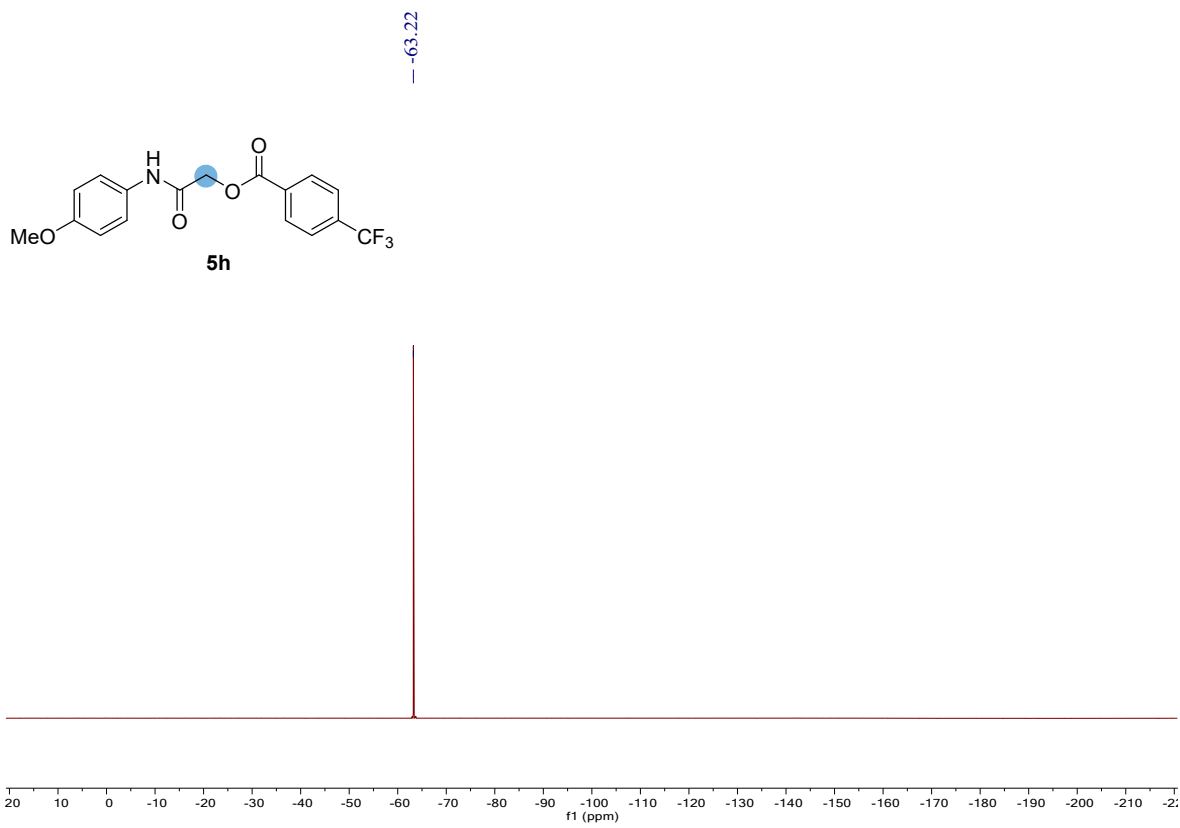

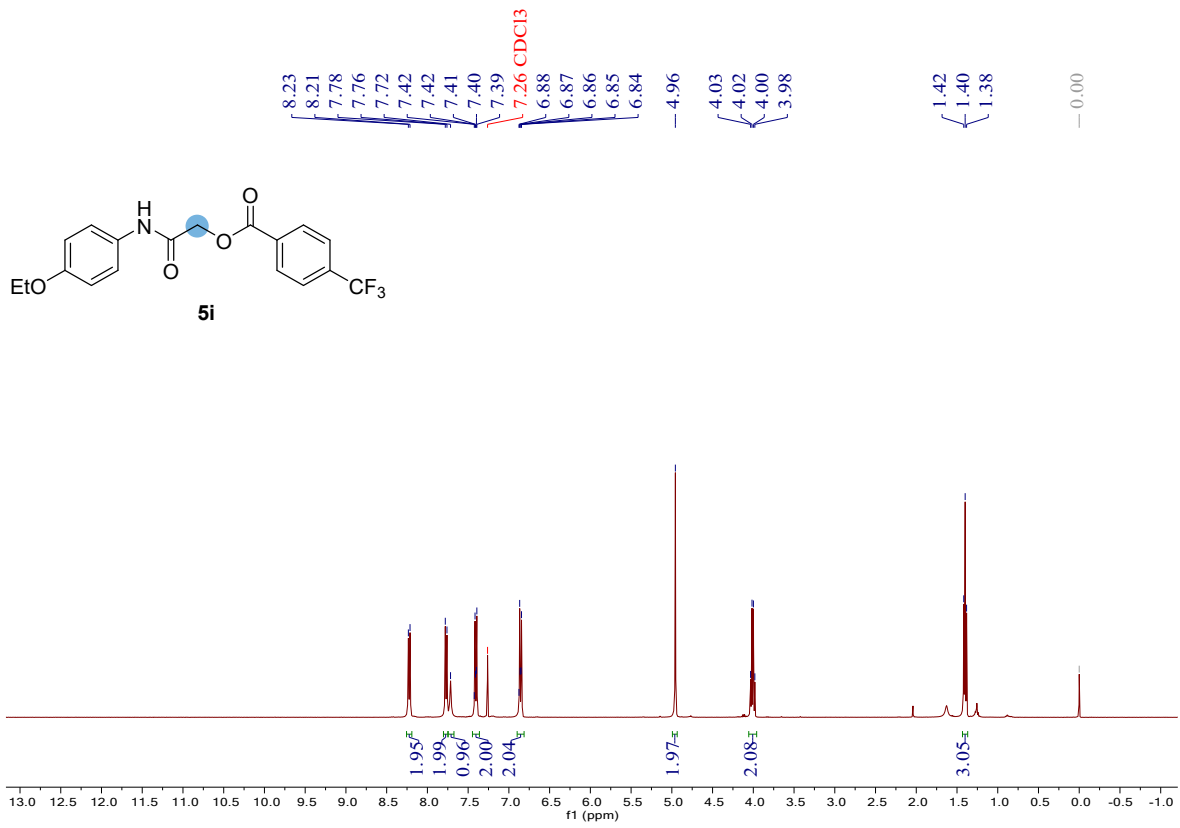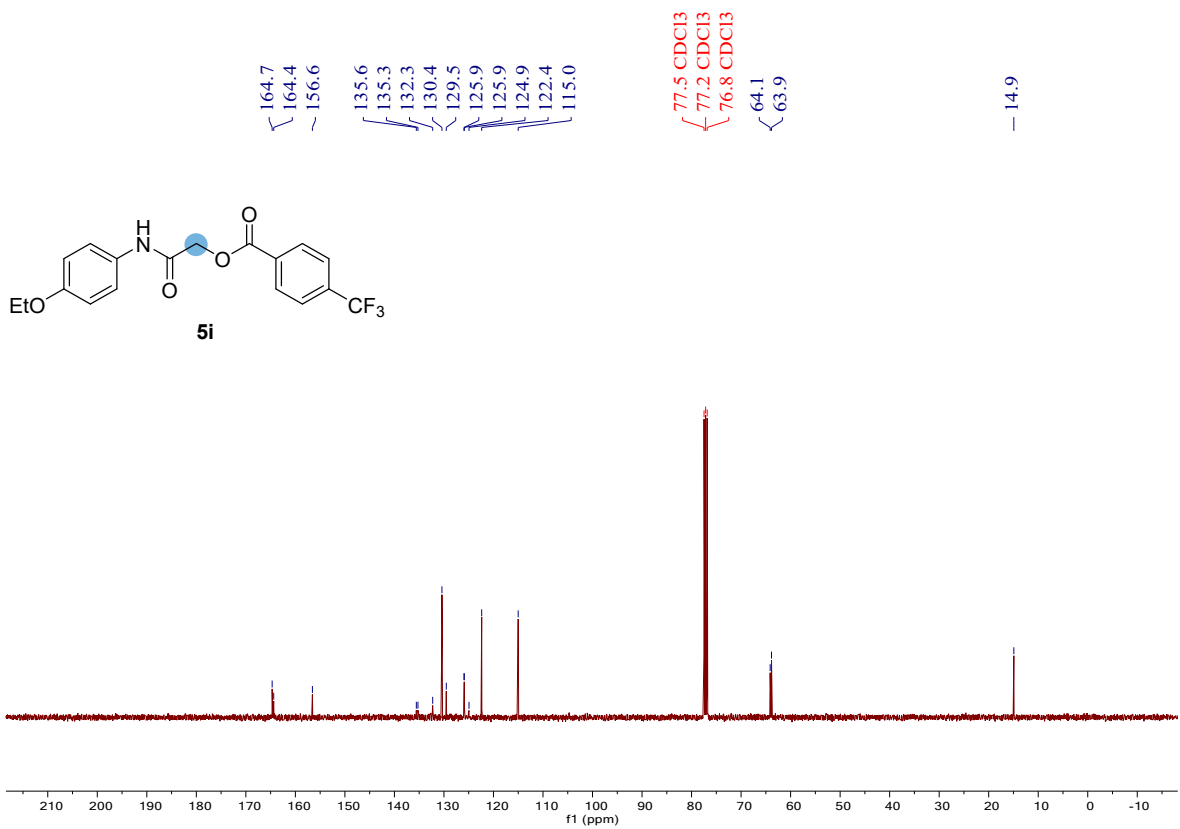



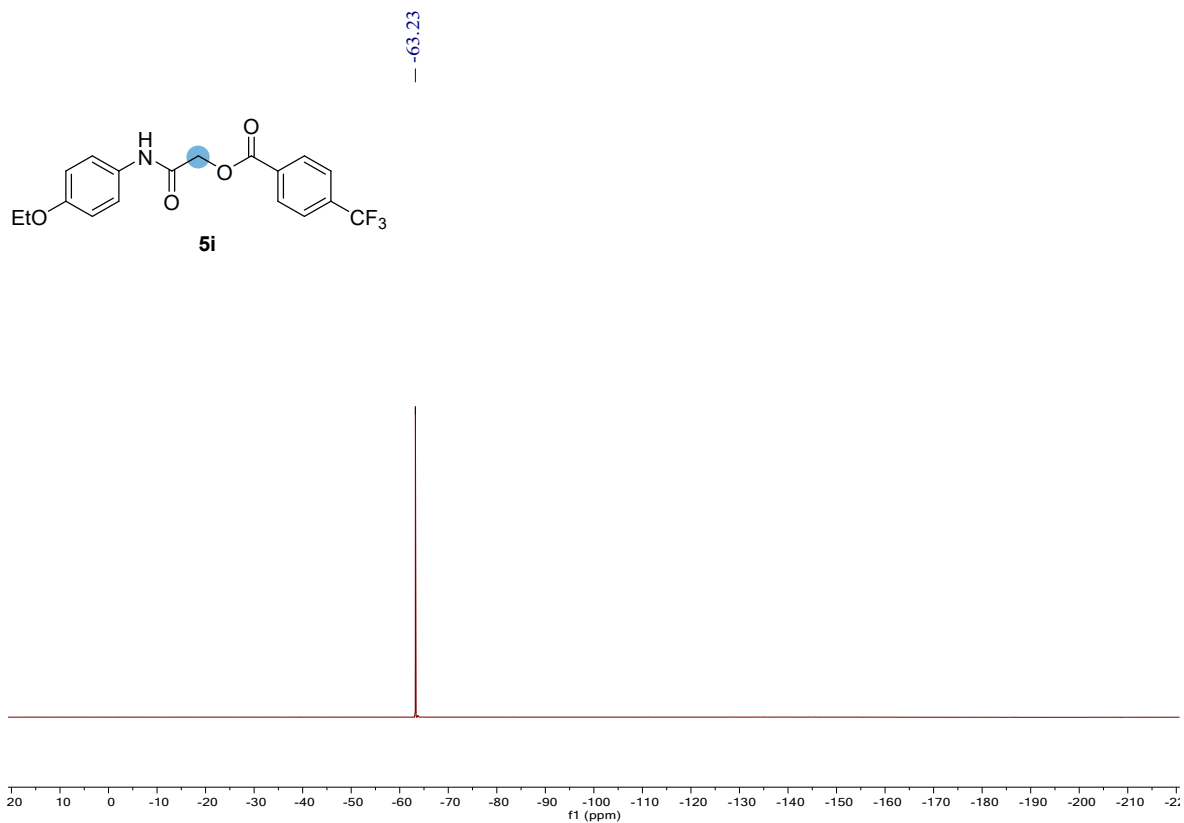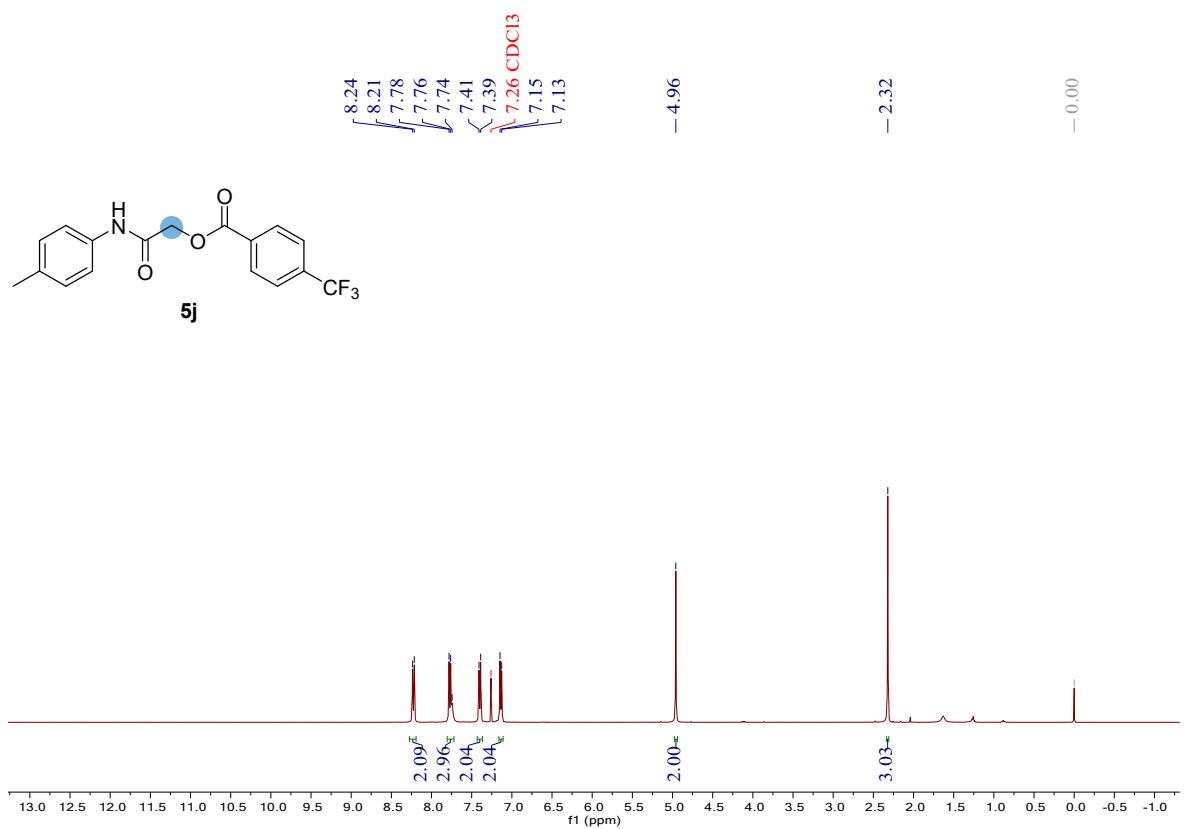

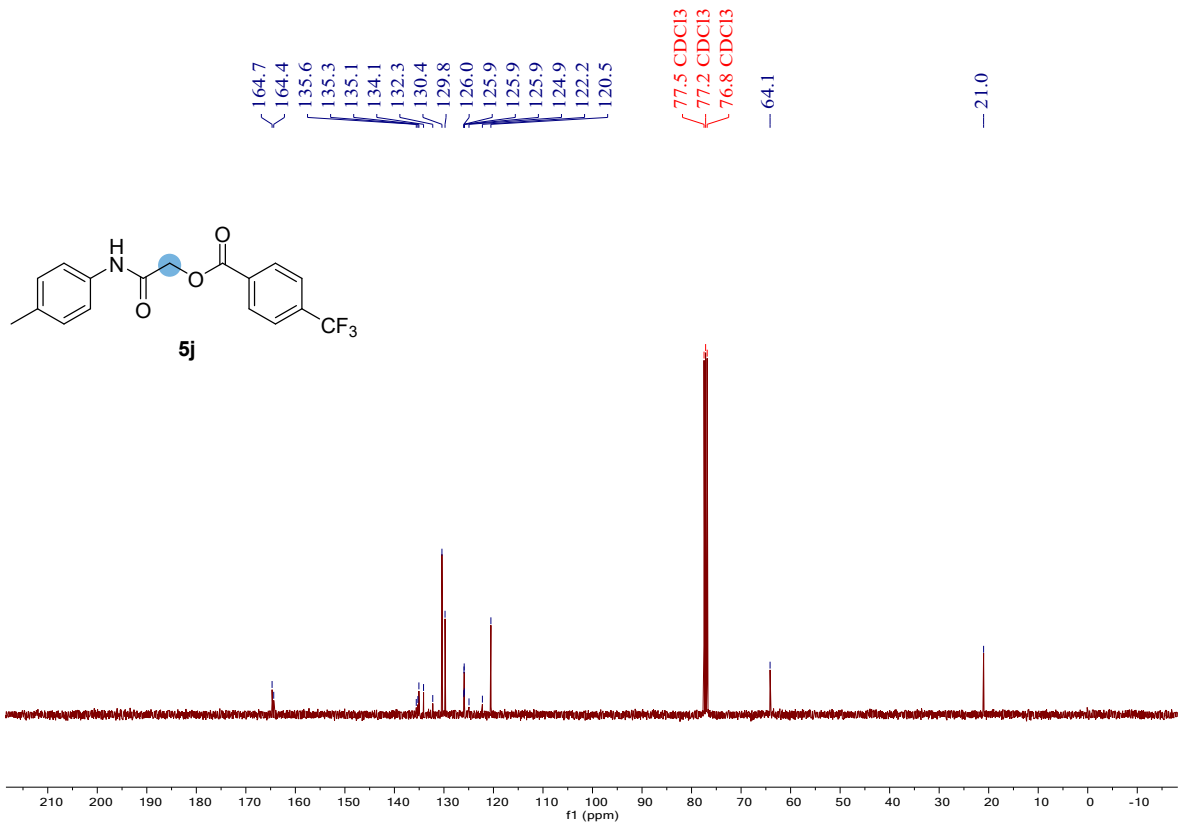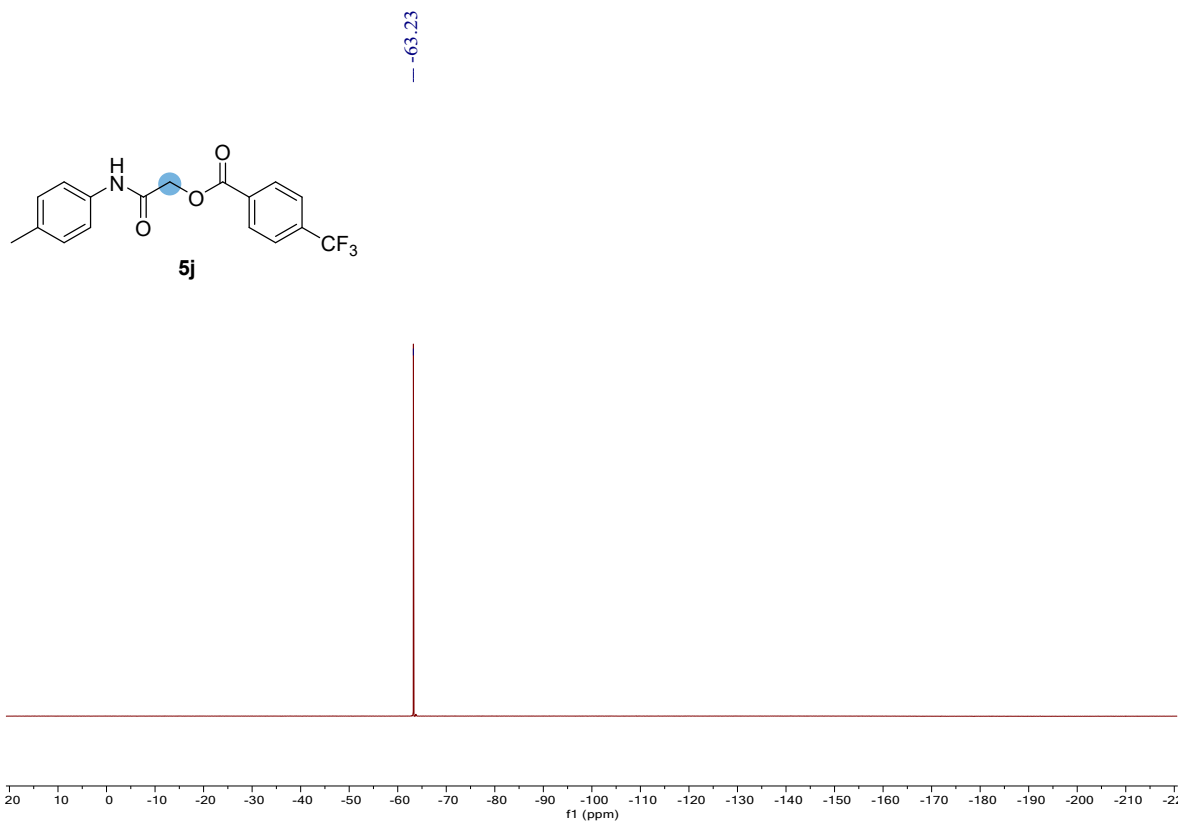

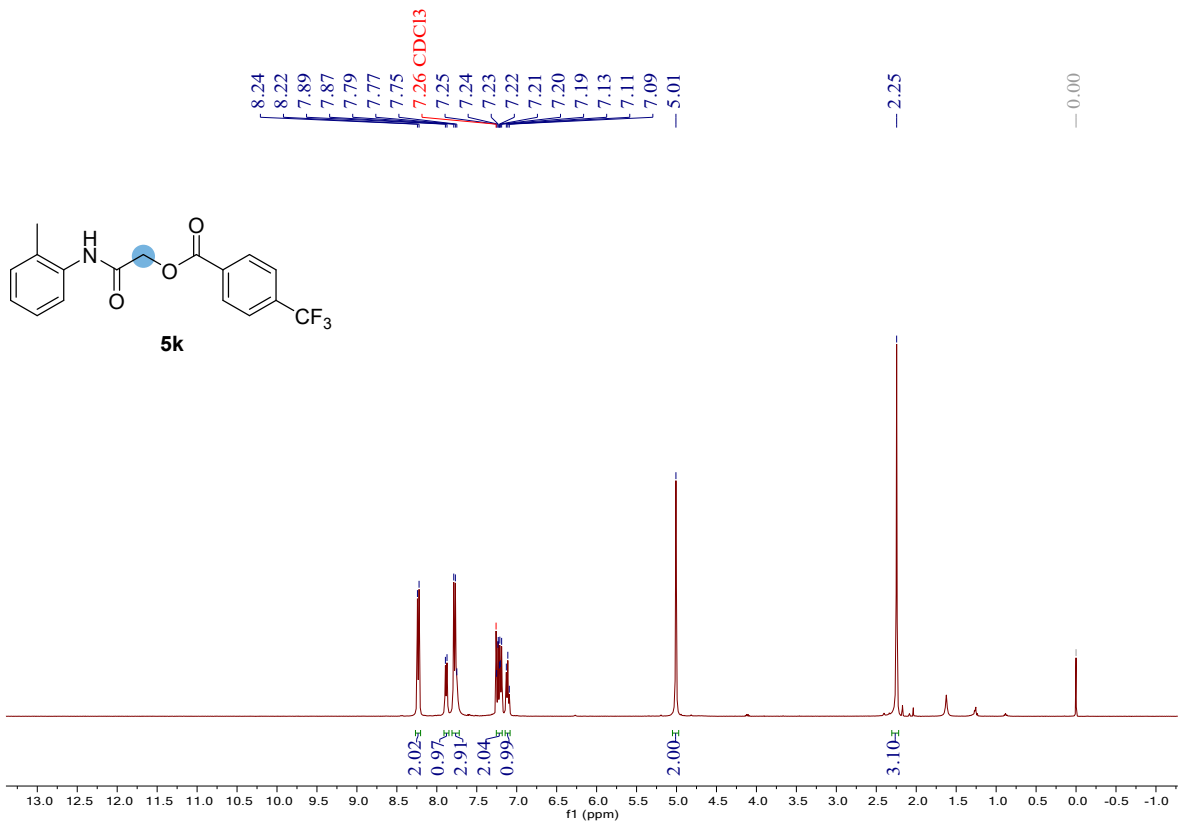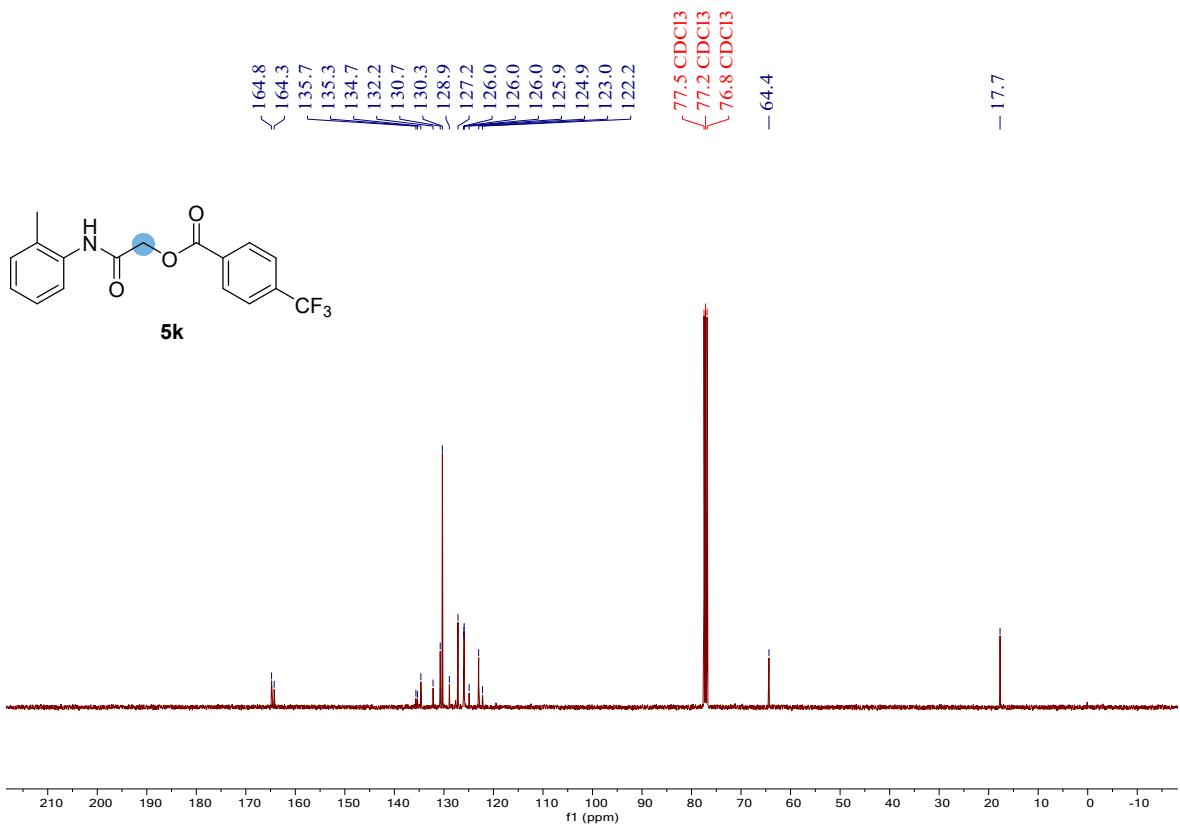

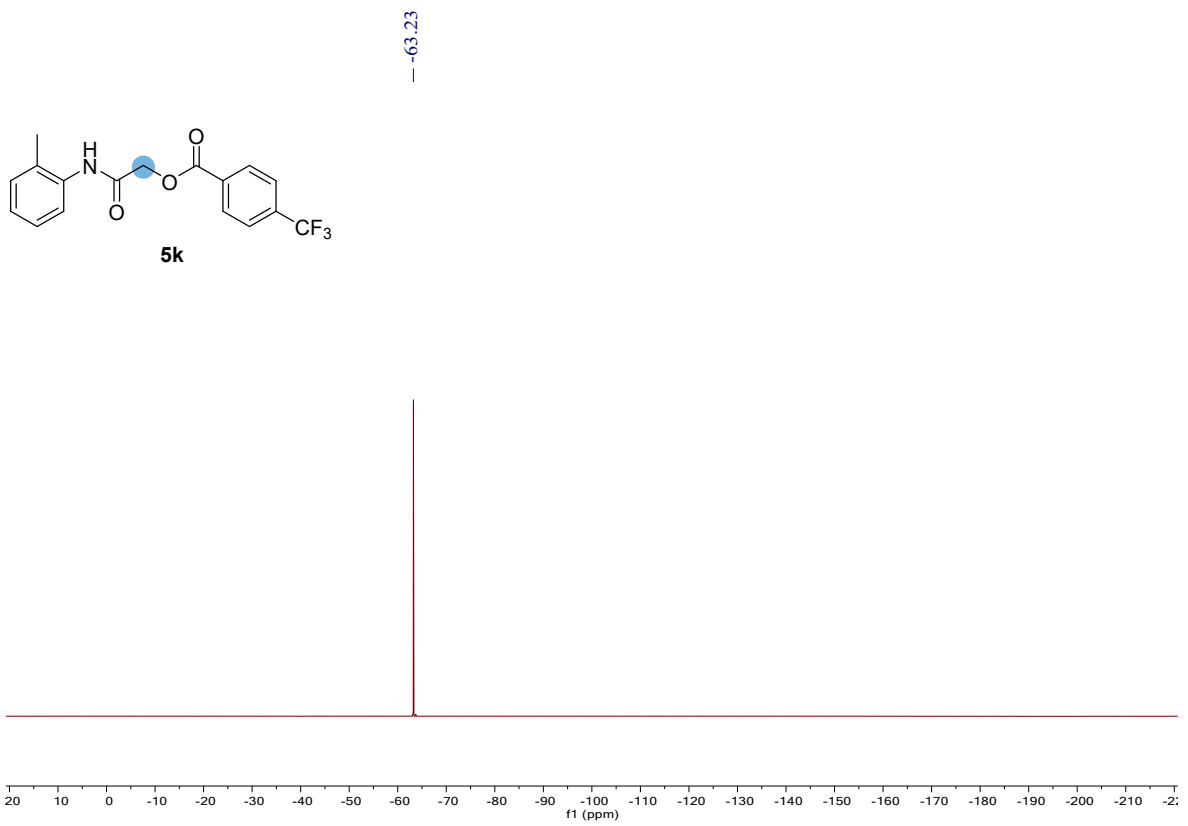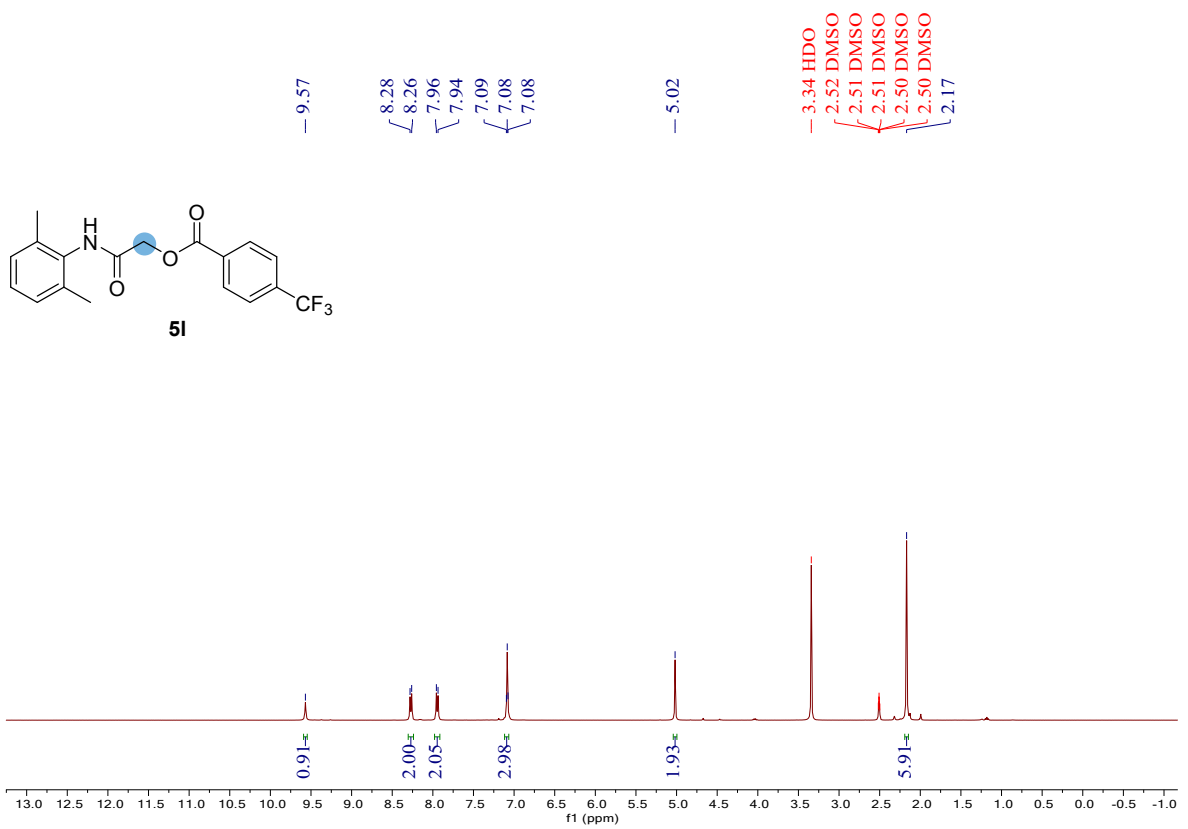

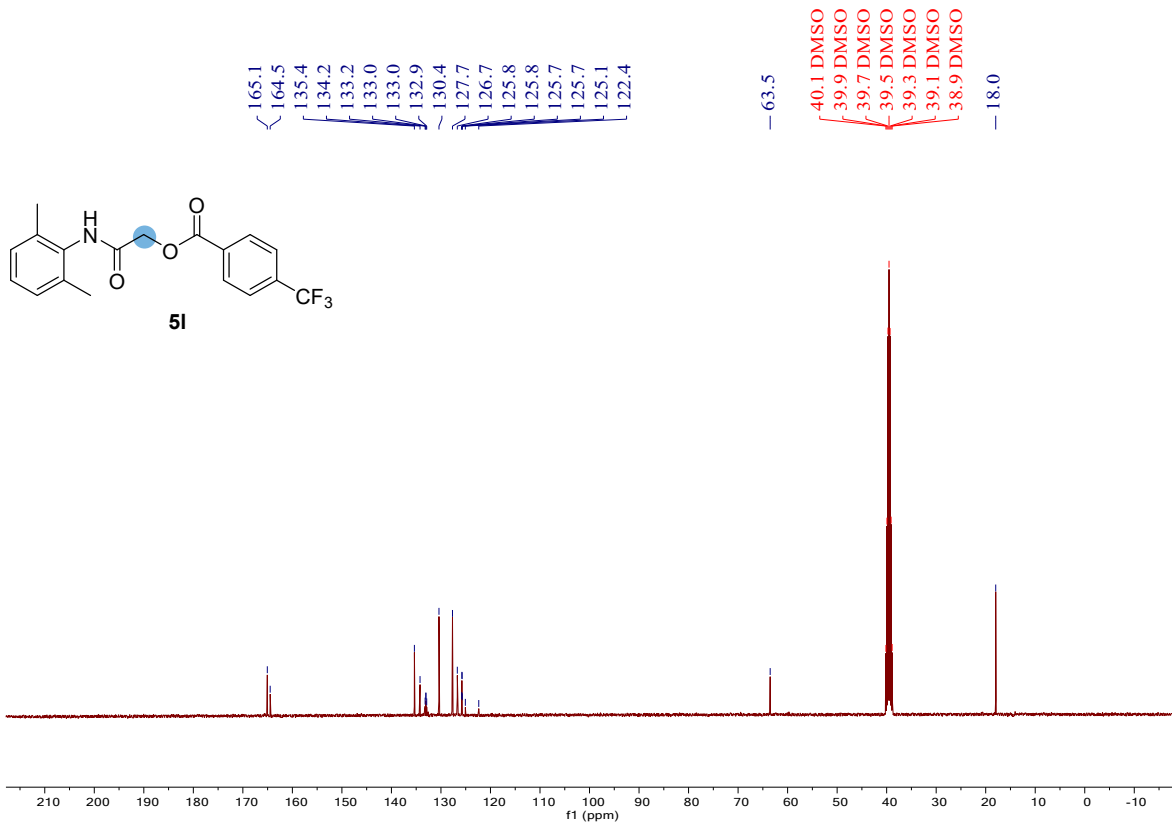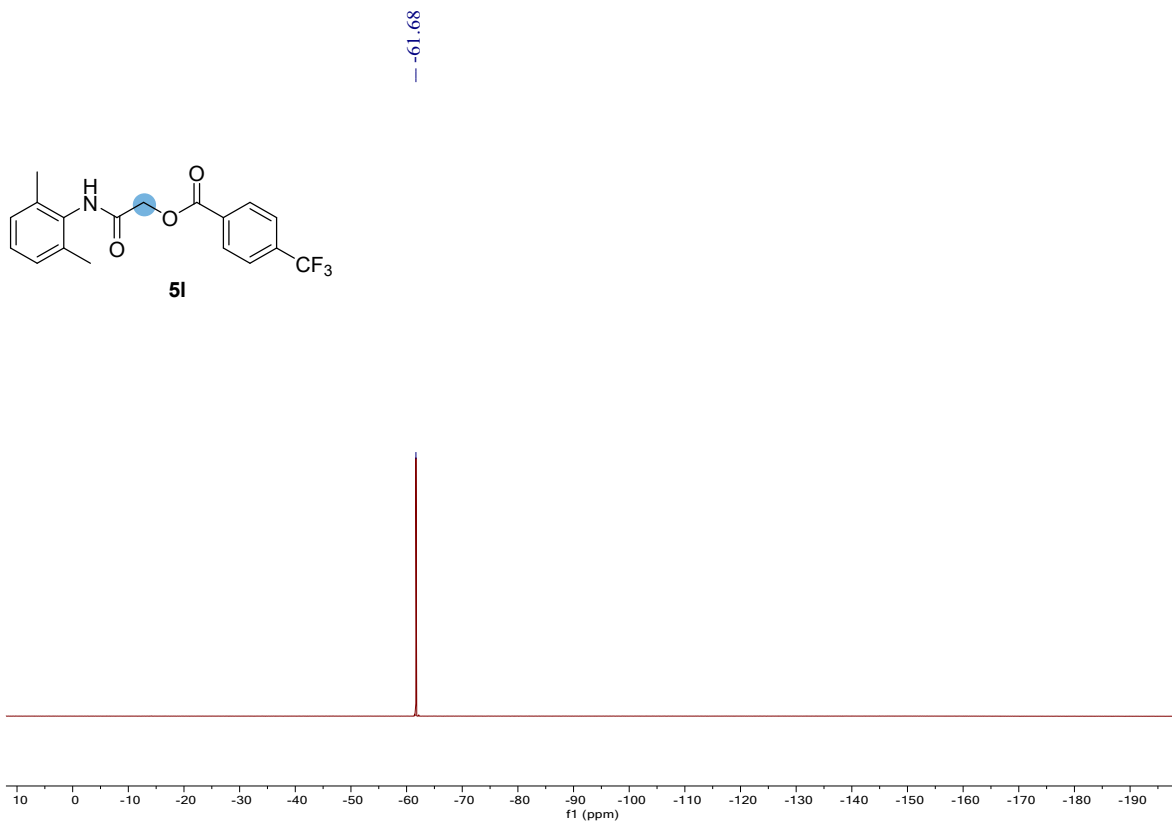

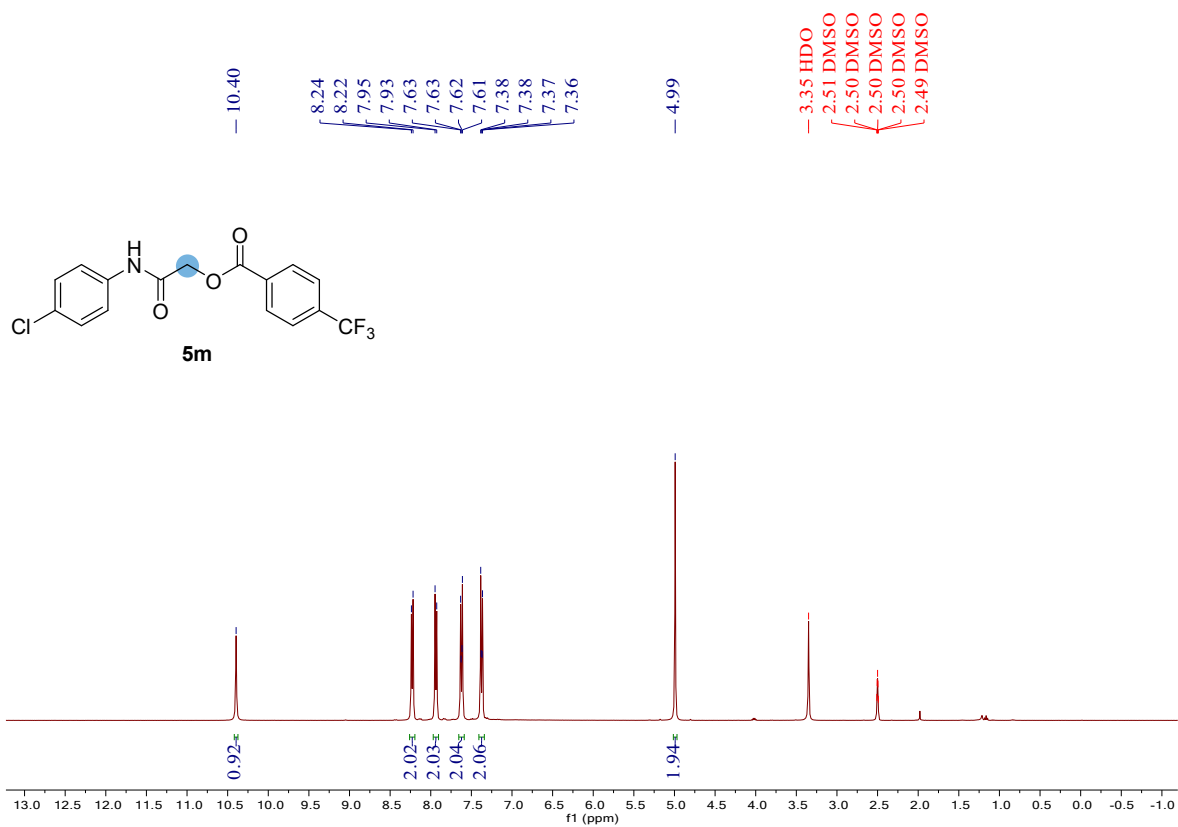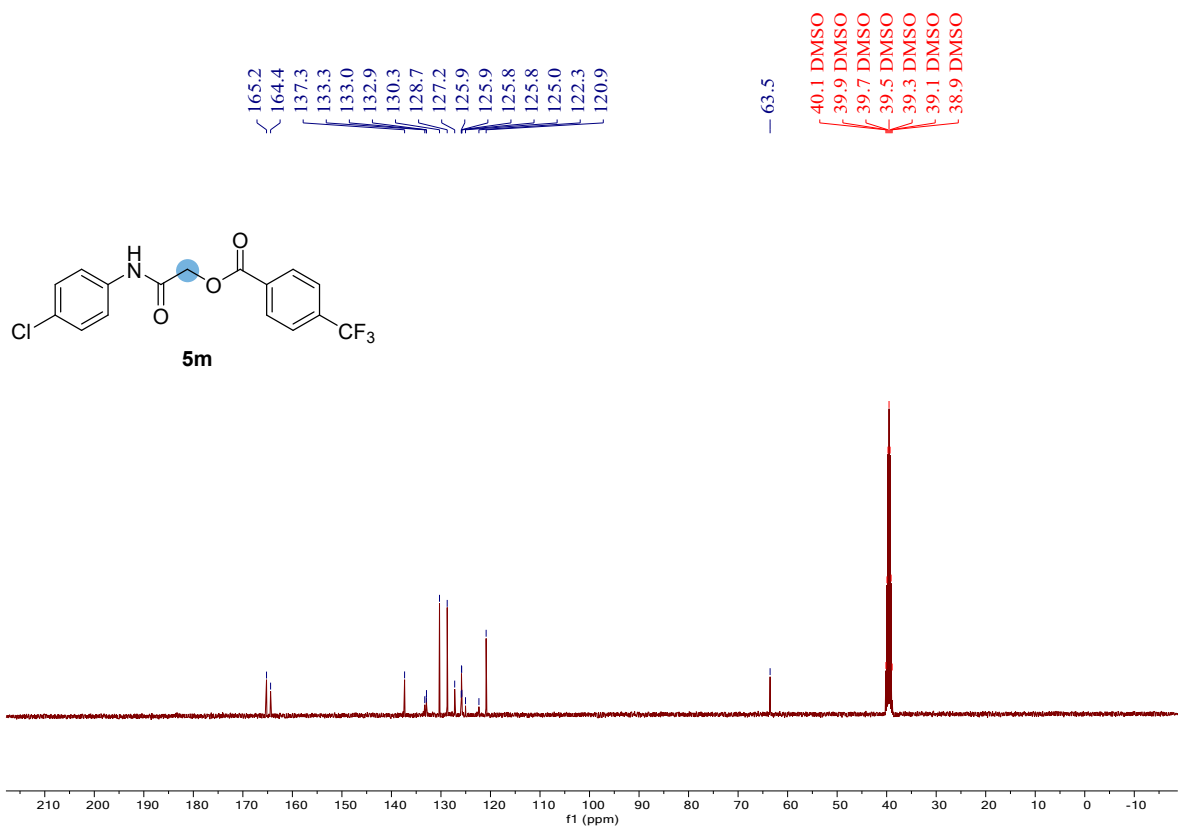

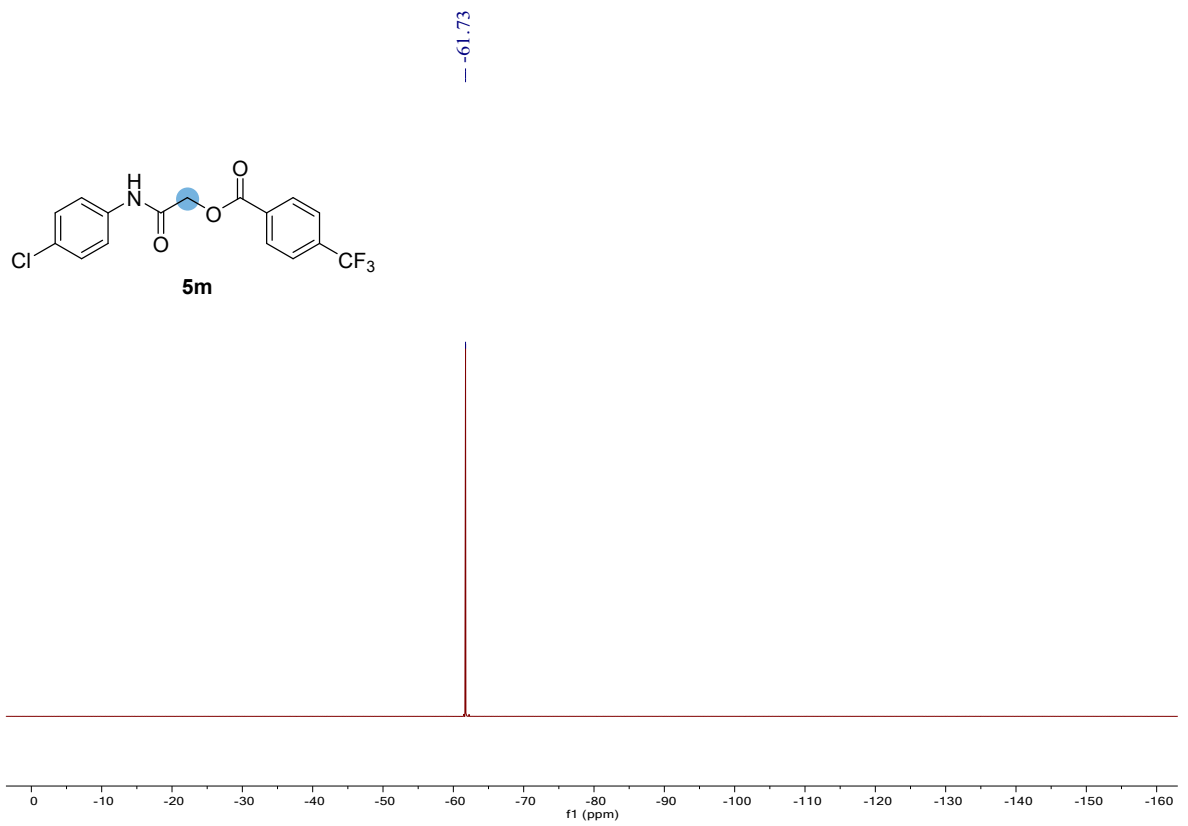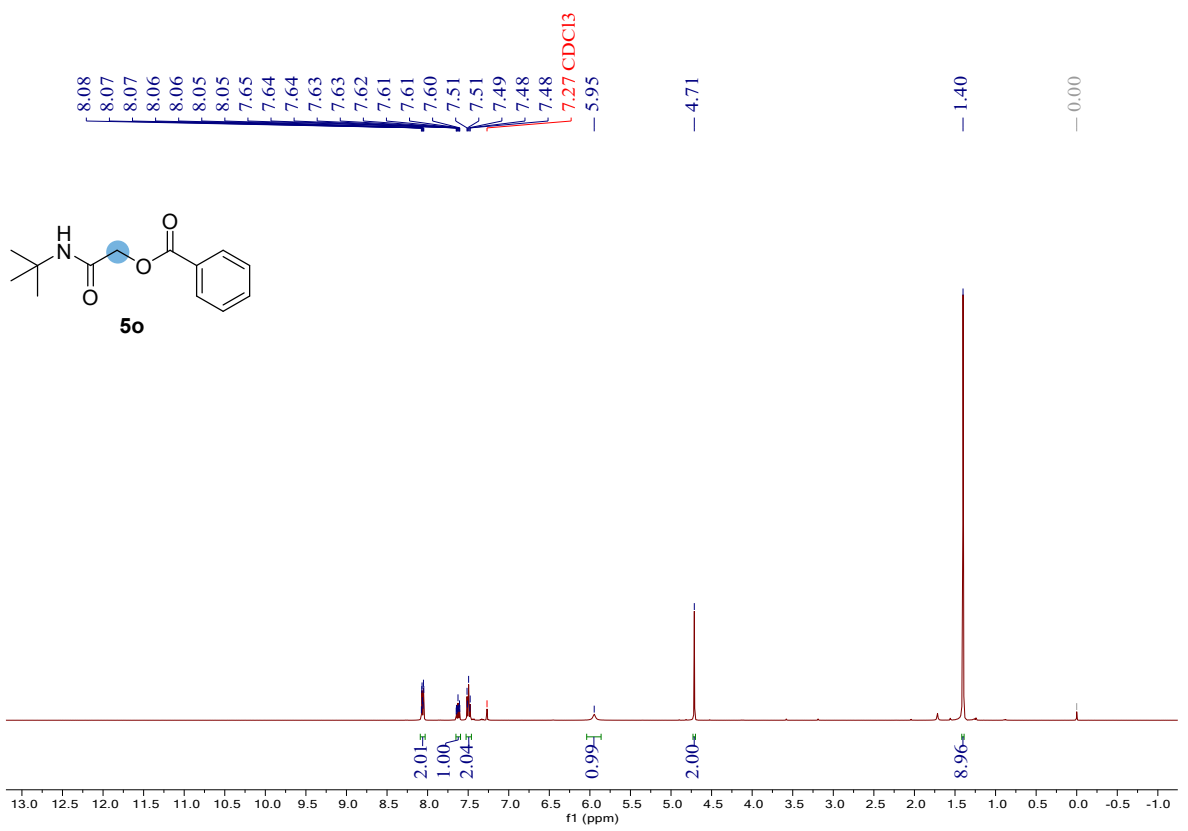

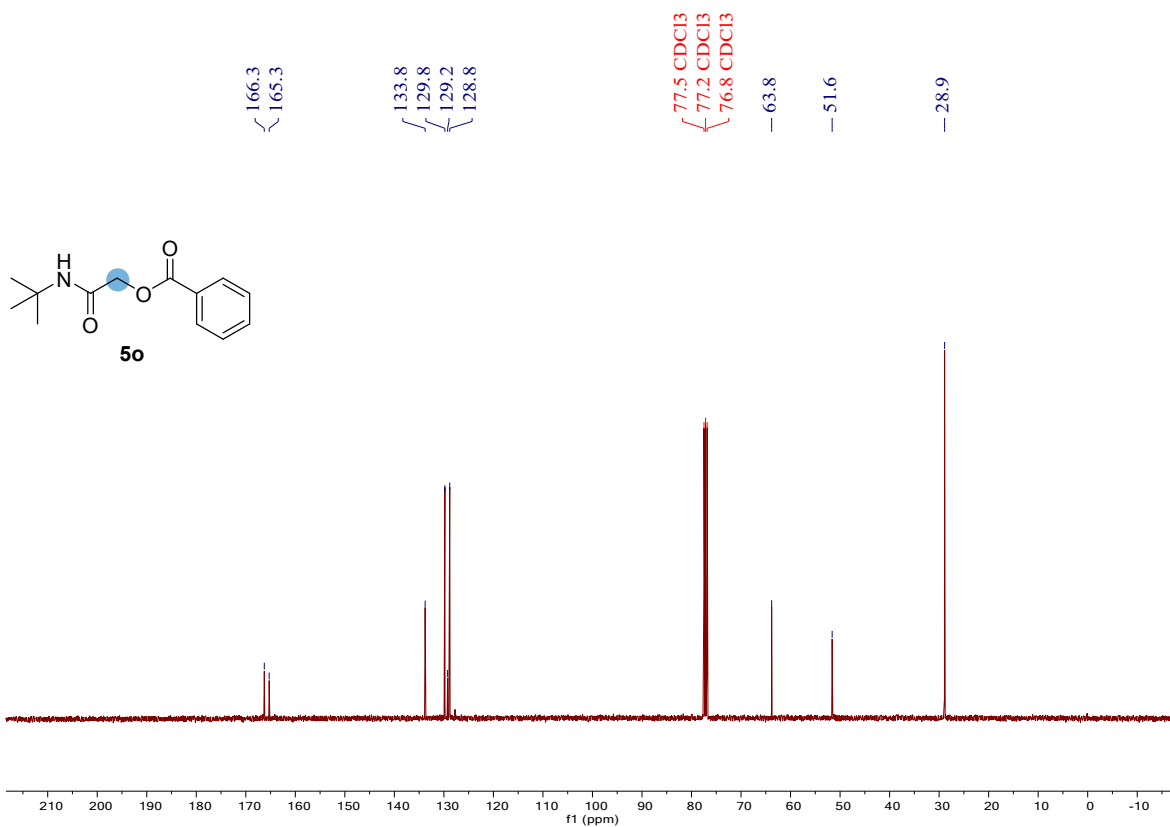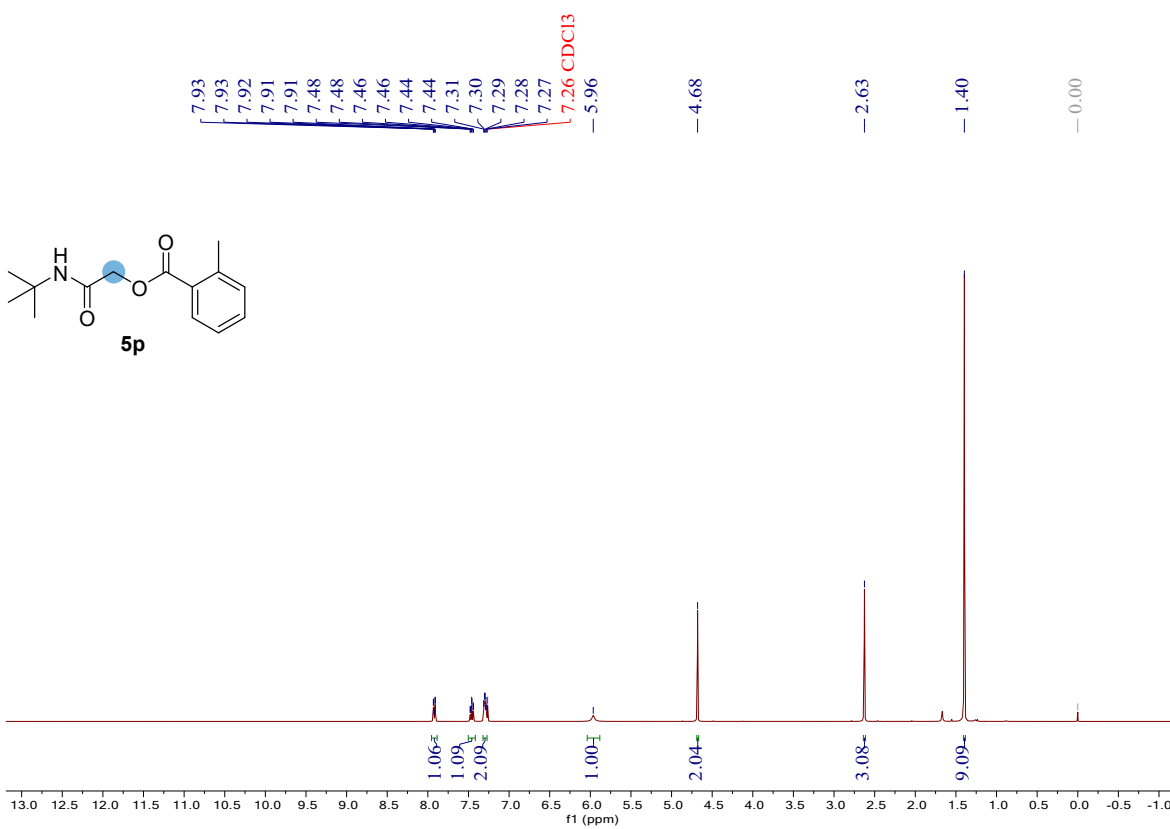



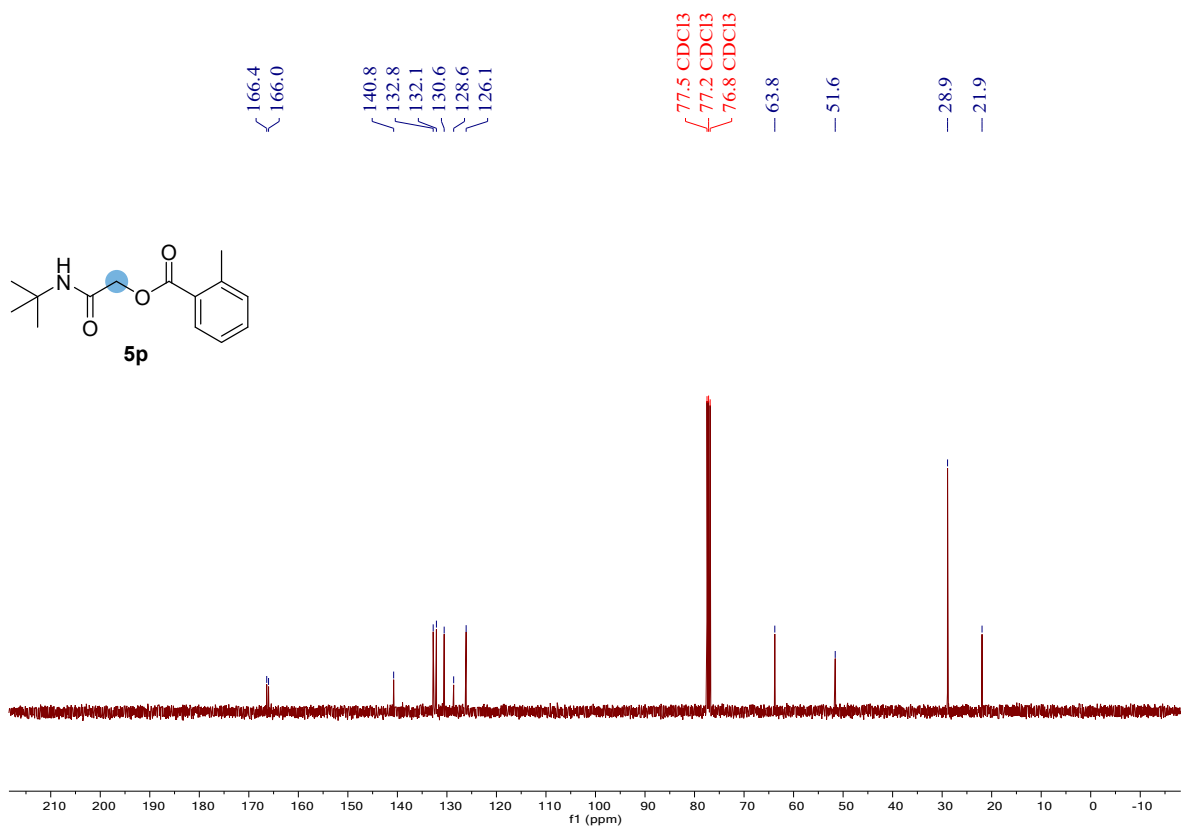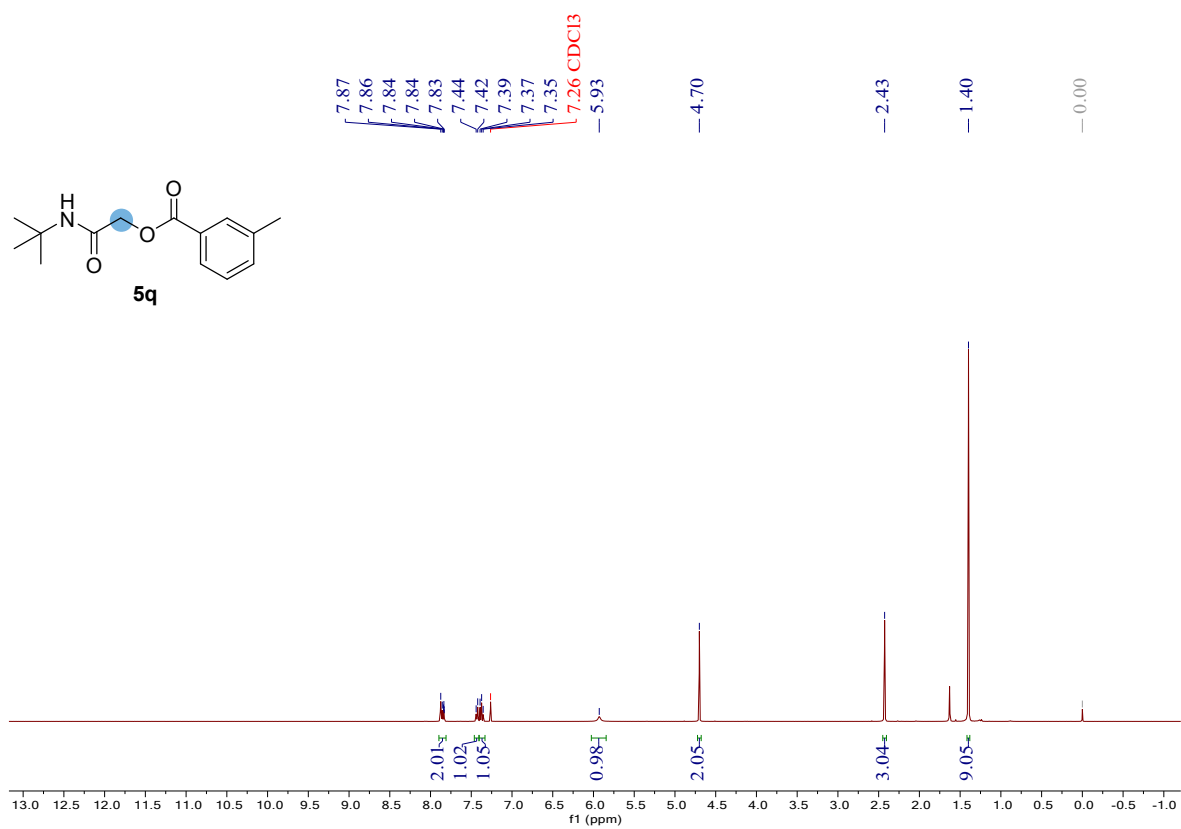

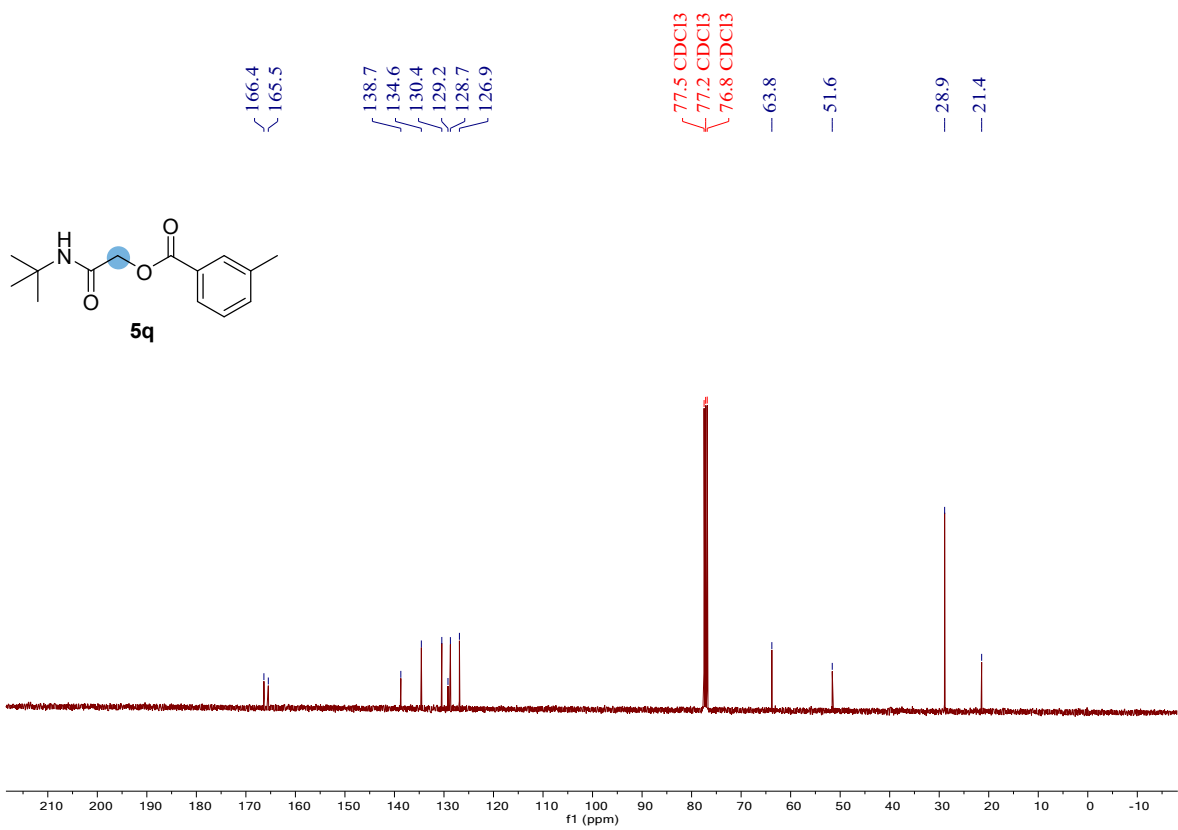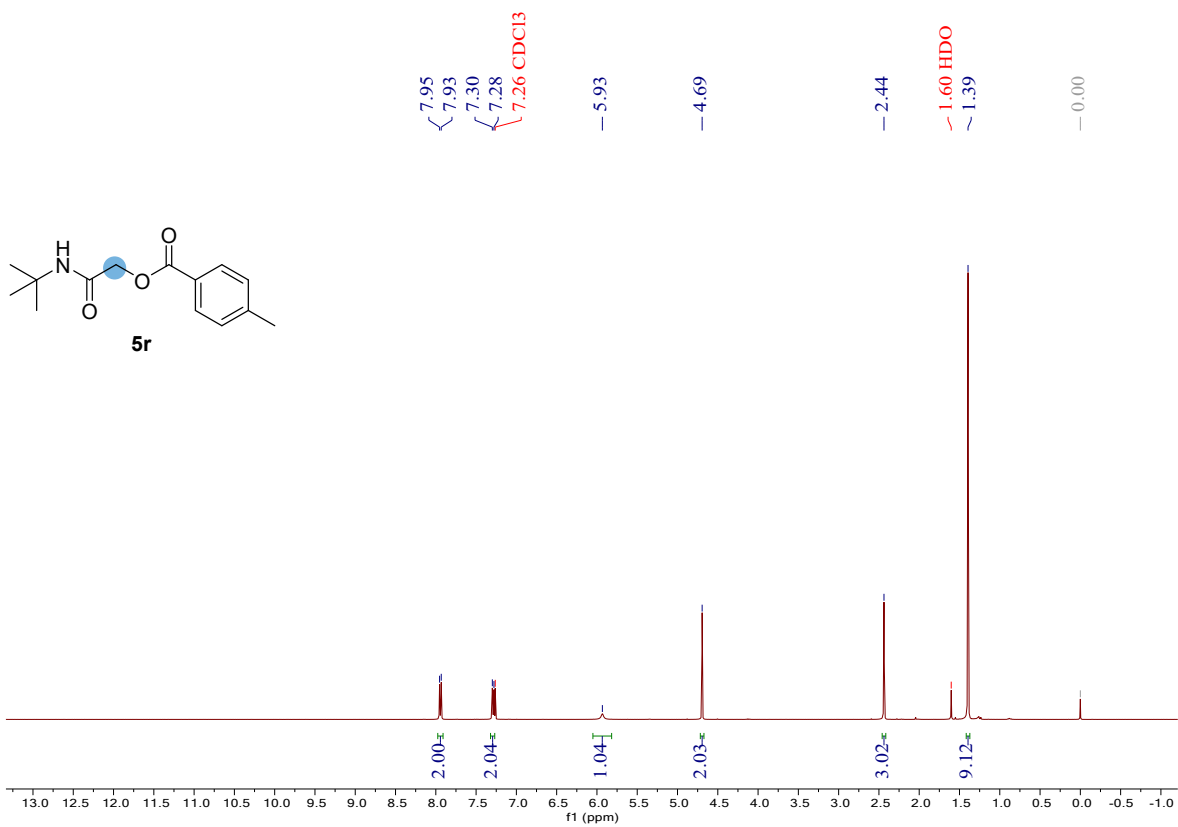

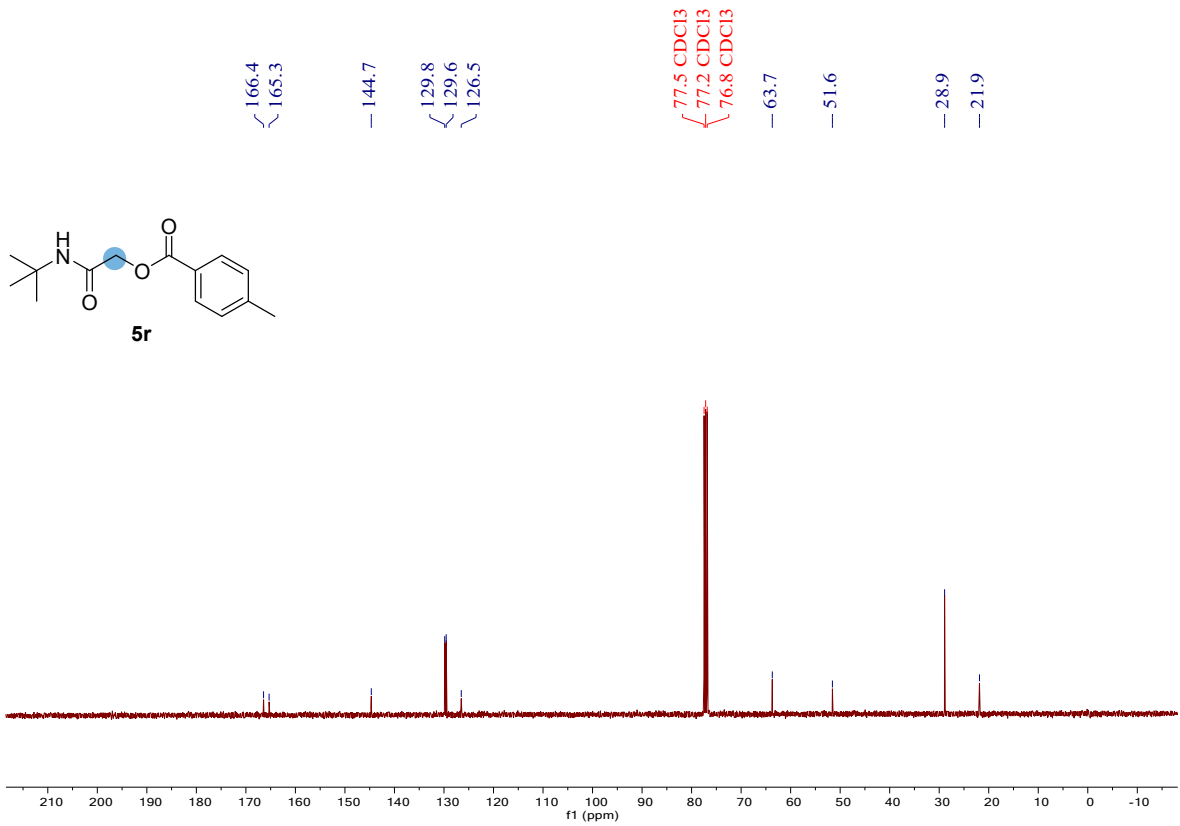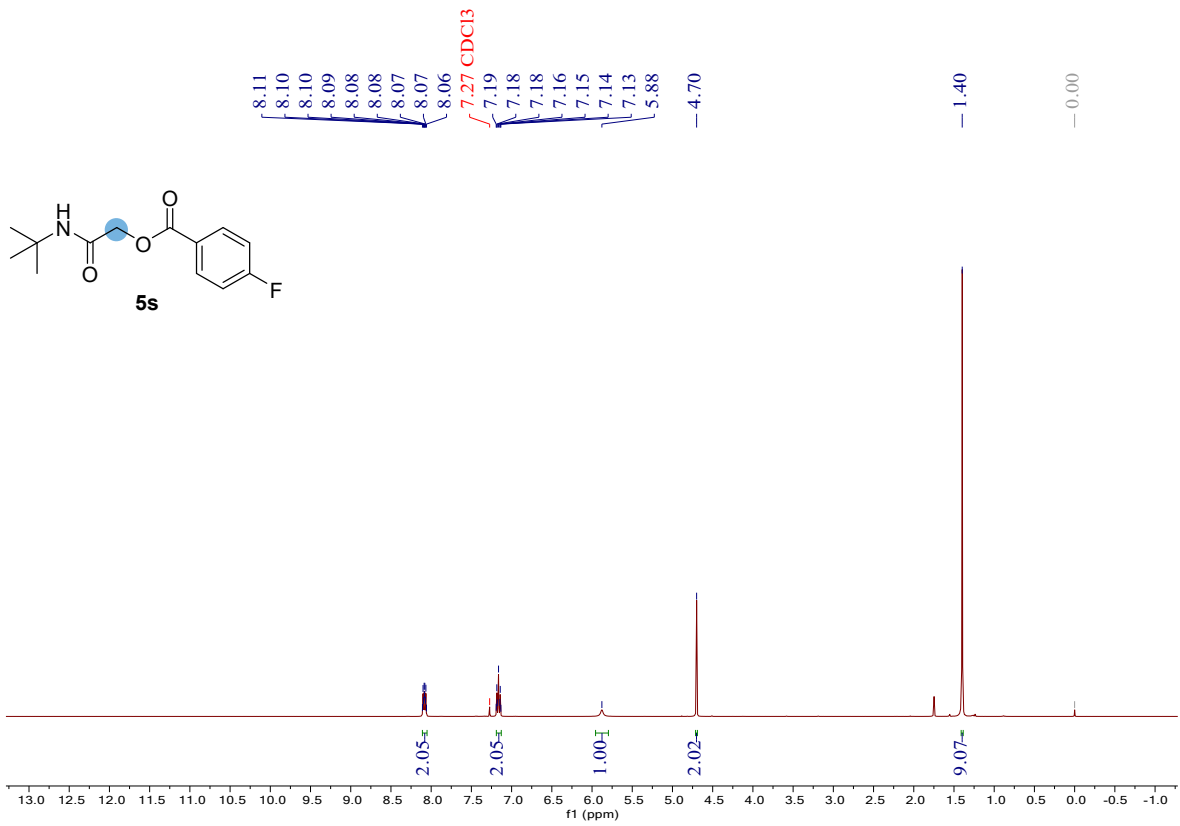

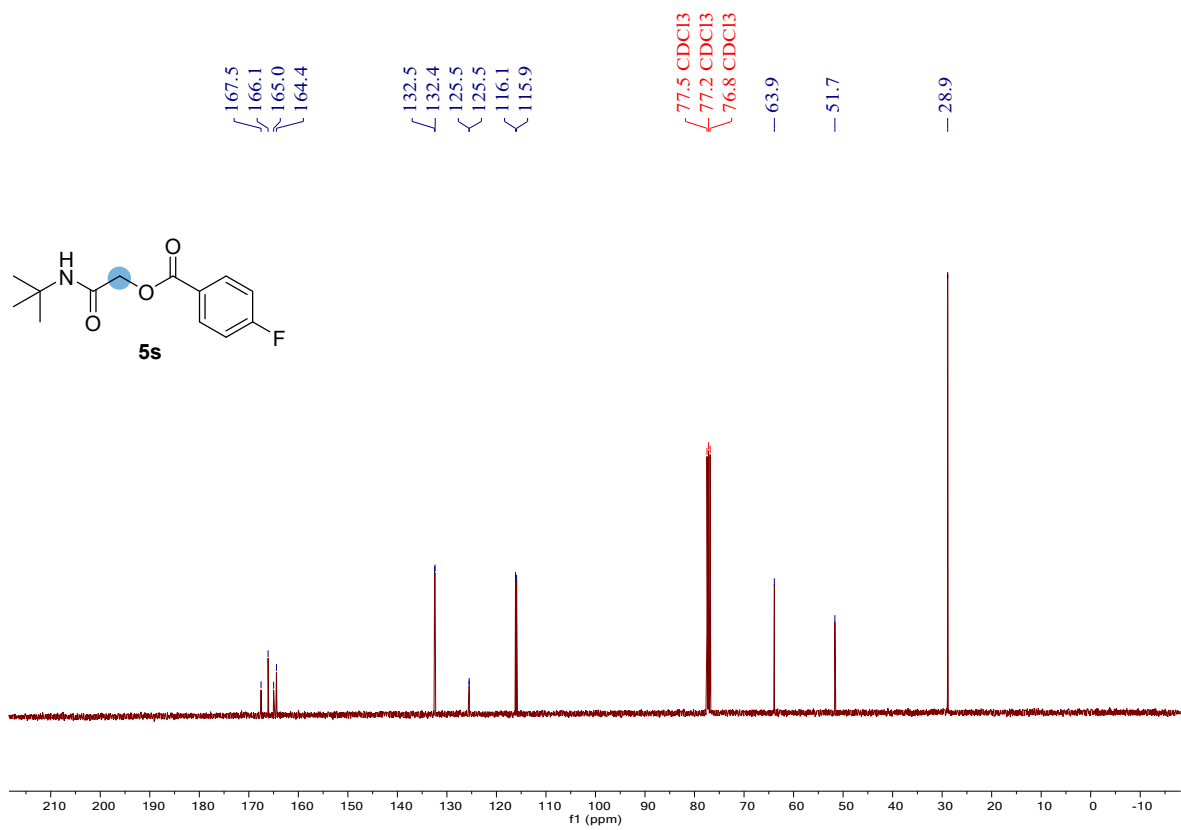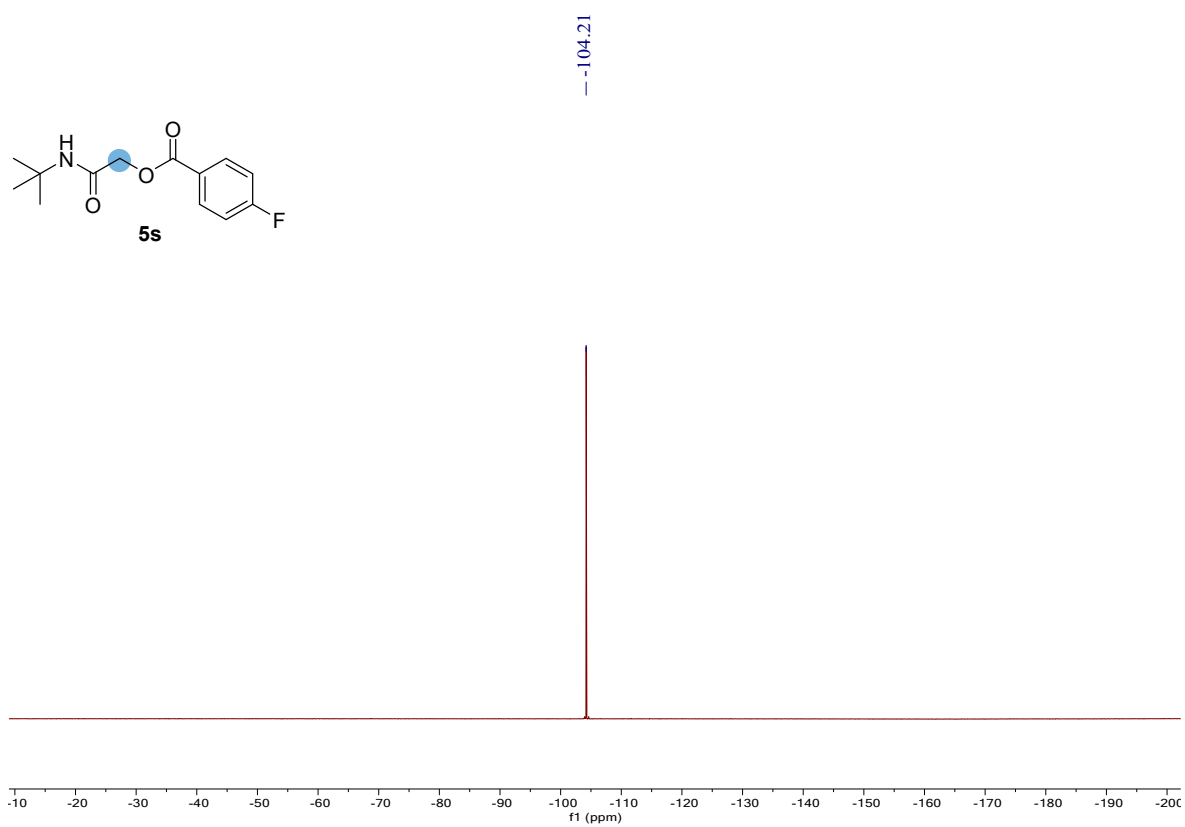

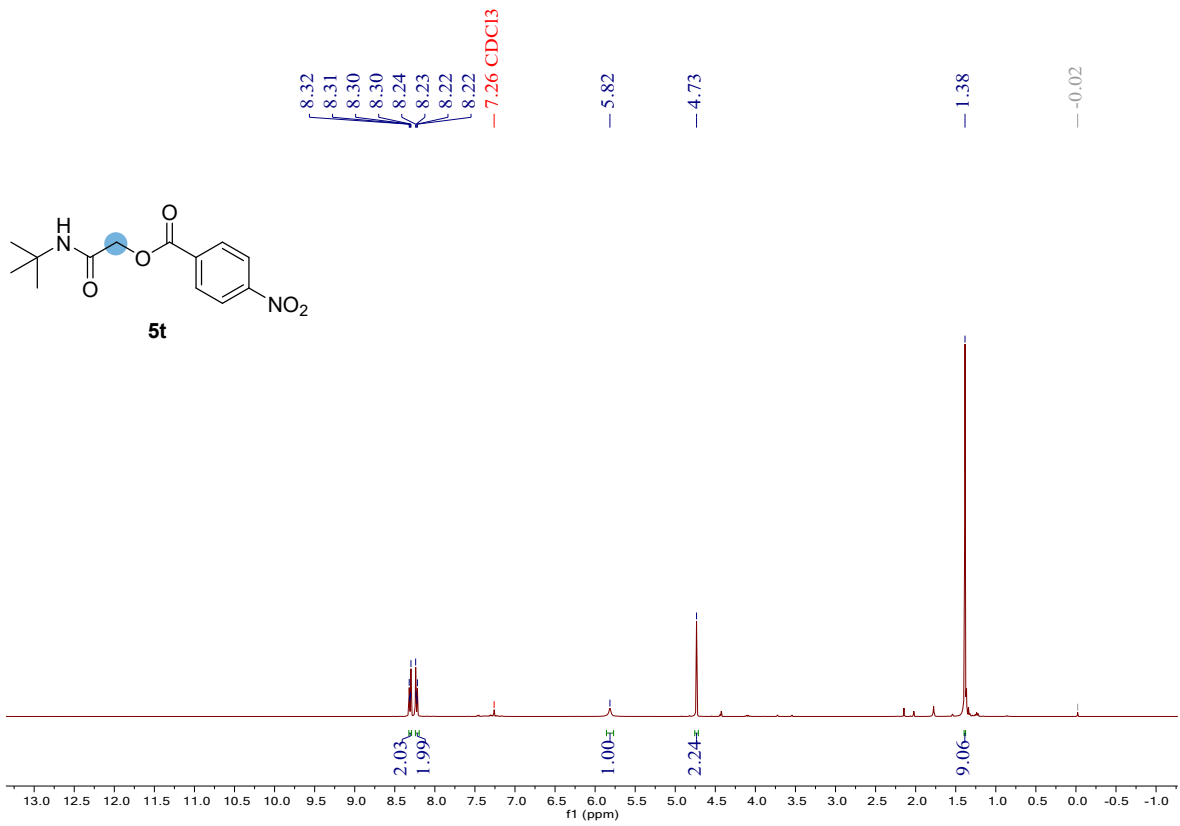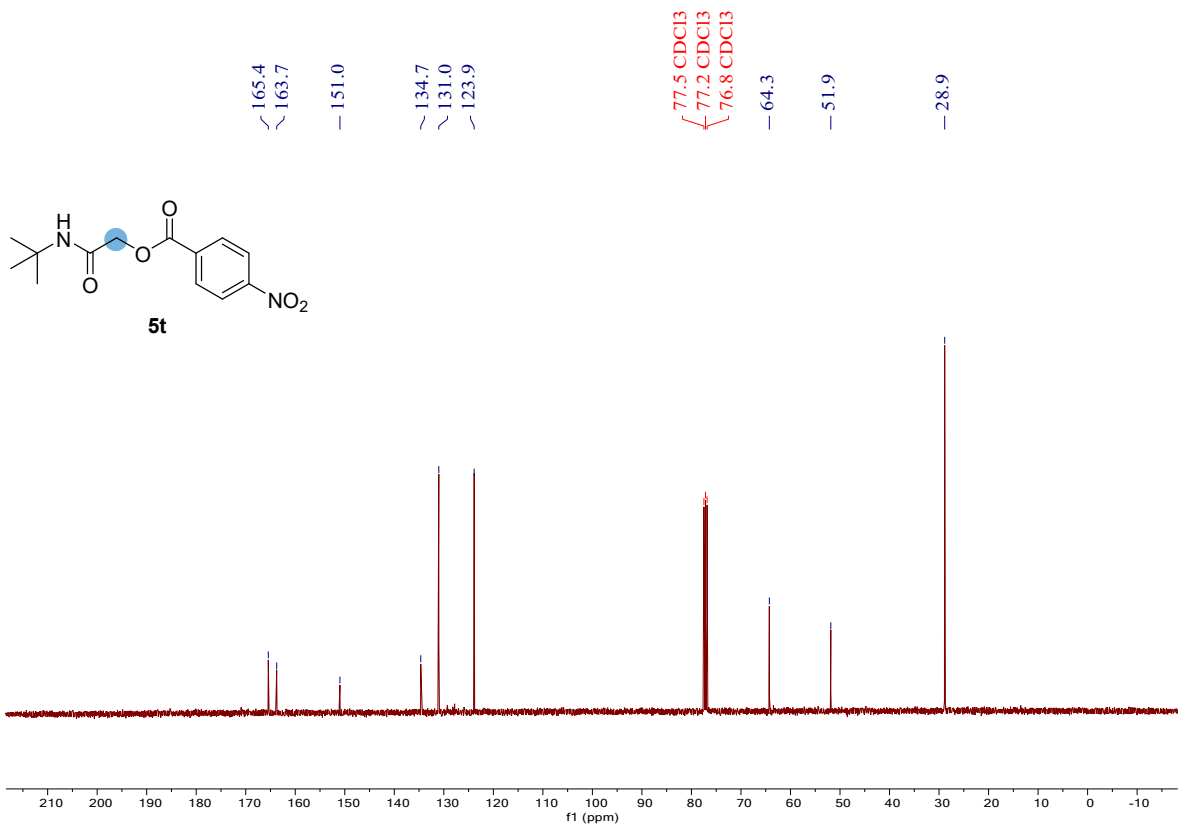

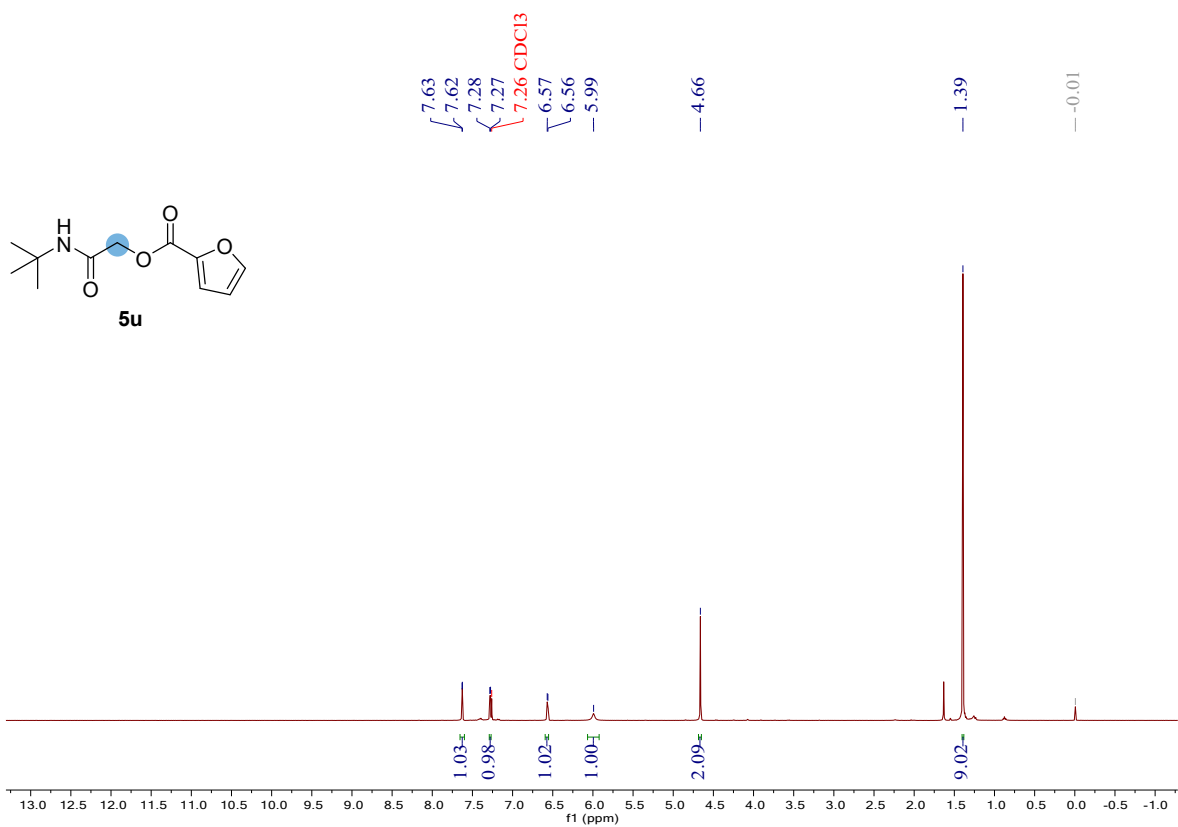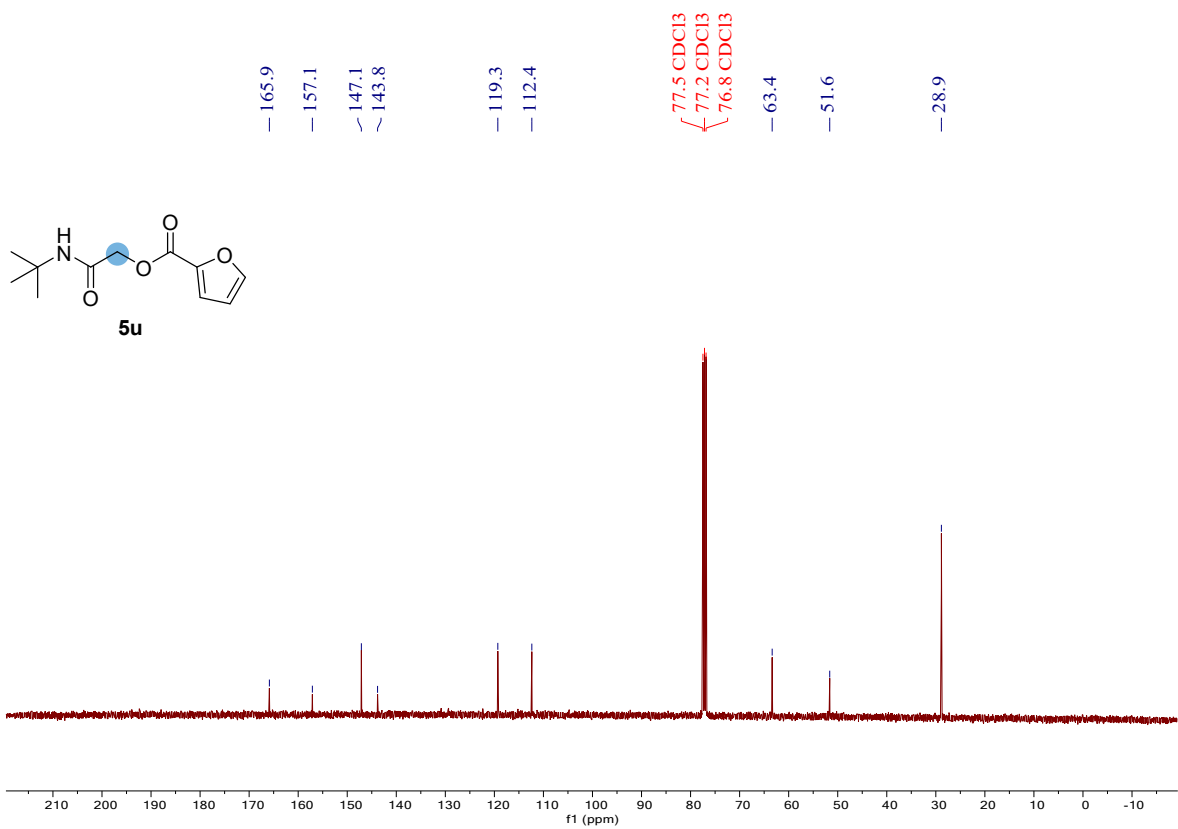

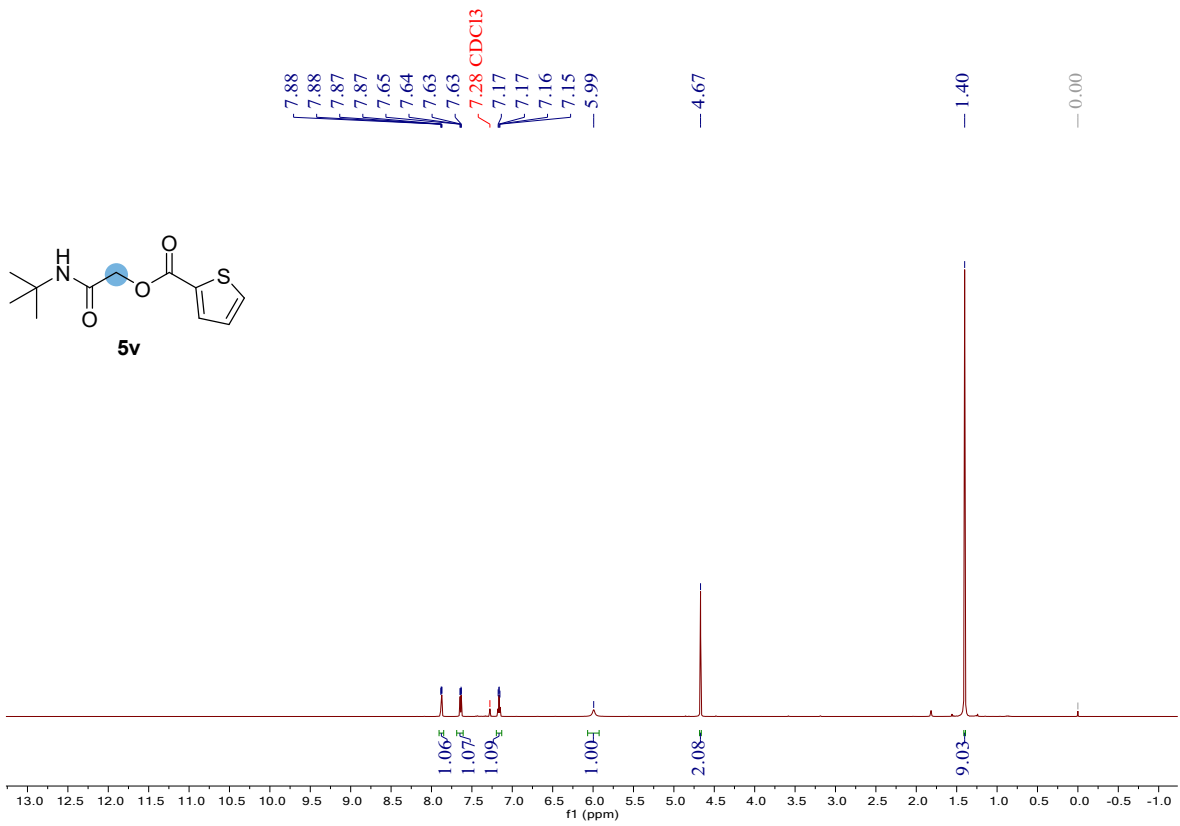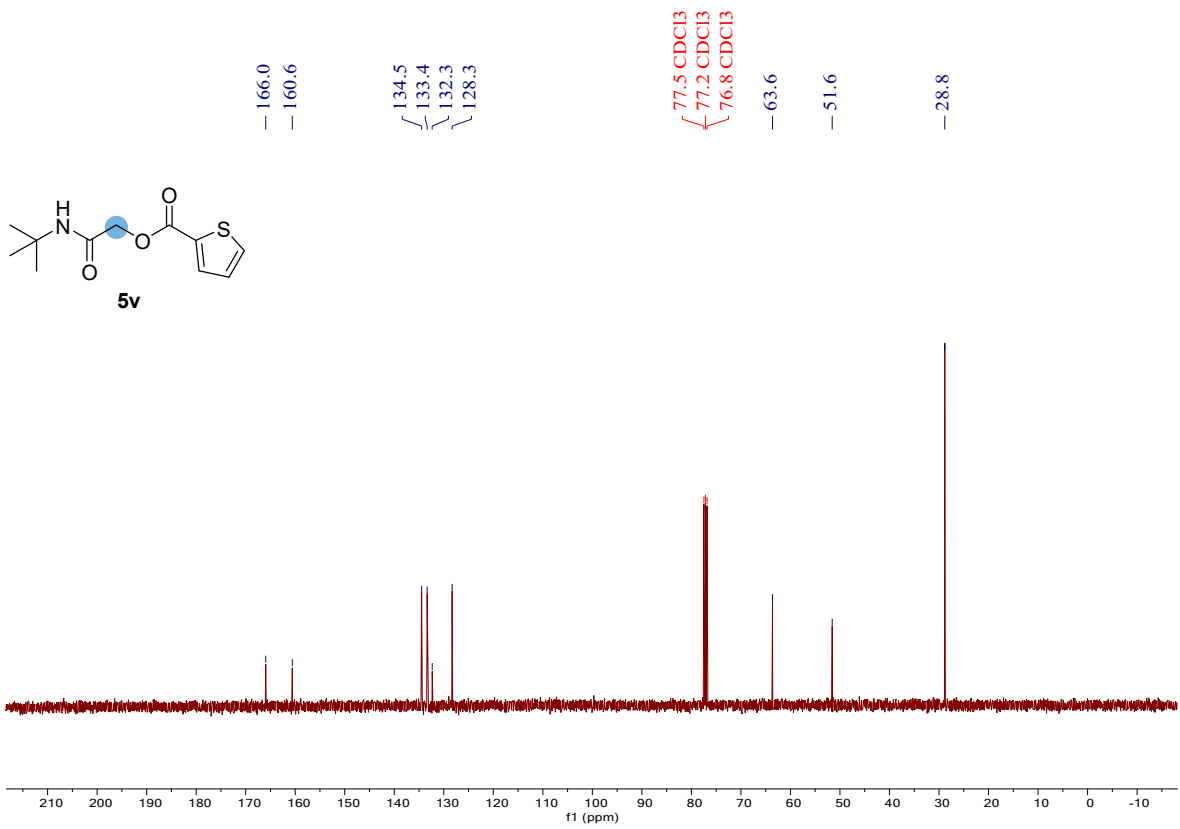

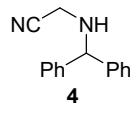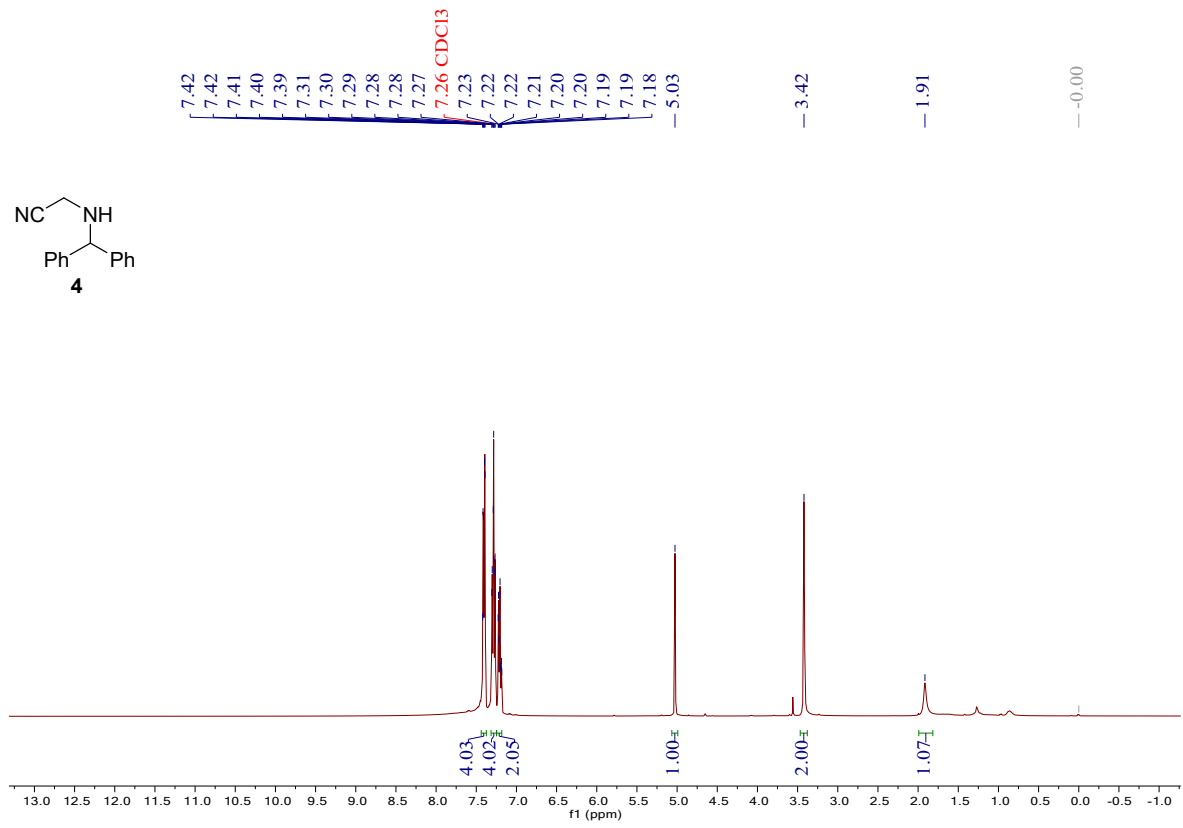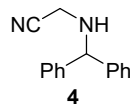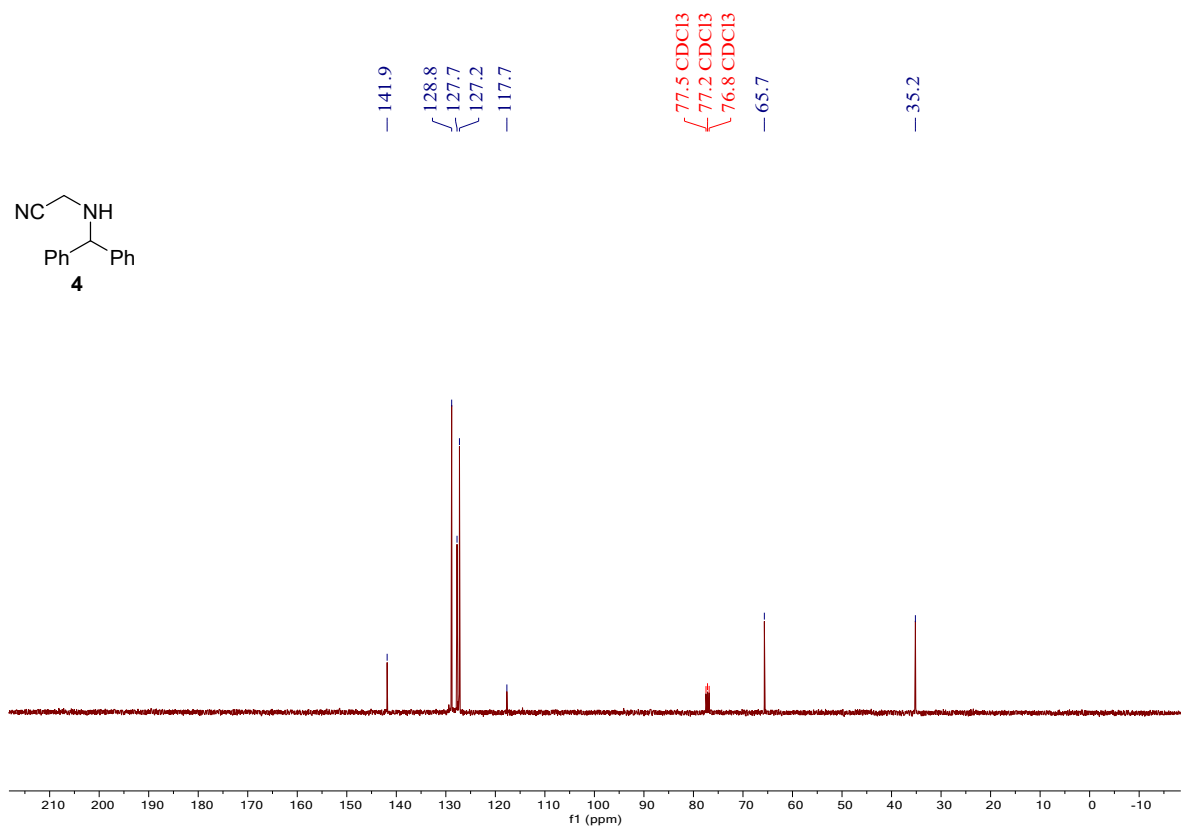



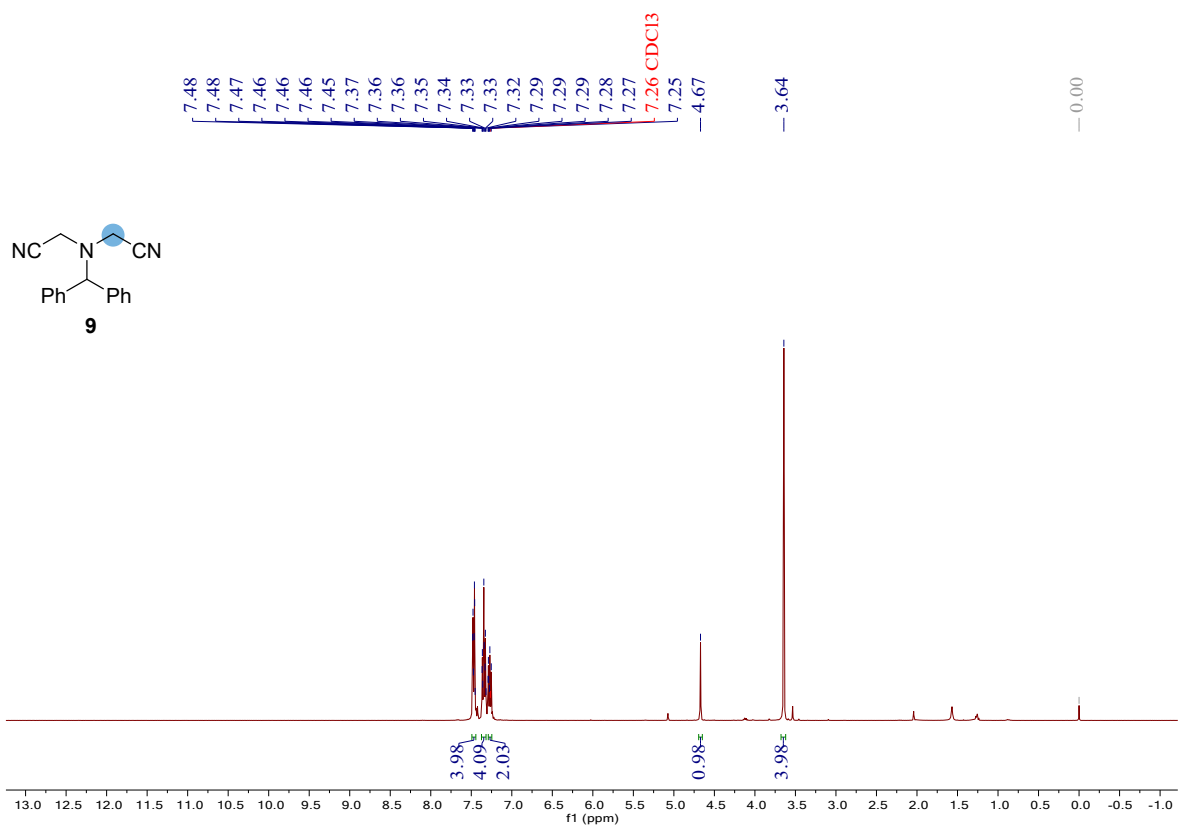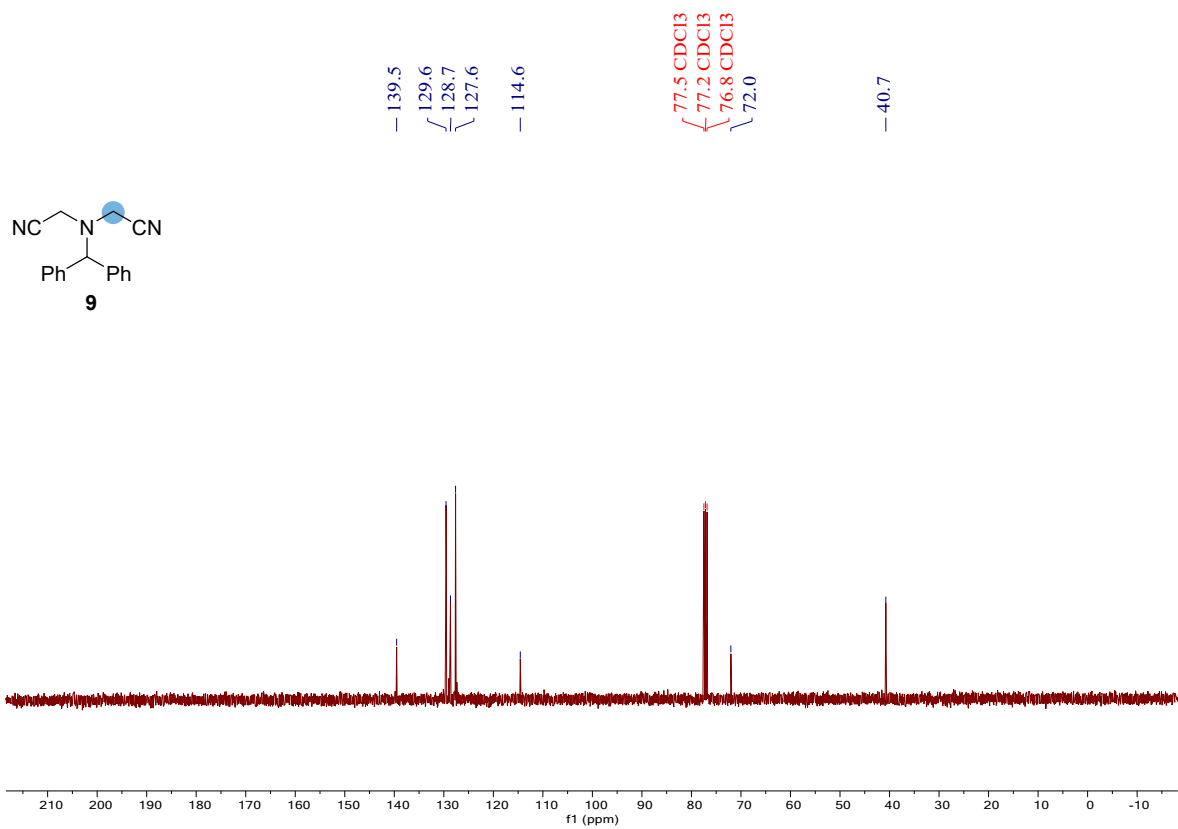

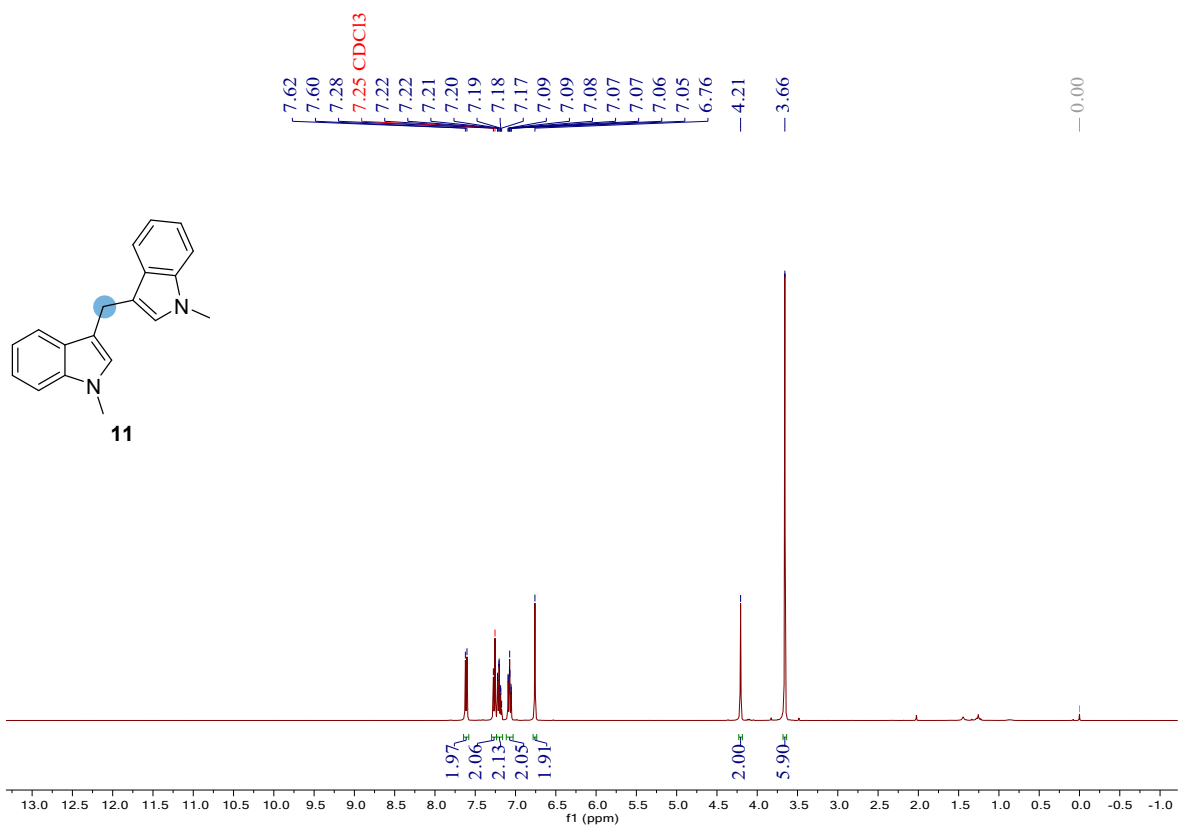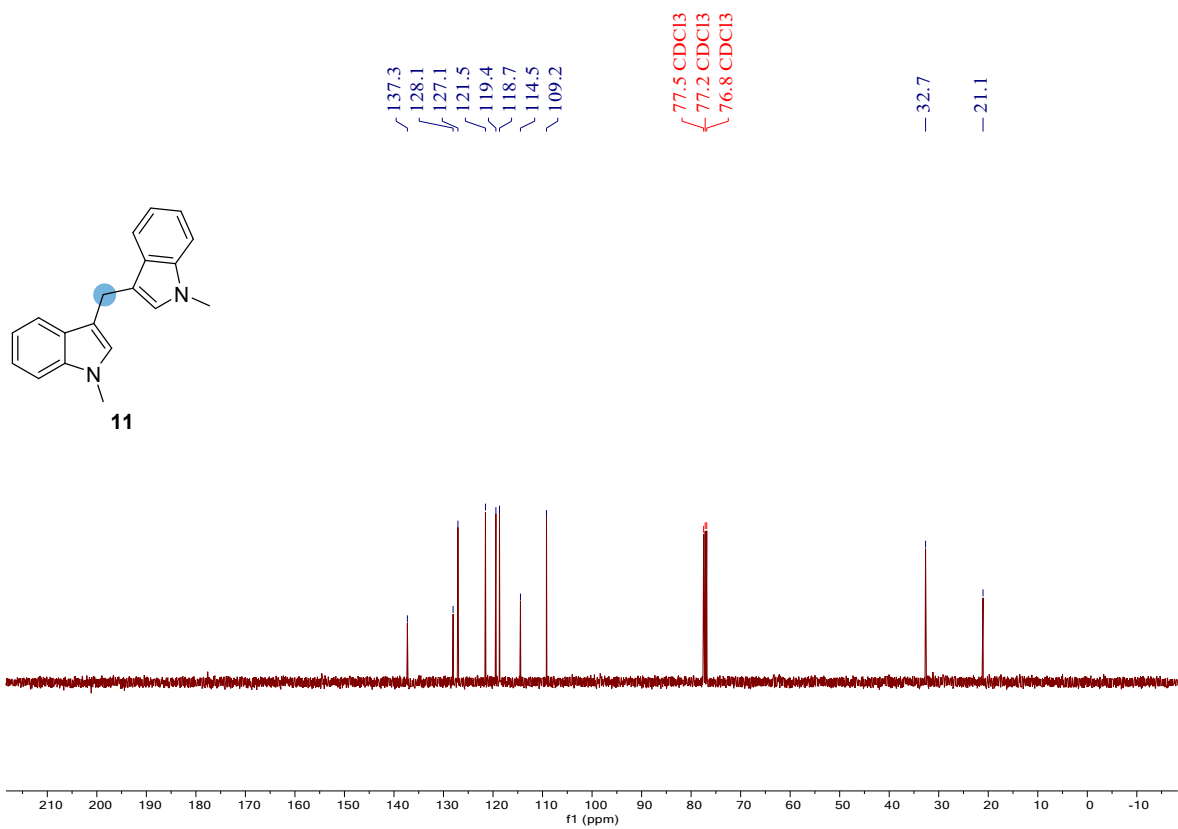

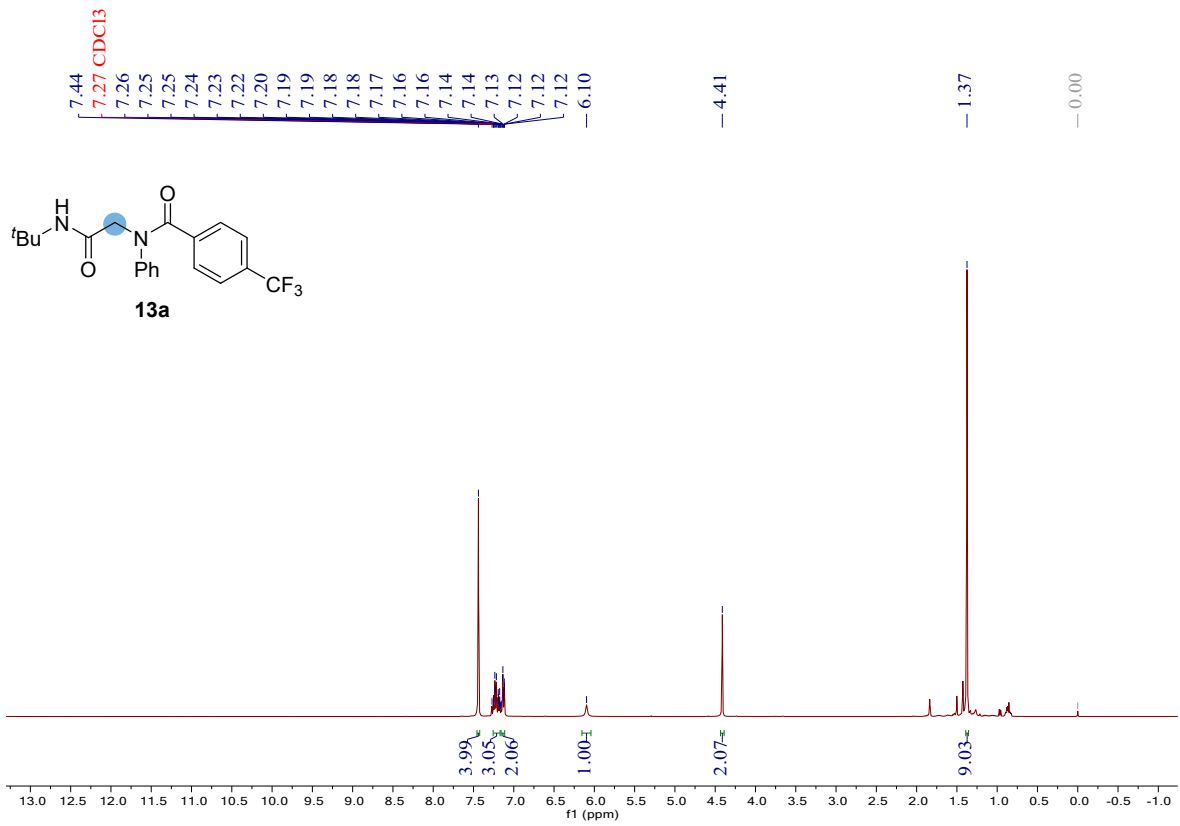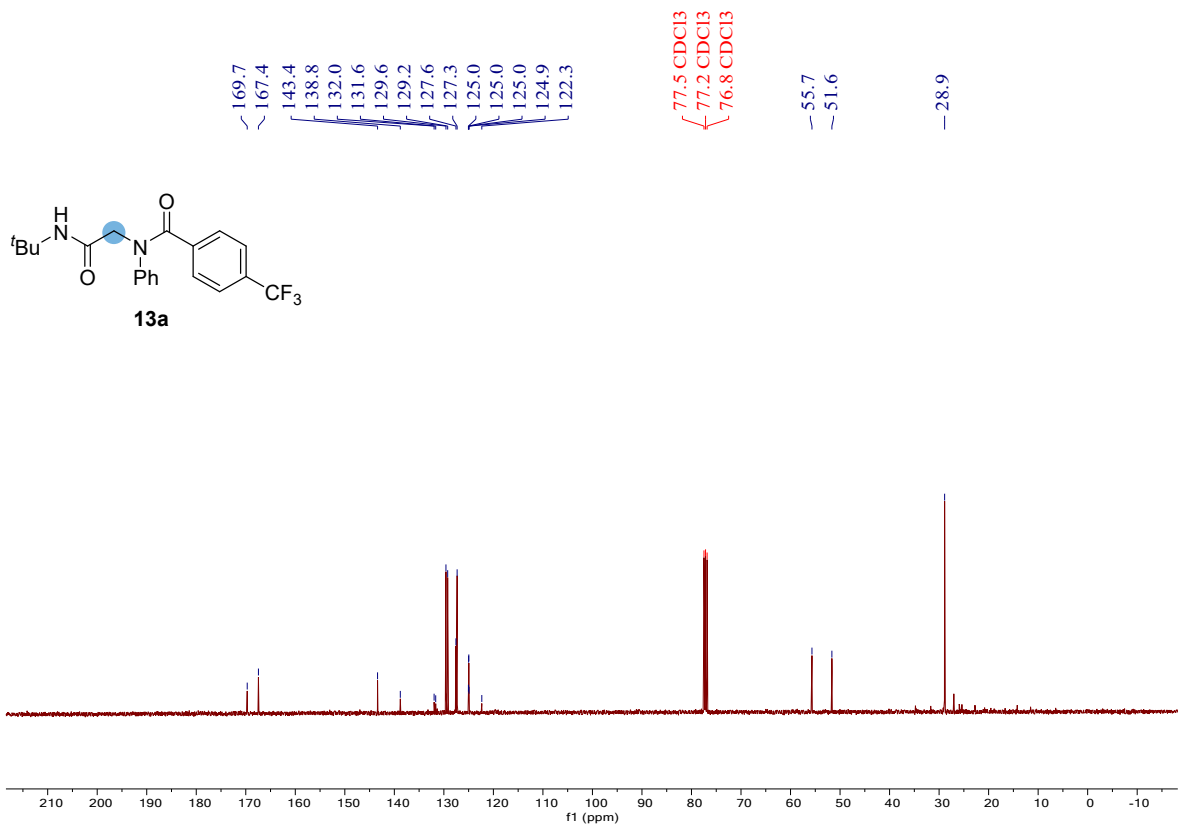

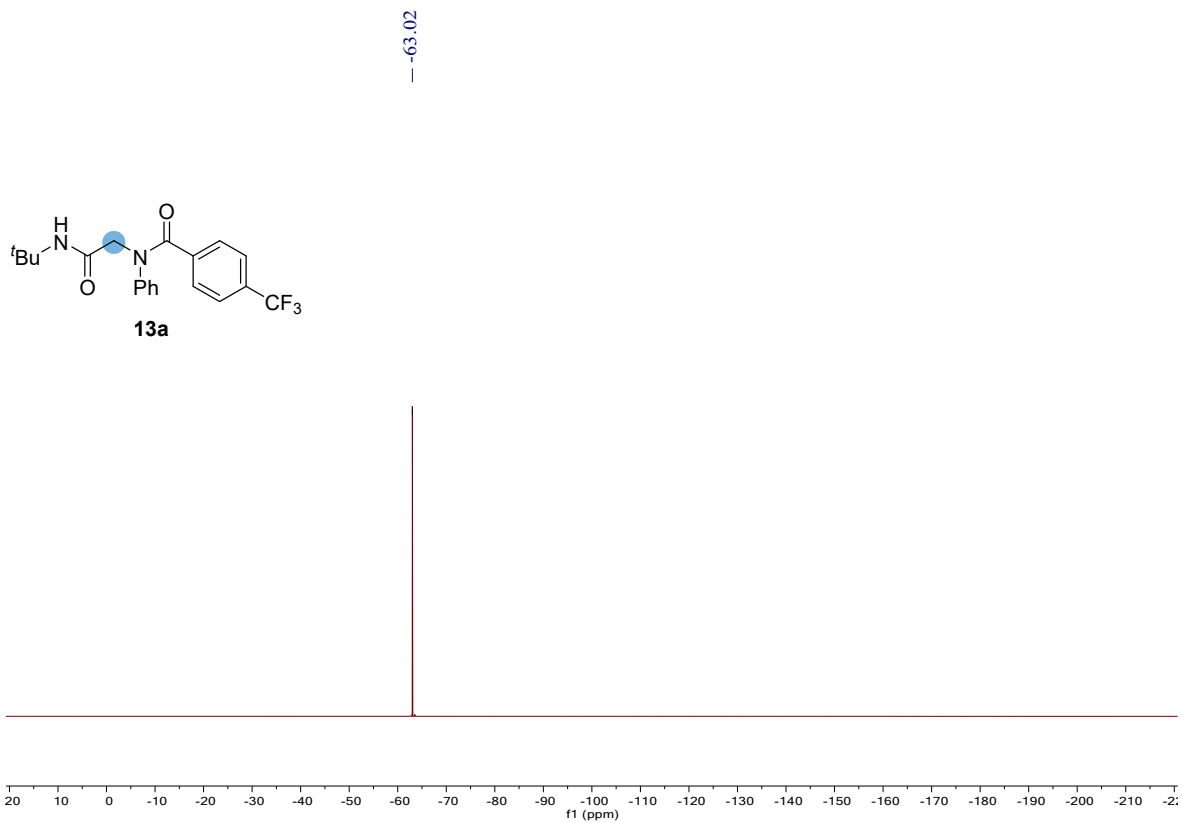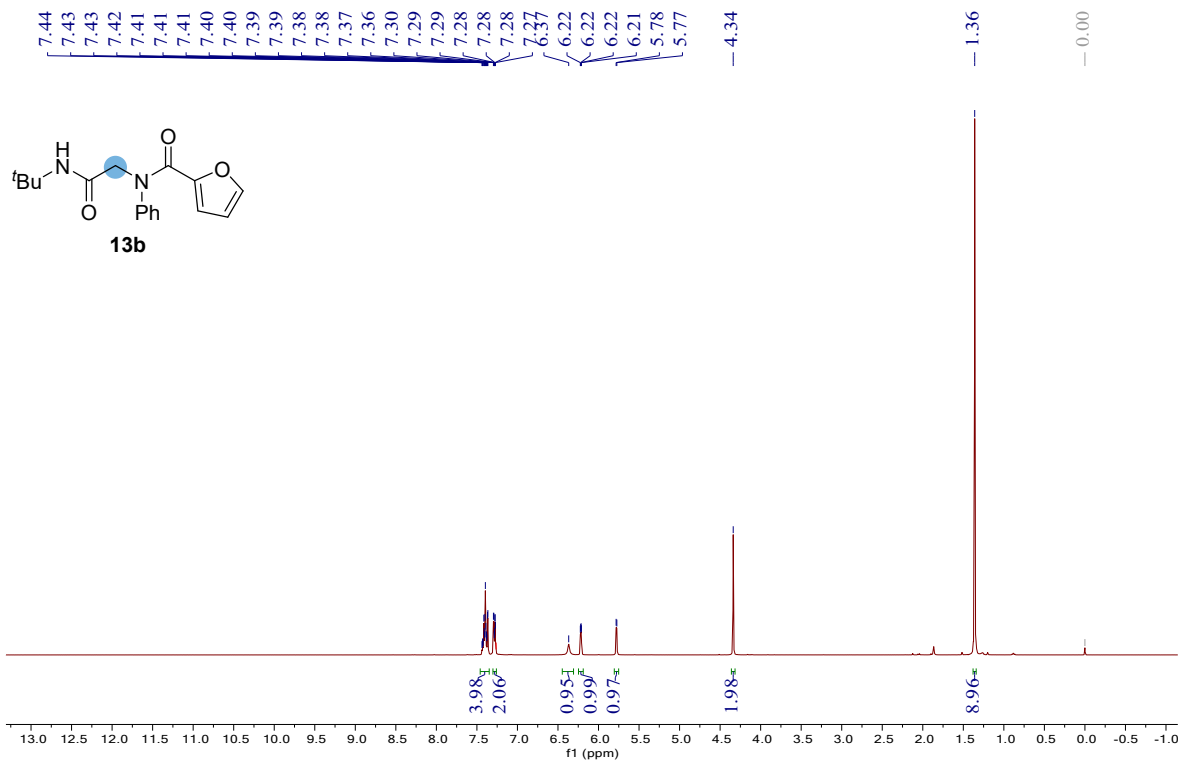

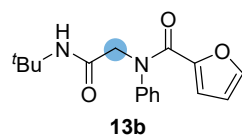

-167.7  
 -159.9  
 146.3  
 145.0  
 142.9  
 129.9  
 128.6  
 128.0  
 -117.6  
 -111.3

77.5 CDCl<sub>3</sub>  
 77.2 CDCl<sub>3</sub>  
 76.8 CDCl<sub>3</sub>

-56.2  
 -51.4

-28.8

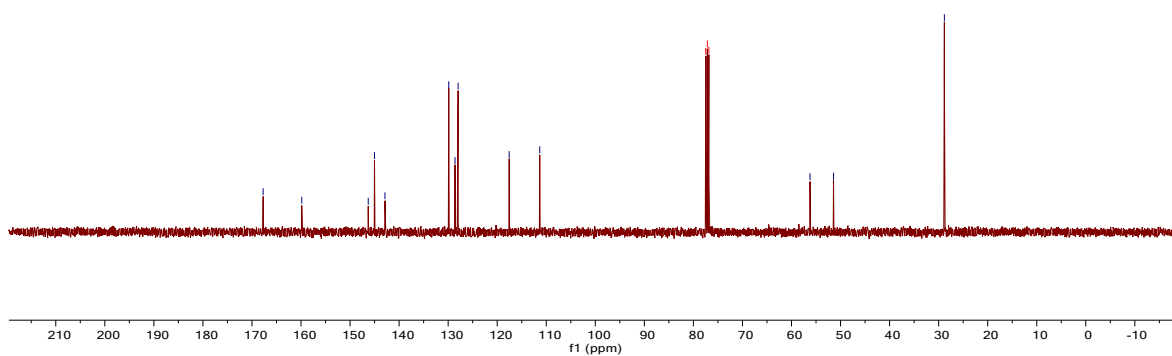

7.33  
 7.33  
 7.33  
 7.31  
 7.31  
 7.27  
 7.26 CDCl<sub>3</sub>  
 7.24  
 7.23  
 7.21  
 7.21  
 7.19  
 7.17  
 7.17  
 7.16  
 7.15  
 7.14  
 7.14  
 7.11  
 7.11  
 7.10  
 7.09  
 7.09

-4.42

-1.37

-0.00

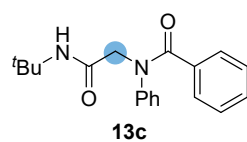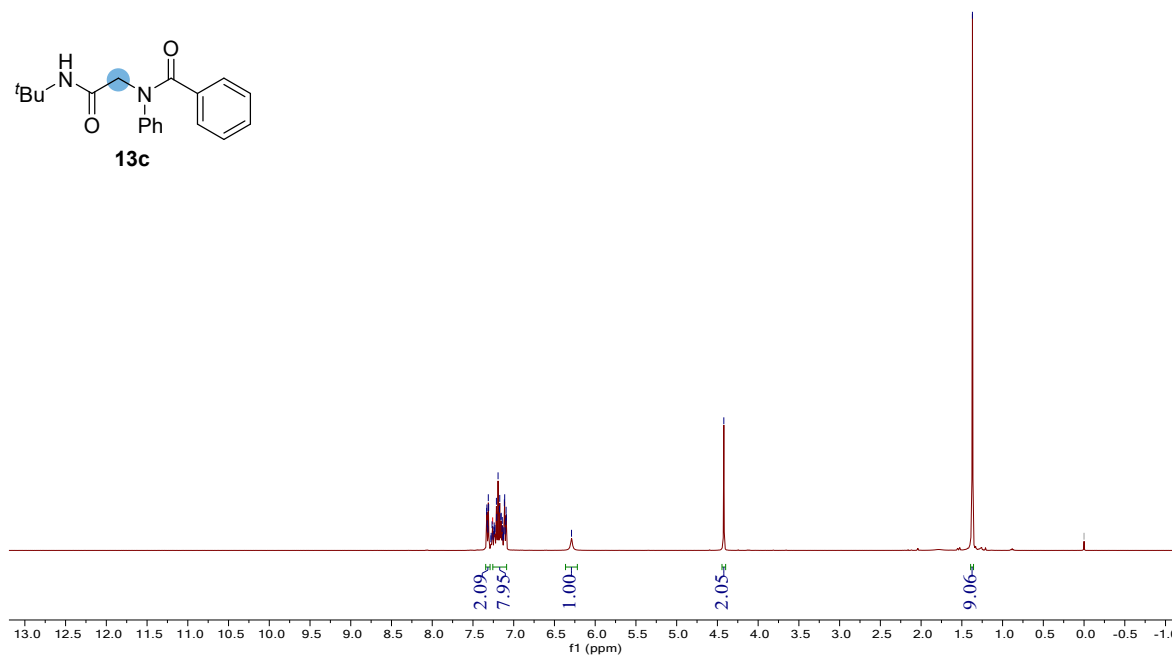

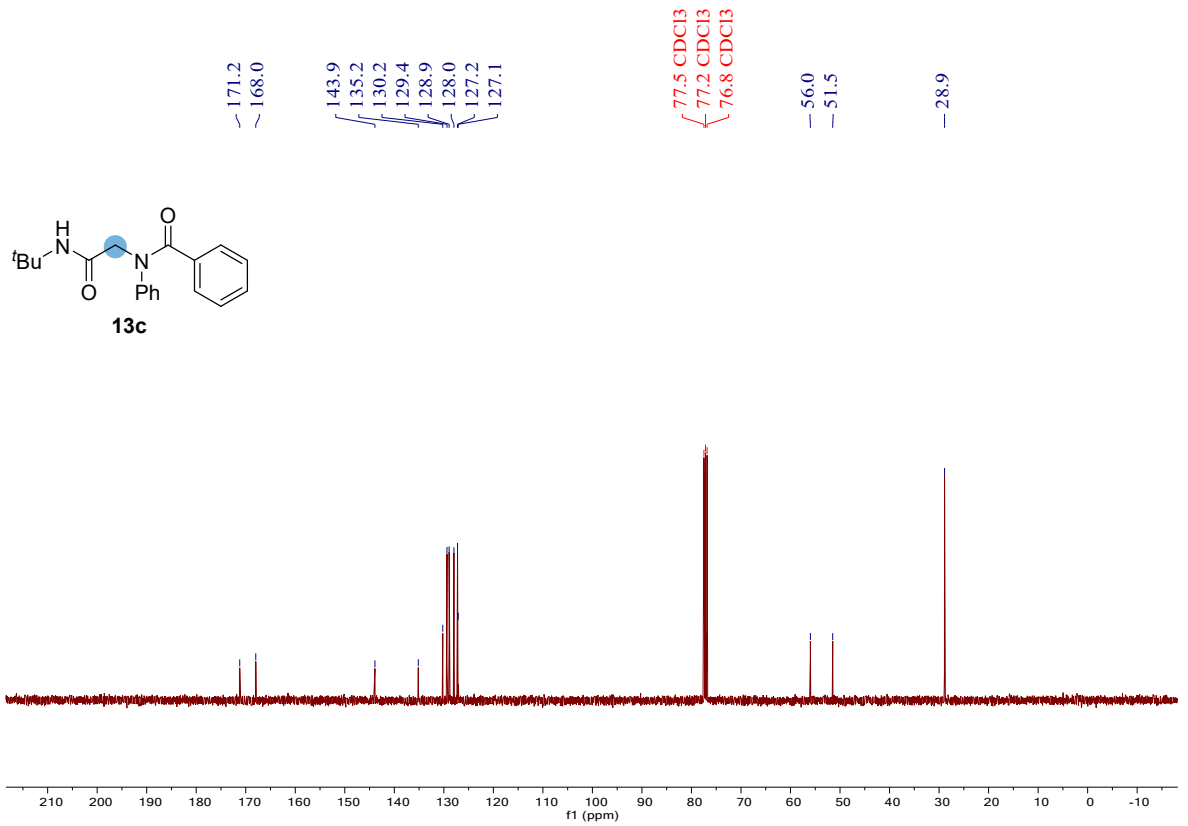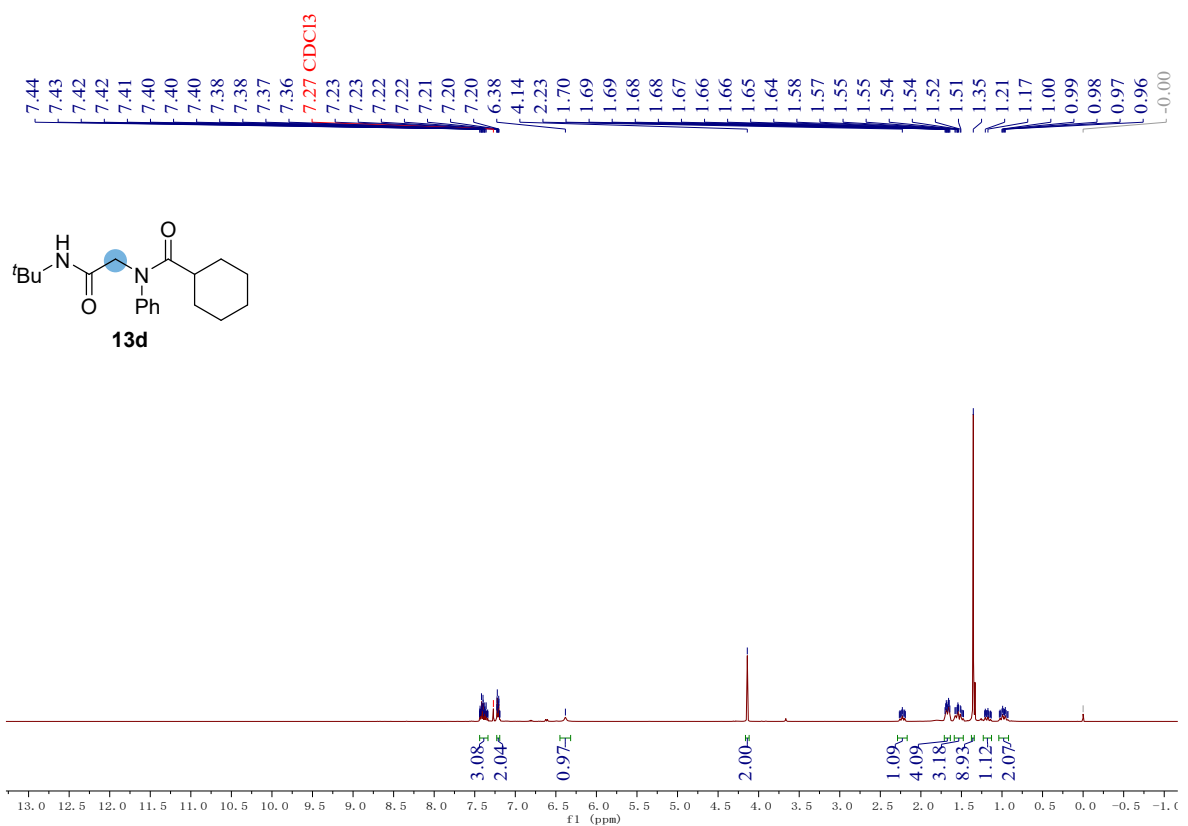

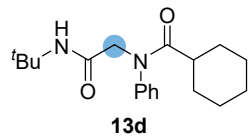

— 177.5  
— 168.6

— 143.0  
130.0  
128.4  
127.5

77.5 CDCl<sub>3</sub>  
77.2 CDCl<sub>3</sub>  
76.8 CDCl<sub>3</sub>

— 55.4  
— 51.2  
— 41.4  
29.4  
28.8  
25.6  
25.5

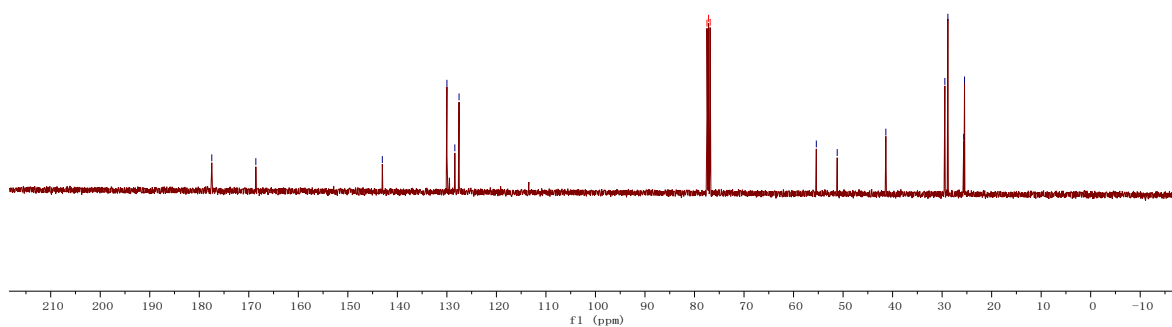

7.34  
7.33  
7.33  
7.32  
7.31  
7.27  
7.26 CDCl<sub>3</sub>  
7.24  
7.23  
7.21  
7.21  
7.20  
7.19  
7.19  
7.19  
7.17  
7.17  
7.17  
7.16  
7.16  
7.15  
7.14  
7.12  
7.12  
7.12  
7.10  
7.10  
7.10  
4.51  
3.31  
3.30  
3.30  
3.28  
3.28  
3.26  
1.52  
1.52  
1.50  
1.50  
1.48  
1.48  
1.37  
1.35  
1.35  
1.33  
1.33  
1.31  
0.93  
0.91  
0.89

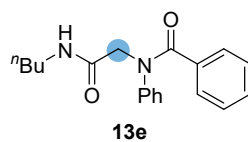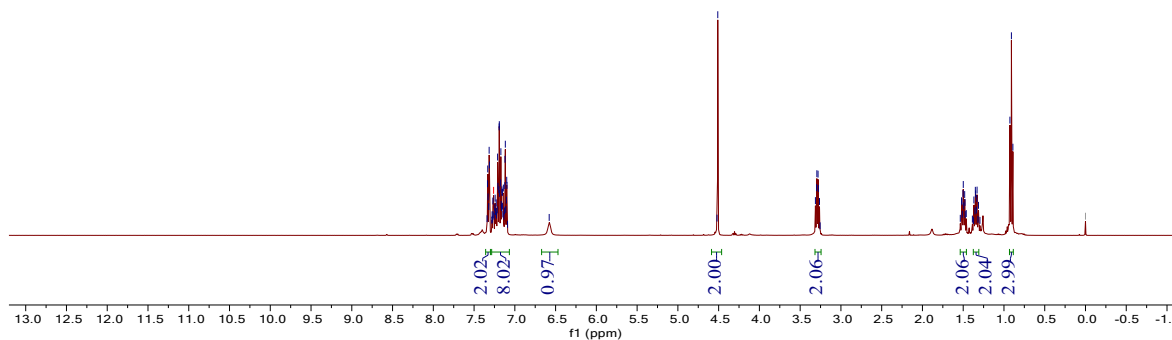

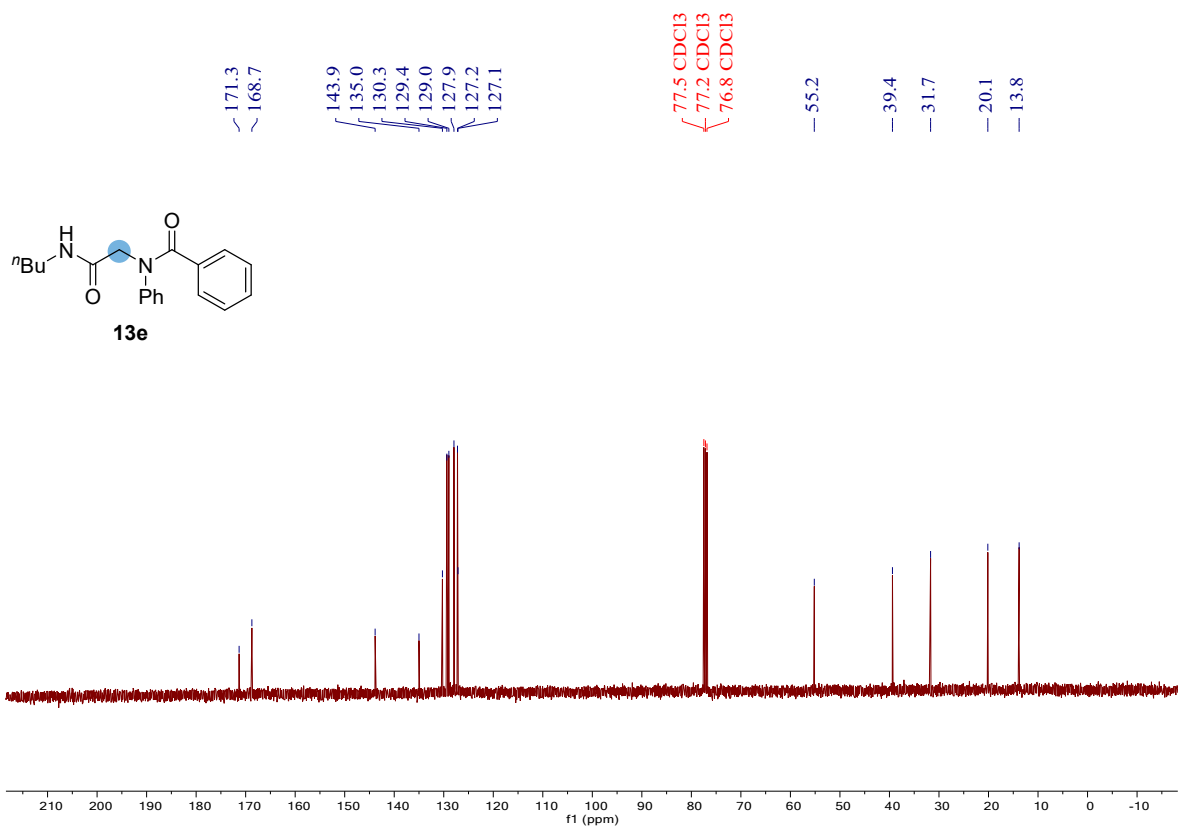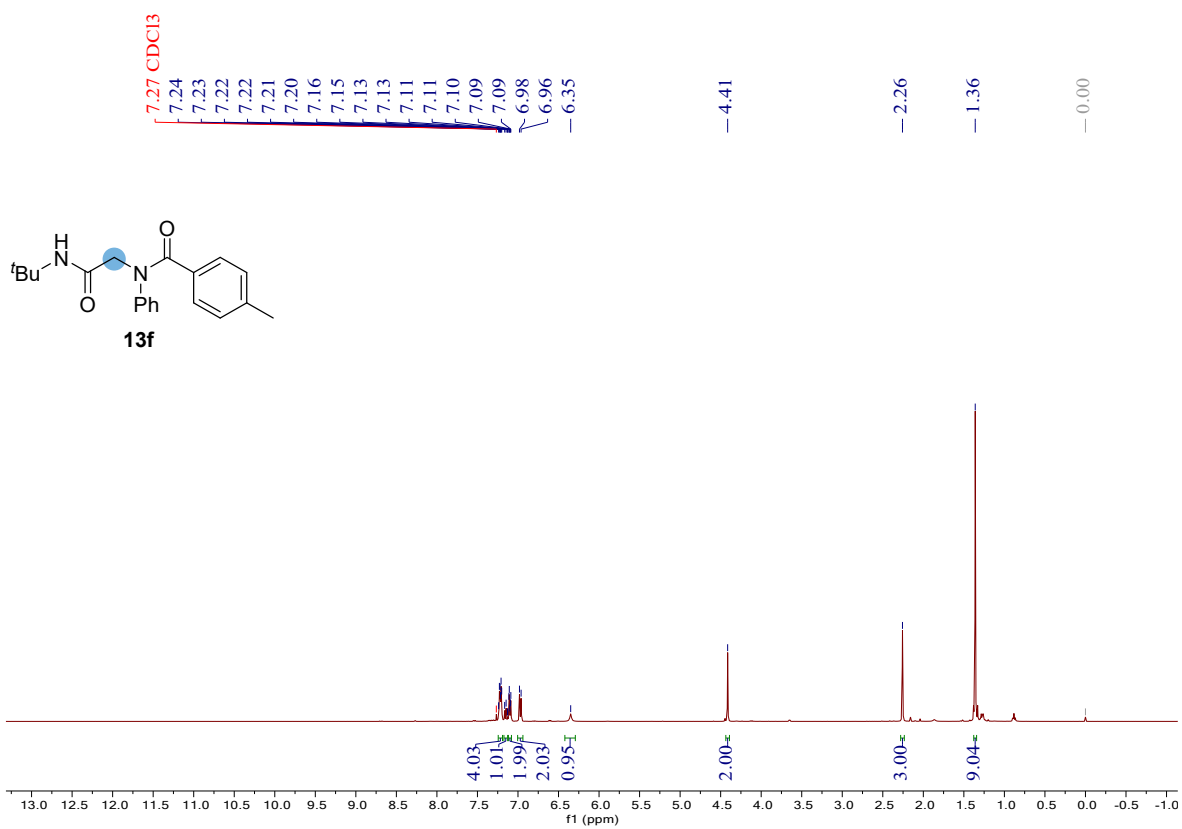



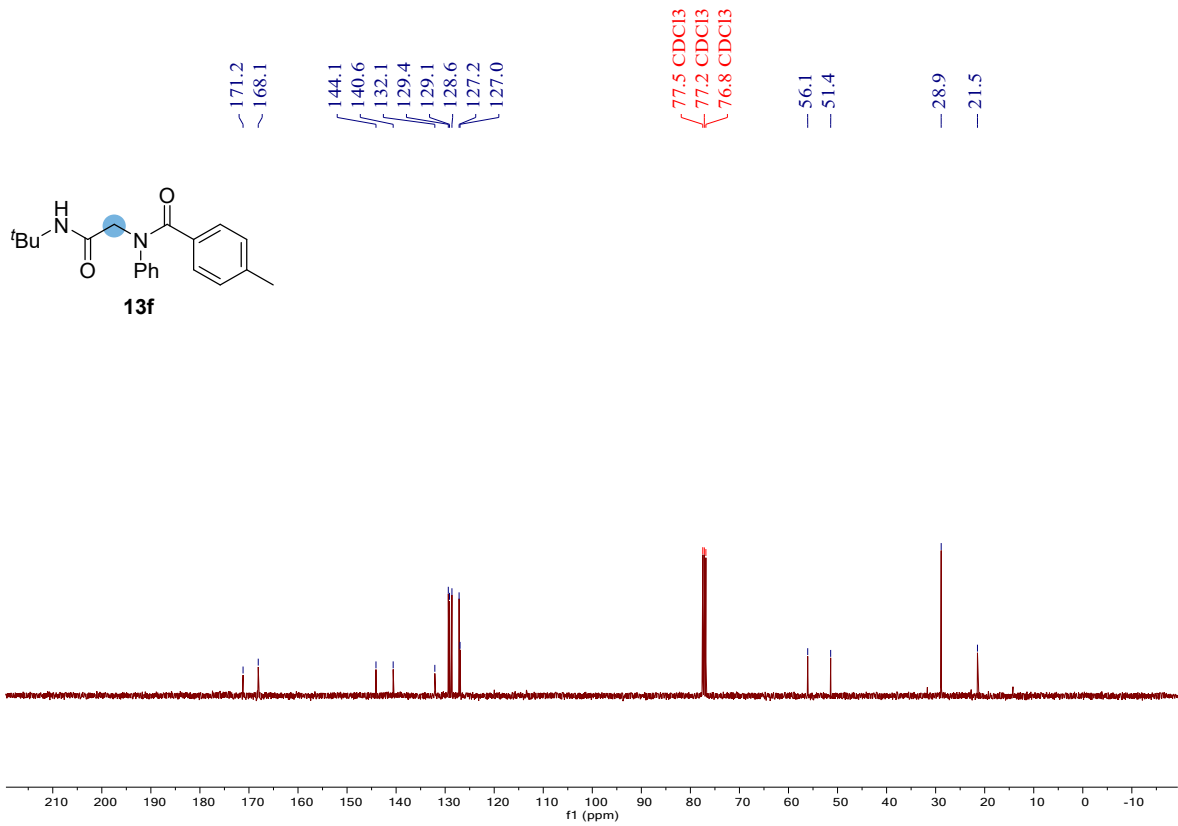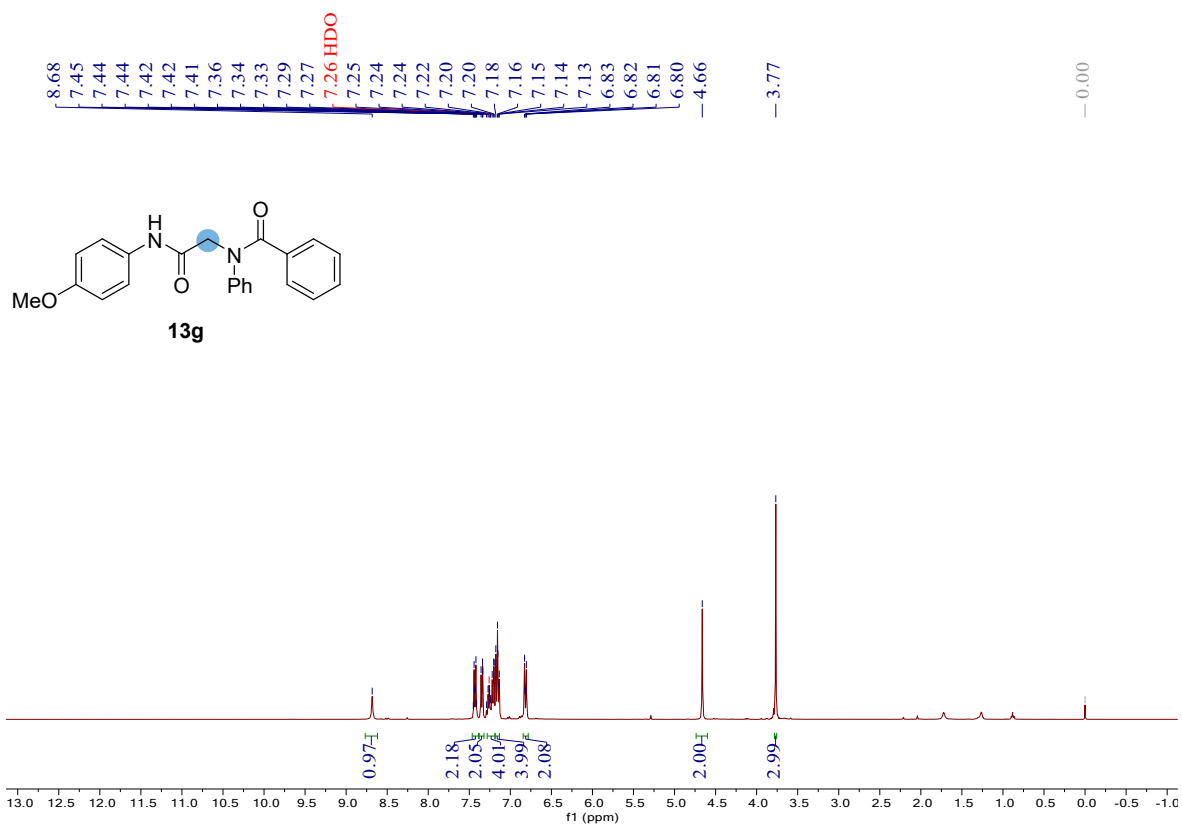

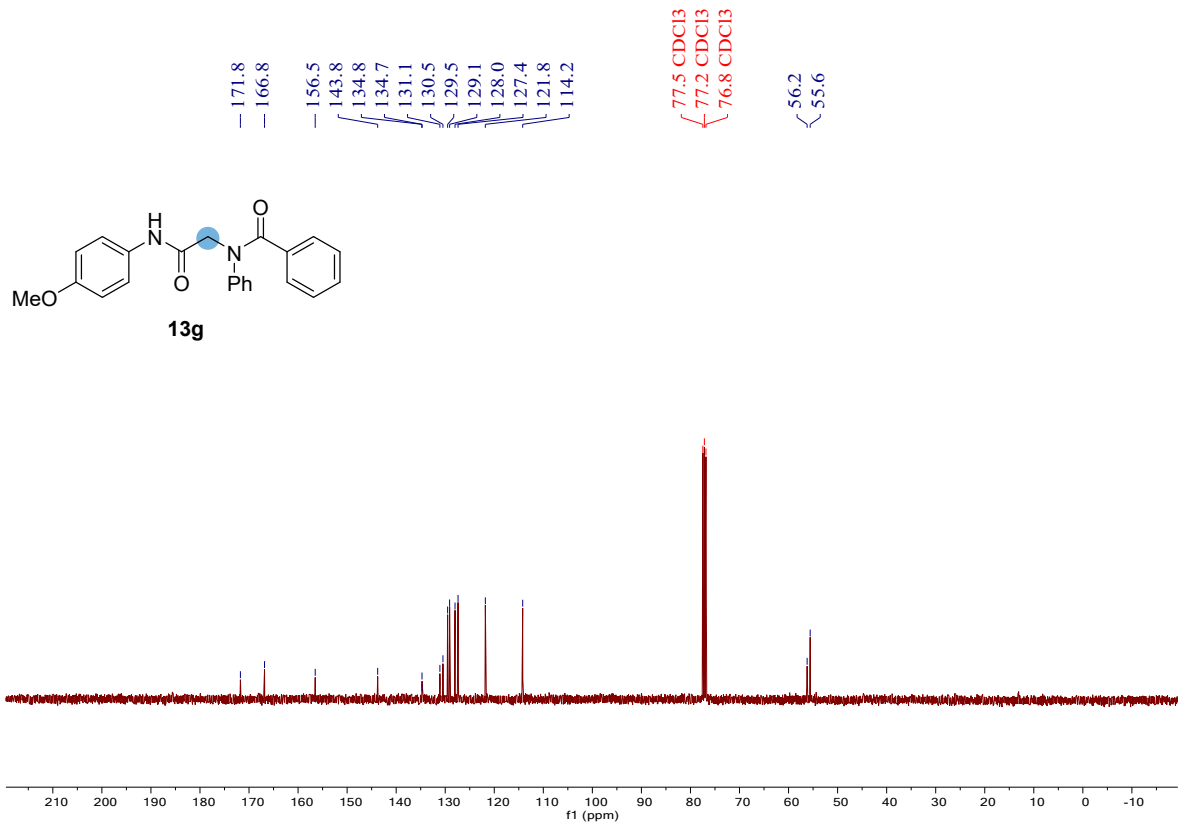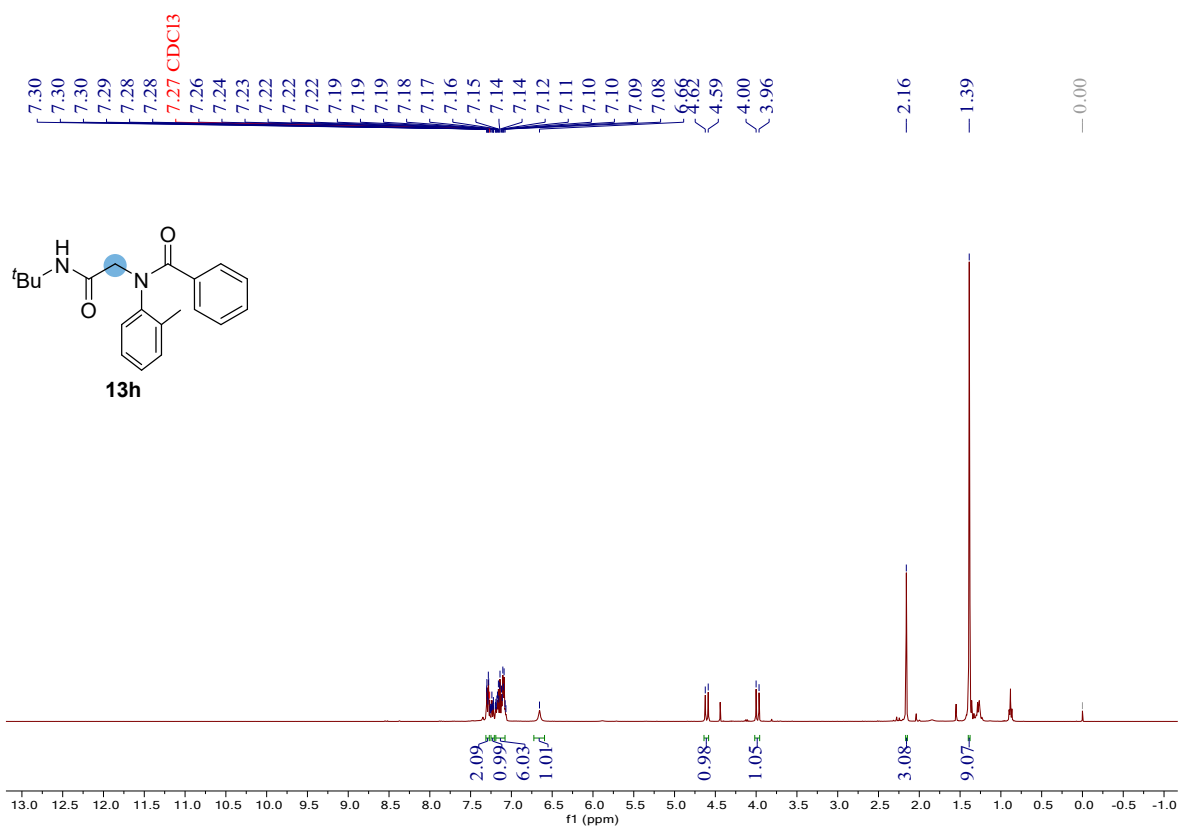

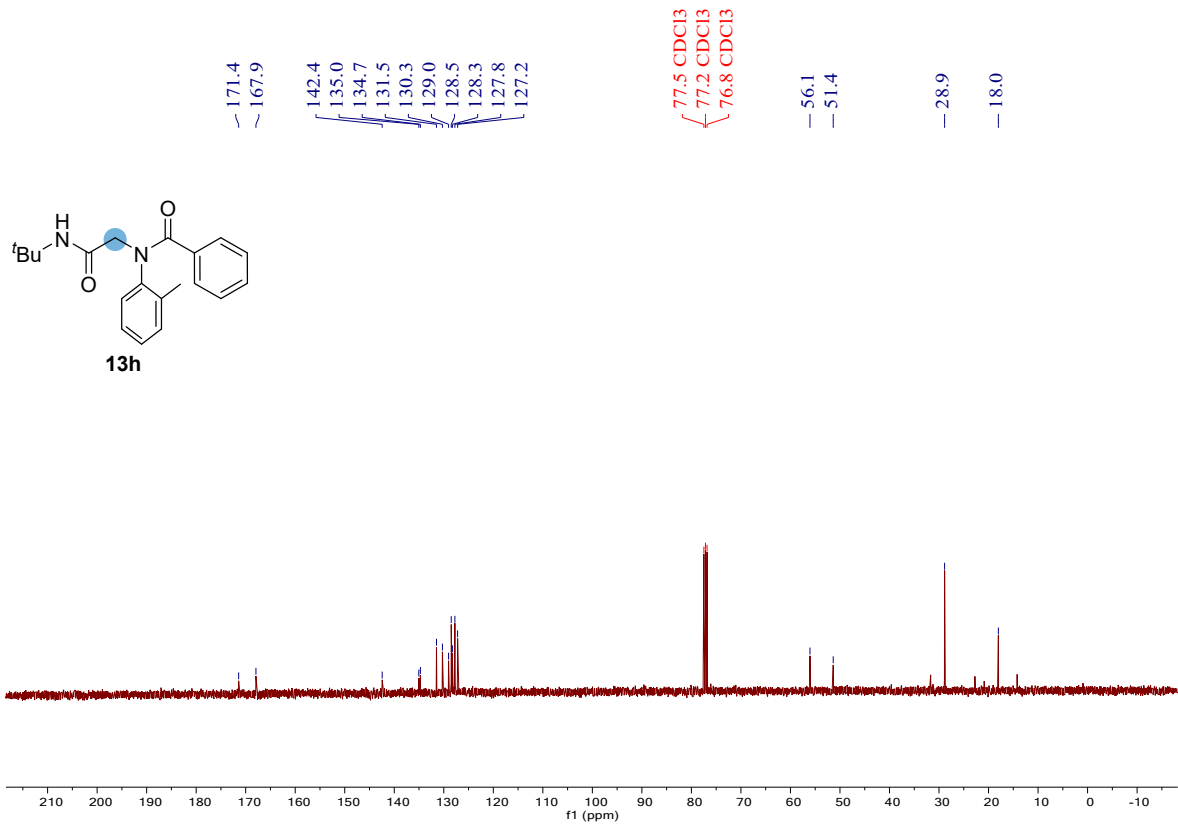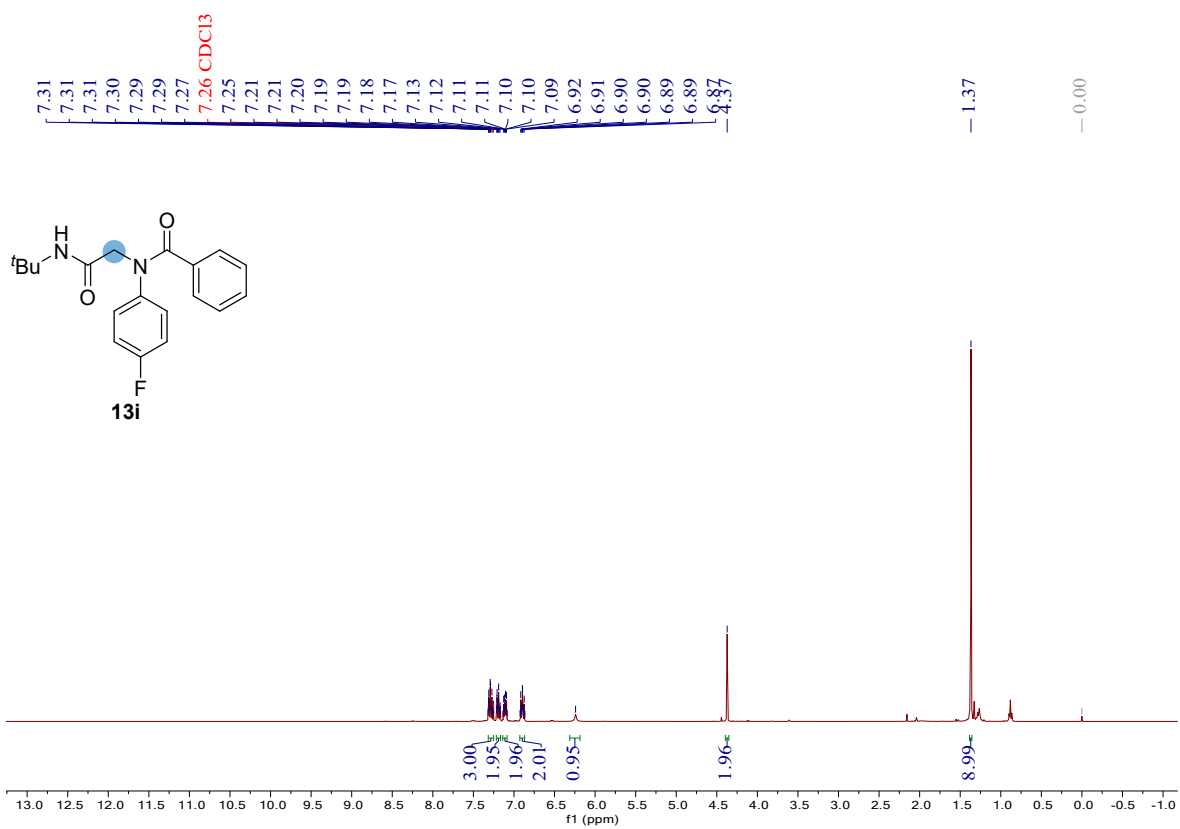

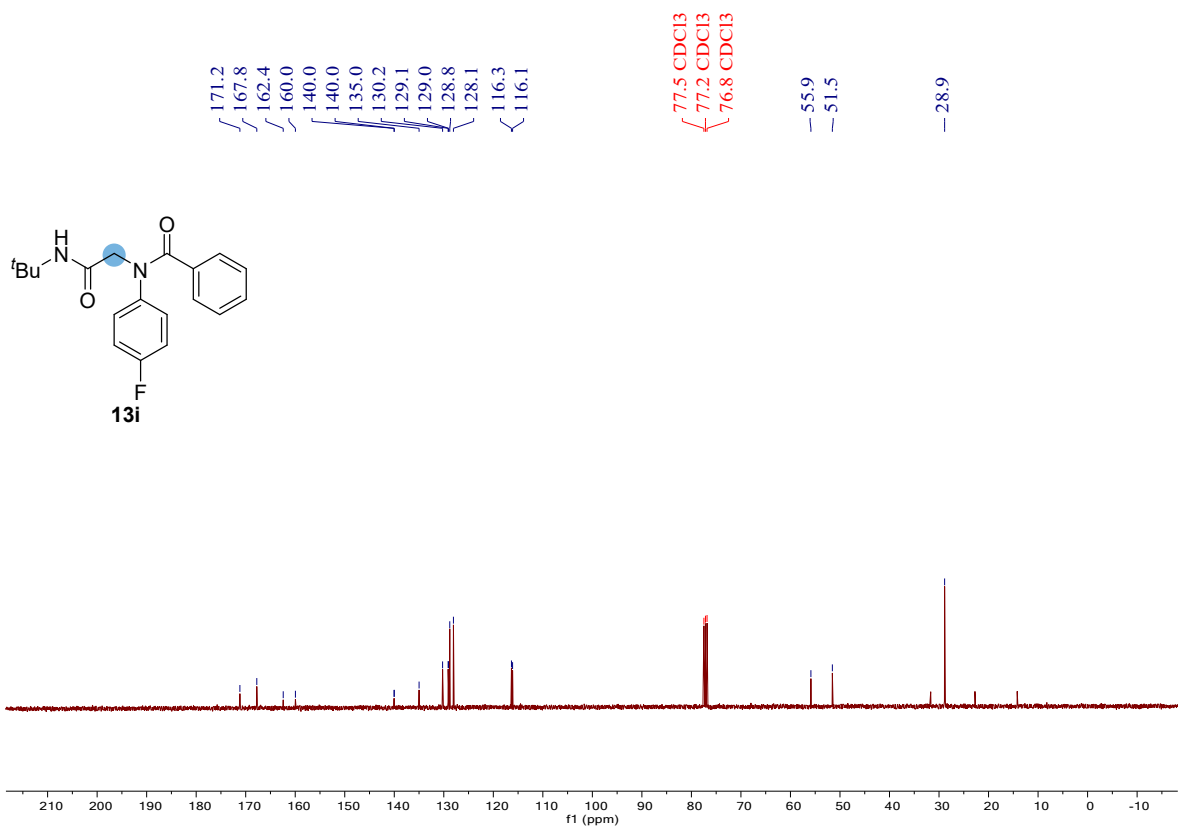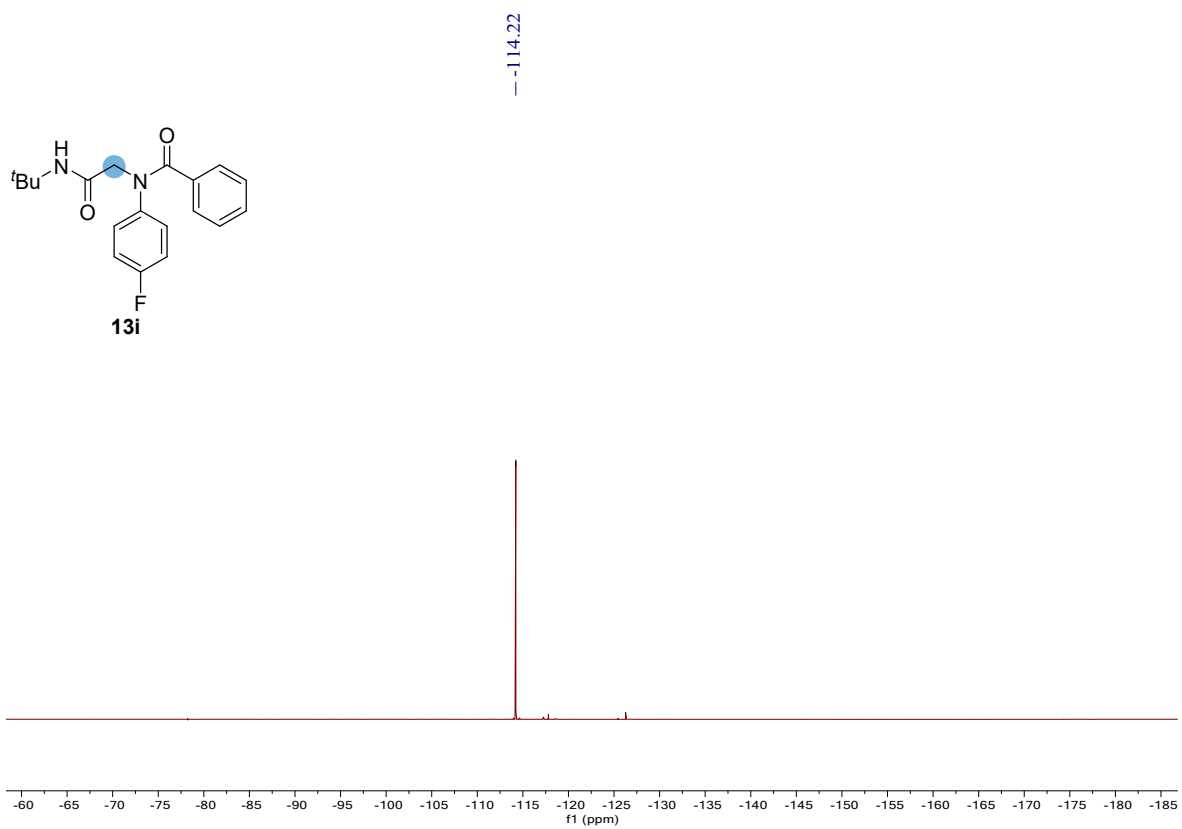

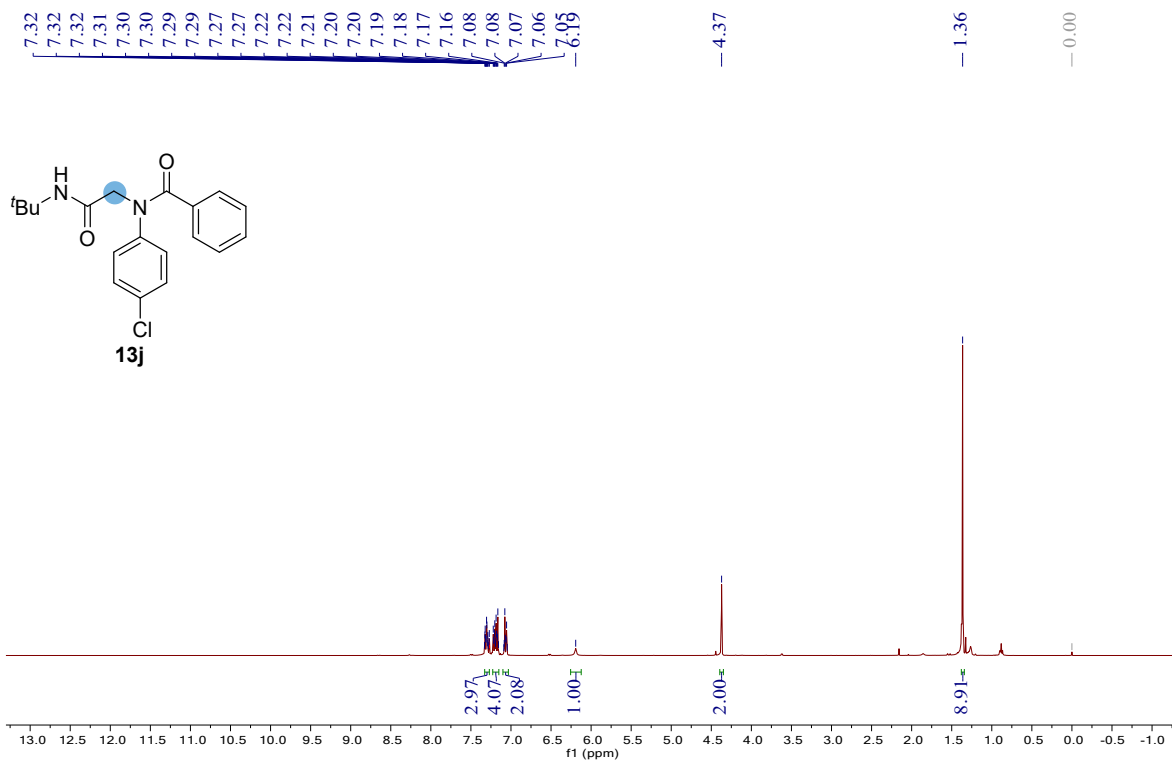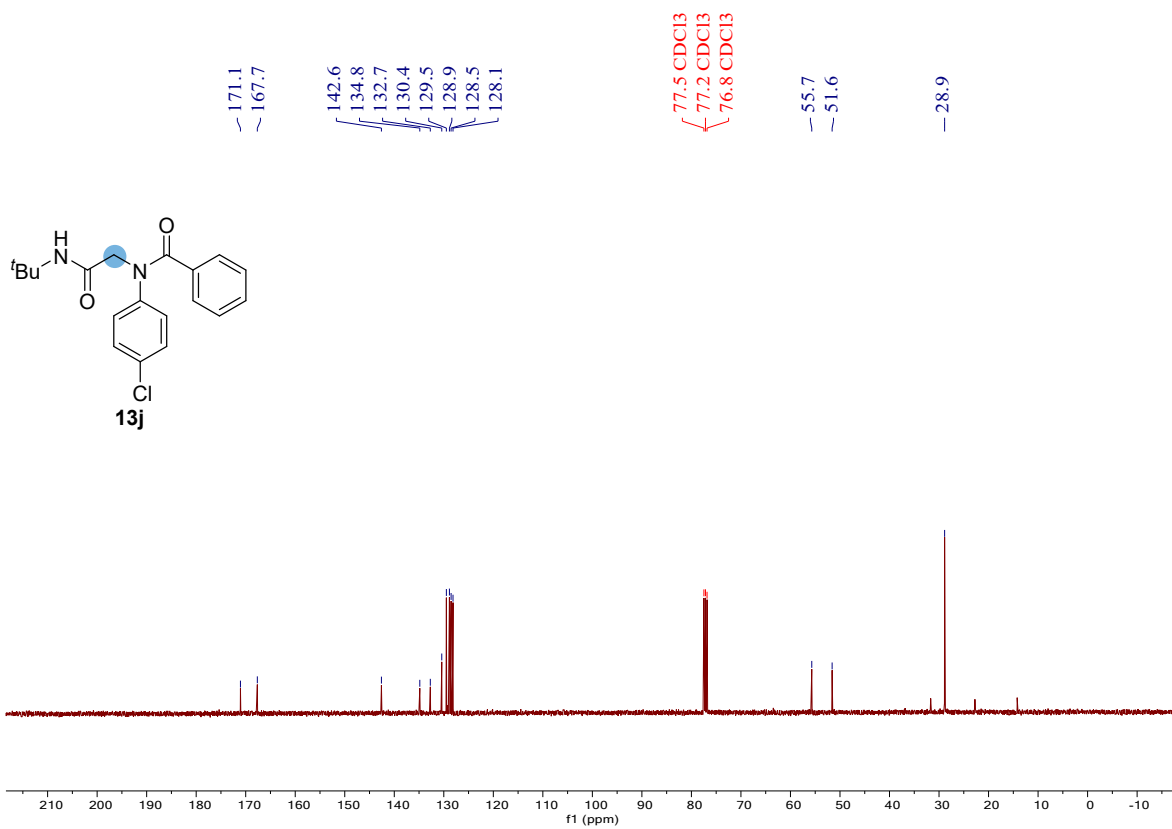

## 7. Crystal data and structure refinement for 5a and 13g

Compound **5a**: (The crystal structure of compound **5a** has been deposited at the Cambridge Crystallographic Data Centre (CCDC 2062894). The data is available free of charge at [www.ccdc.cam.ac.uk/conts/retrieving.html](http://www.ccdc.cam.ac.uk/conts/retrieving.html).)

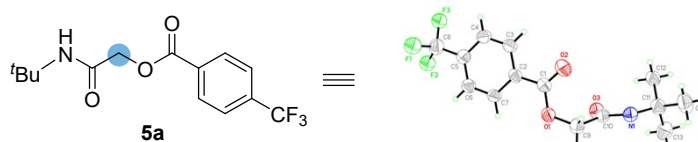

Crystal data and structure refinement for **5a**.

|                                        |                                                                |                 |
|----------------------------------------|----------------------------------------------------------------|-----------------|
| Empirical formula                      | C <sub>14</sub> H <sub>16</sub> F <sub>3</sub> NO <sub>3</sub> |                 |
| Formula weight                         | 303.28                                                         |                 |
| Temperature/K                          | 293                                                            |                 |
| Wavelength                             | 1.54184 Å                                                      |                 |
| Crystal system                         | monoclinic                                                     |                 |
| Space group                            | P 21/c                                                         |                 |
| Unit cell dimensions                   | a = 14.5103(9) Å                                               | α = 90 °        |
|                                        | b = 10.8097(7) Å                                               | β = 93.534(6) ° |
|                                        | c = 9.4091(5) Å                                                | γ = 90 °        |
| Volume/Å <sup>3</sup>                  | 1473.03(16)                                                    |                 |
| Z                                      | 4                                                              |                 |
| Density (calculated) g/cm <sup>3</sup> | 1.363                                                          |                 |
| F(000)                                 | 628                                                            |                 |
| Crystal size/mm <sup>3</sup>           | 0.60 × 0.30 × 0.28                                             |                 |
| Theta range for data collection/°      | 3.051 to 67.076                                                |                 |
| Index ranges                           | -17 ≤ h ≤ 17, -12 ≤ k ≤ 12, -11 ≤ l ≤ 7                        |                 |

Compound **13g**: (The crystal structure of compound **13g** has been deposited at the Cambridge Crystallographic Data Centre (CCDC 2082920). The data is available free of charge at [www.ccdc.cam.ac.uk/conts/retrieving.html](http://www.ccdc.cam.ac.uk/conts/retrieving.html).)

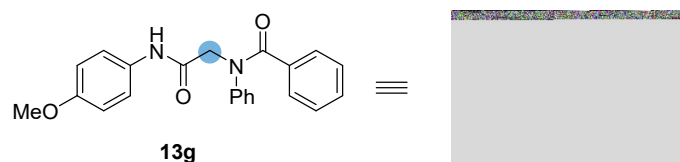

Crystal data and structure refinement for **13g**.

|                                        |                                                               |                  |
|----------------------------------------|---------------------------------------------------------------|------------------|
| Empirical formula                      | C <sub>22</sub> H <sub>20</sub> N <sub>2</sub> O <sub>3</sub> |                  |
| Formula weight                         | 360.41                                                        |                  |
| Temperature/K                          | 223                                                           |                  |
| Wavelength                             | 1.54178 Å                                                     |                  |
| Crystal system                         | monoclinic                                                    |                  |
| Space group                            | C 2                                                           |                  |
| Unit cell dimensions                   | a = 25.6297(8) Å                                              | α = 90 °         |
|                                        | b = 6.39261(18) Å                                             | β = 114.818(3) ° |
|                                        | c = 12.4690(3) Å                                              | γ = 90 °         |
| Volume/Å <sup>3</sup>                  | 1854.25(10)                                                   |                  |
| Z                                      | 4                                                             |                  |
| Density (calculated) g/cm <sup>3</sup> | 1.291                                                         |                  |
| F(000)                                 | 760                                                           |                  |
| Crystal size/mm <sup>3</sup>           | 0.40 × 0.20 × 0.15                                            |                  |
| Theta range for data collection/°      | 3.800 to 77.285                                               |                  |
| Index ranges                           | -30 ≤ h ≤ 32, -7 ≤ k ≤ 8, -15 ≤ l ≤ 13                        |                  |
